# Supplementary material
Source: ML conference proceedings conference paper supplement (https://openreview.net/forum?id=TvpaeQVTGQ)

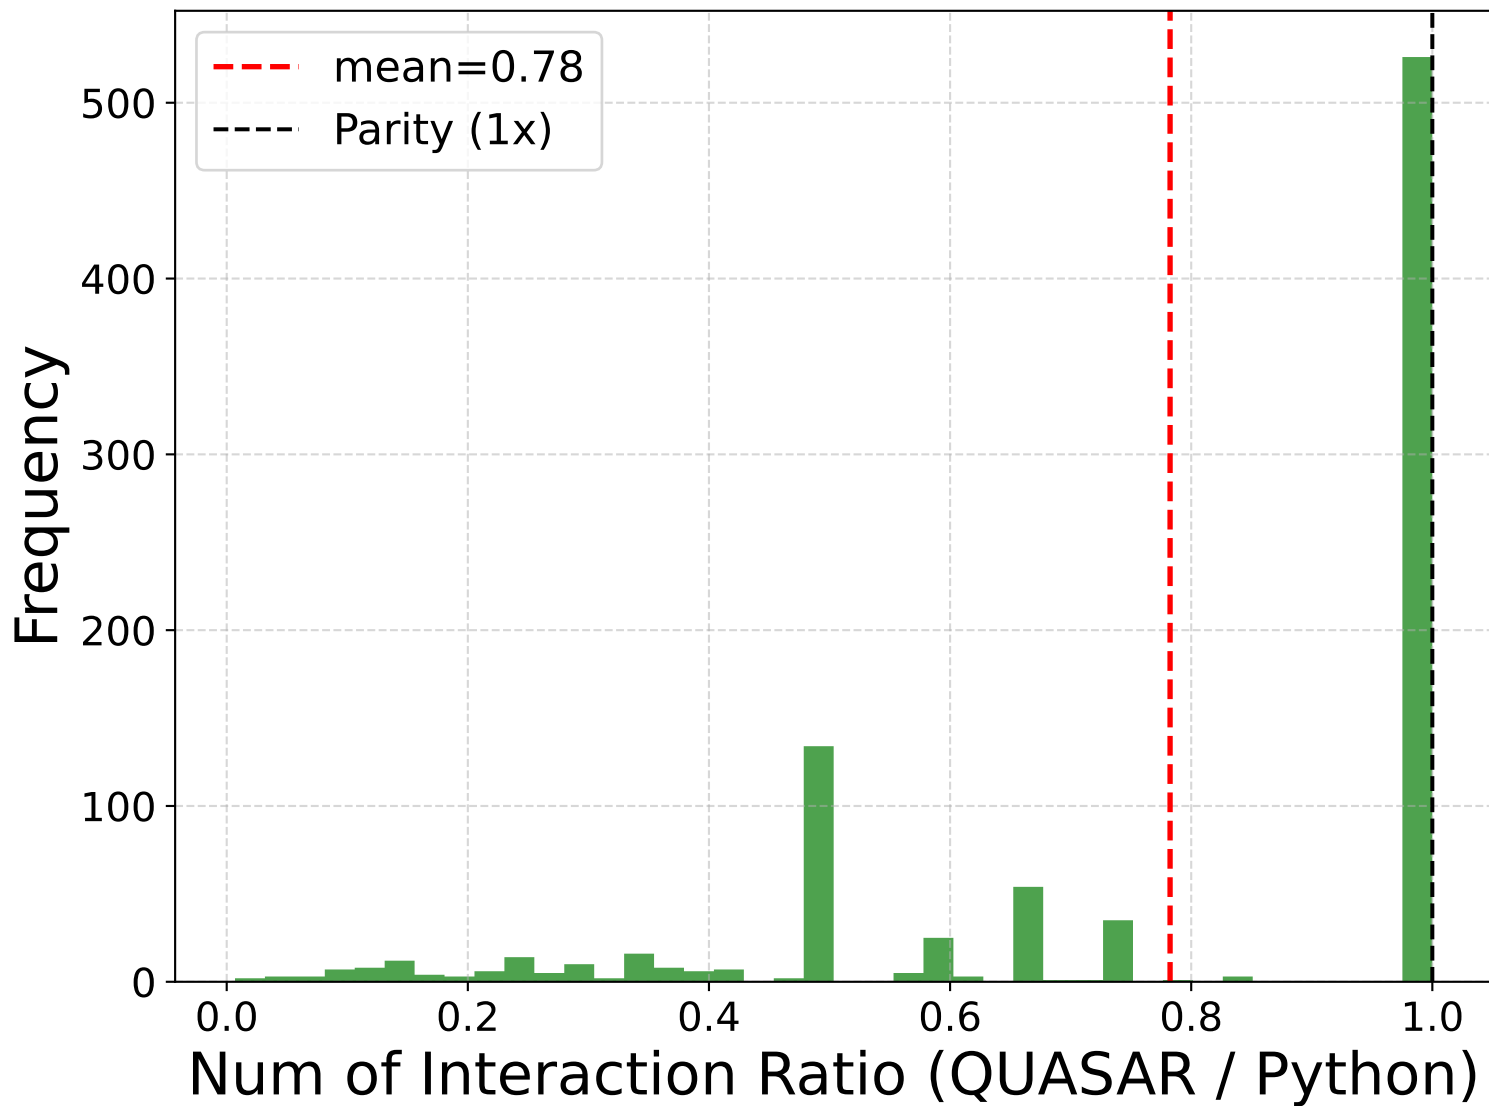

Supplement: supplementary_material [file all_interaction_histogram.pdf › quasar/datasets/gqa/plots/interactions/epic_compiled_rounds_4o_all_epic/all_interaction_histogram.pdf]

Frequency (log scale)

mean=0.78  
Parity (1x)

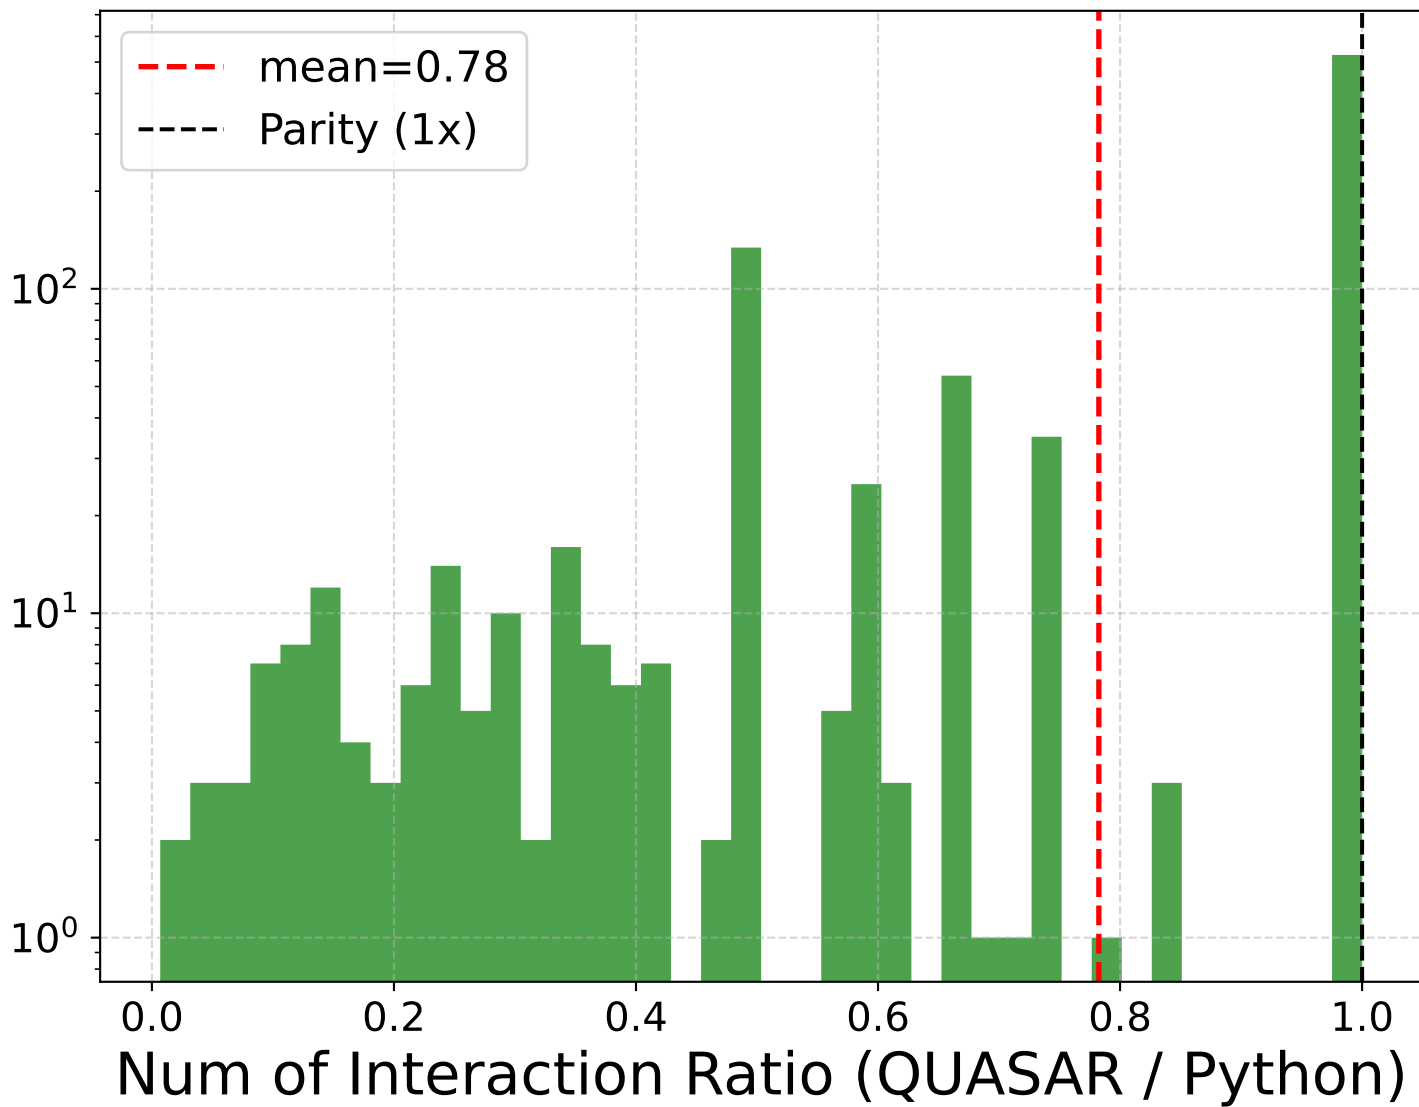

Supplement: supplementary_material [file all_interaction_histogram_log.pdf › quasar/datasets/gqa/plots/interactions/epic_compiled_rounds_4o_all_epic/all_interaction_histogram_log.pdf]

QUASAR Interaction Count

Equal Interaction Count

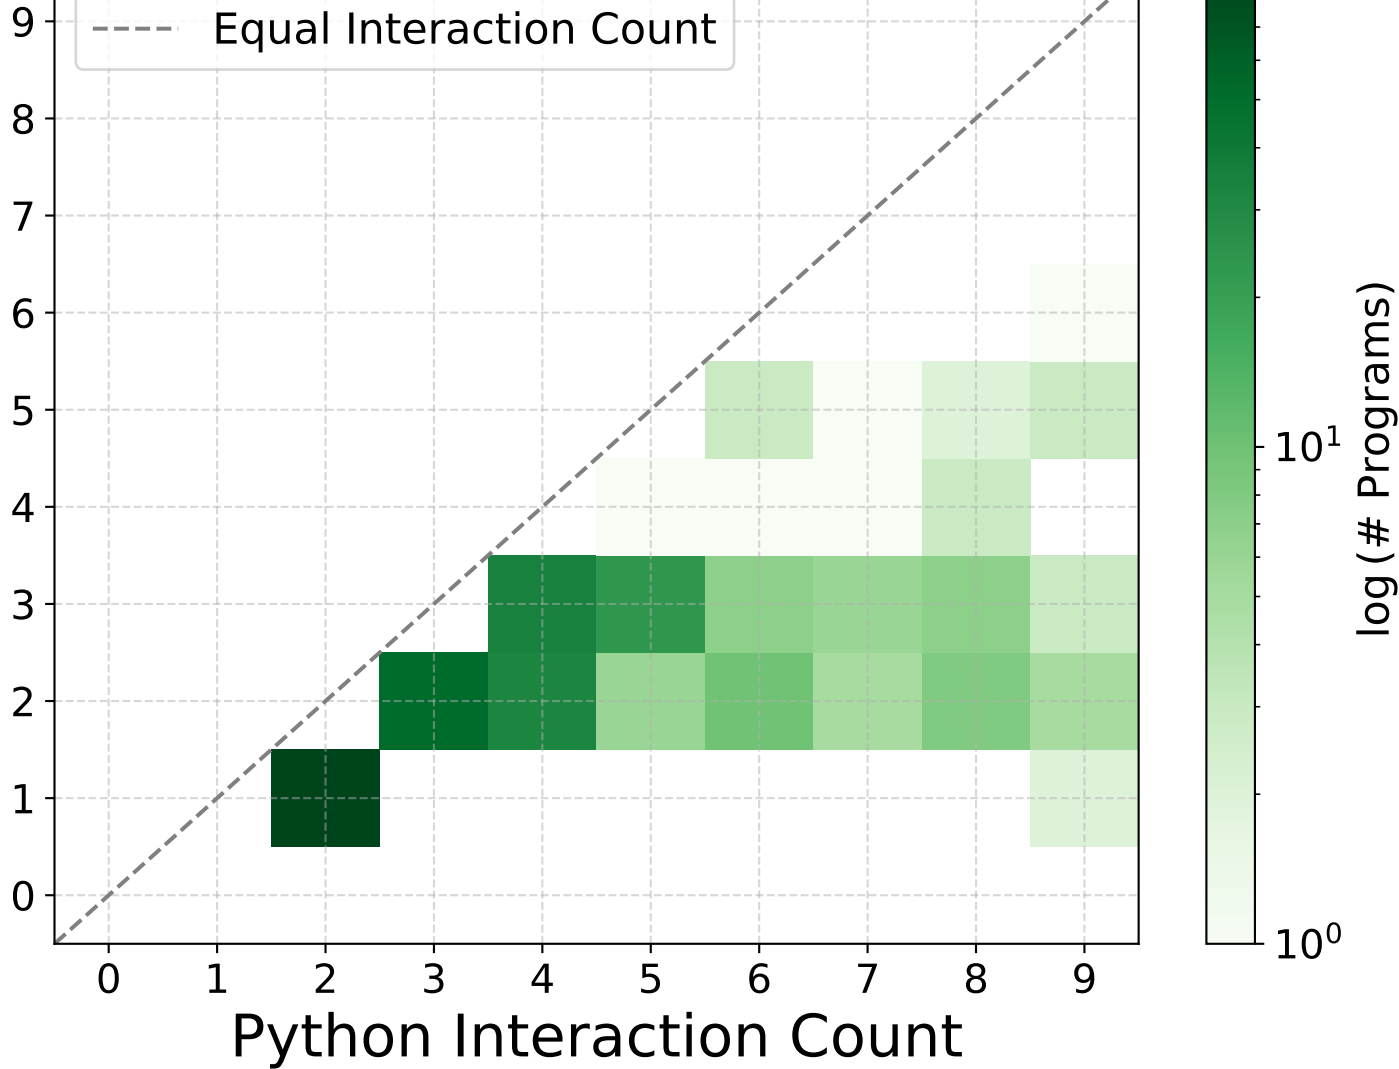

Supplement: supplementary_material [file improved_interaction_2d_histogram.pdf › quasar/datasets/gqa/plots/interactions/epic_compiled_rounds_4o_all_epic/improved_interaction_2d_histogram.pdf]

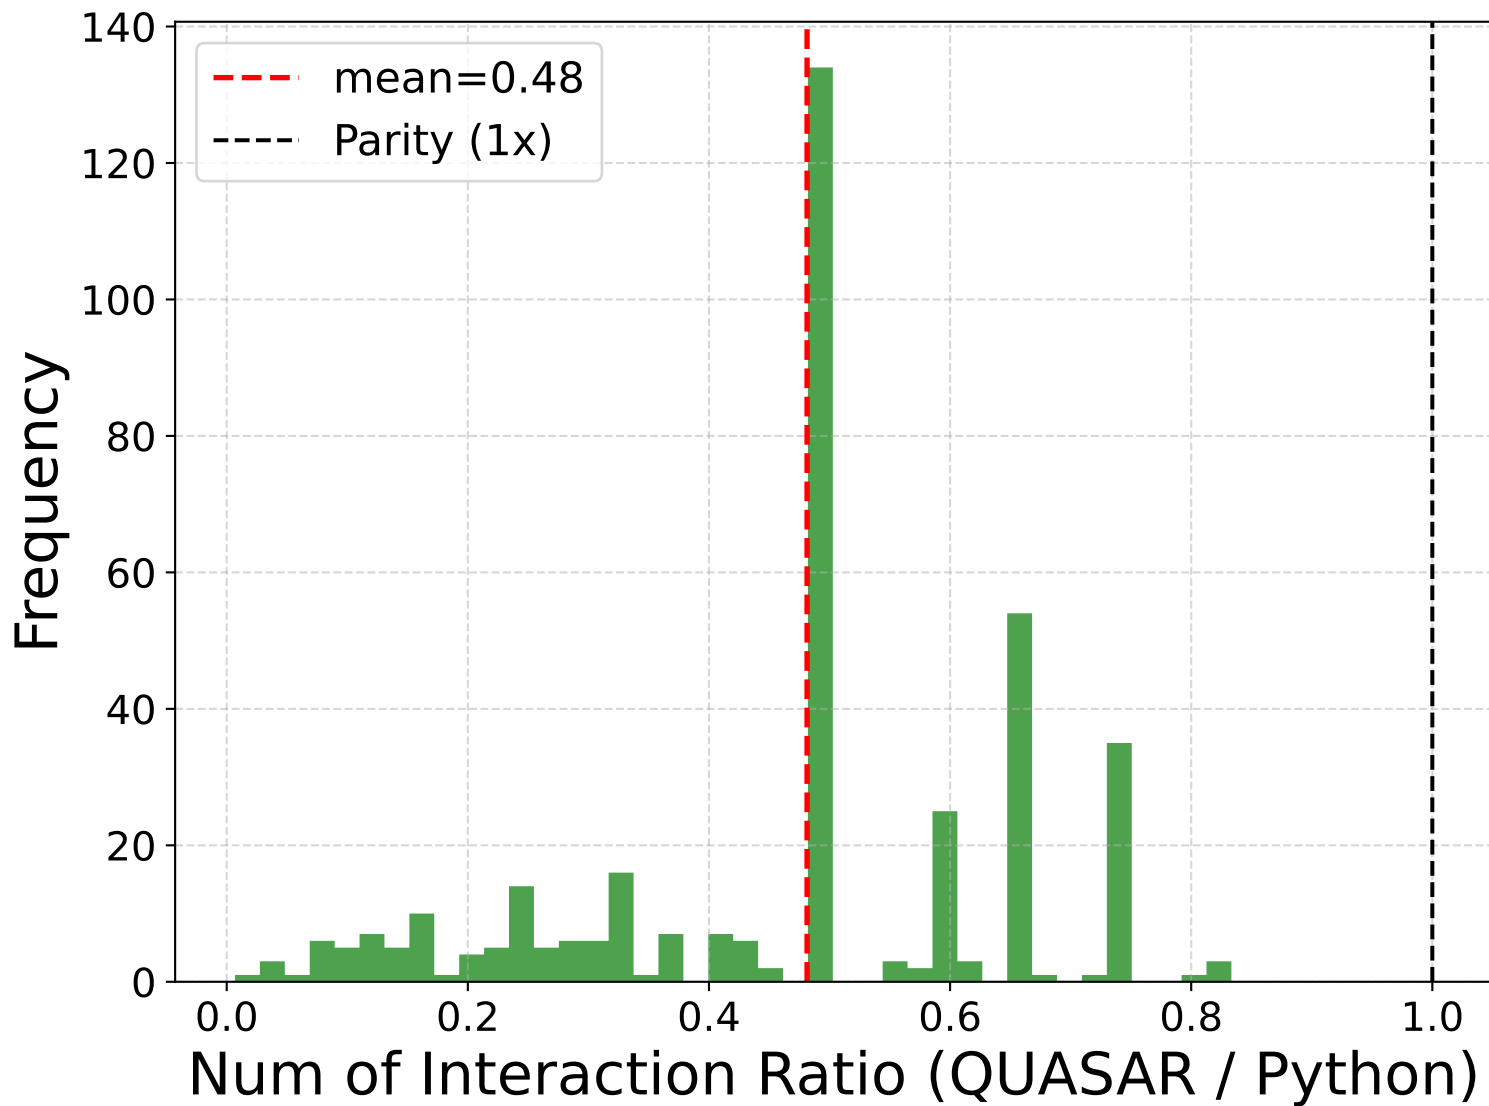

Supplement: supplementary_material [file improved_interaction_histogram.pdf › quasar/datasets/gqa/plots/interactions/epic_compiled_rounds_4o_all_epic/improved_interaction_histogram.pdf]

Frequency (log scale)

mean=0.48  
Parity (1x)

Num of Interaction Ratio (QUASAR / Python)

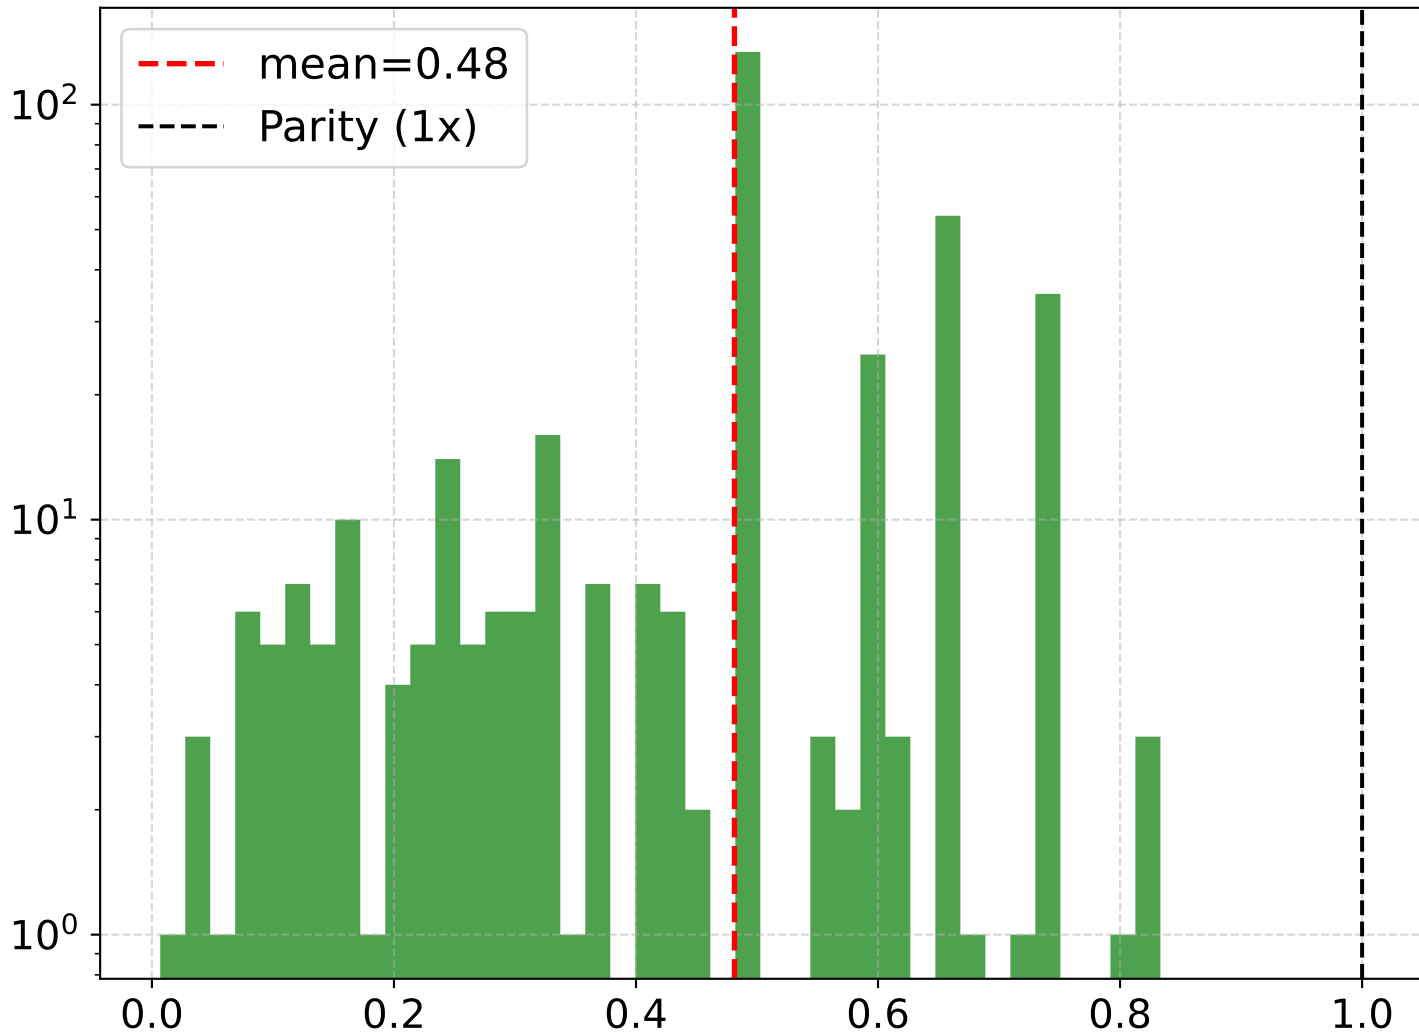

Supplement: supplementary_material [file improved_interaction_histogram_log.pdf › quasar/datasets/gqa/plots/interactions/epic_compiled_rounds_4o_all_epic/improved_interaction_histogram_log.pdf]

QUASAR Interaction Count

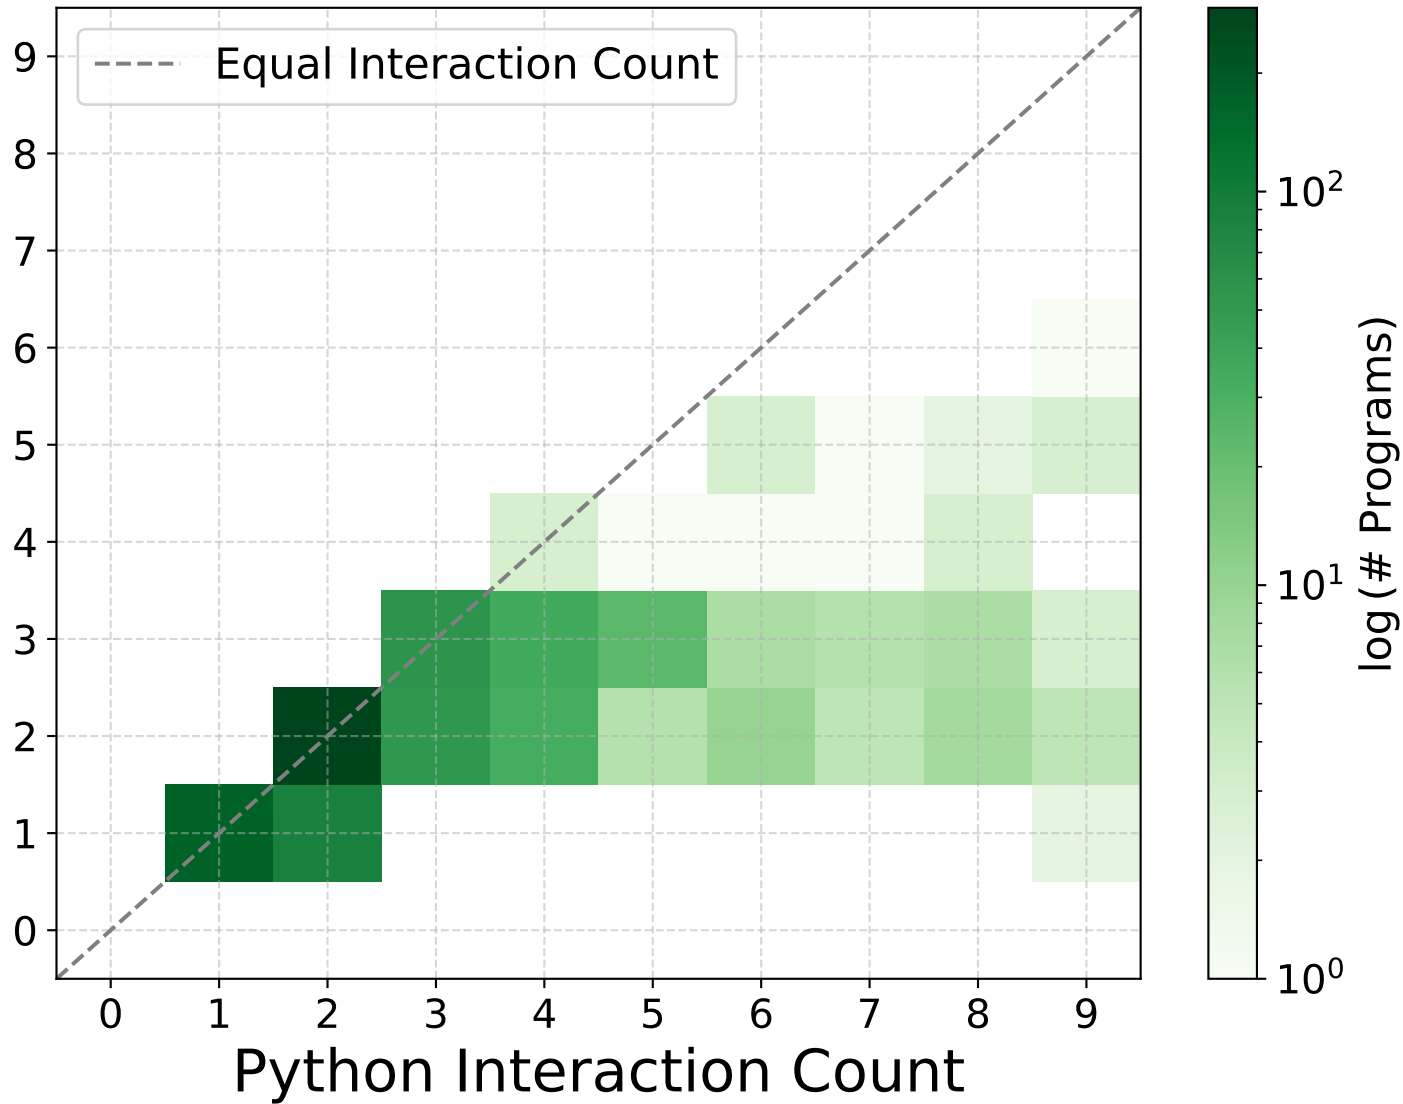

Supplement: supplementary_material [file interaction_2d_histogram.pdf › quasar/datasets/gqa/plots/interactions/epic_compiled_rounds_4o_all_epic/interaction_2d_histogram.pdf]

After Interaction Count

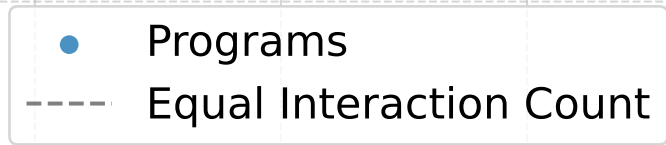

Before Interaction Count

Supplement: supplementary_material [file interaction_scatter_plot.pdf › quasar/datasets/gqa/plots/interactions/epic_compiled_rounds_4o_all_epic/interaction_scatter_plot.pdf]

All Interaction Improvement Factor (906 out of 906 - 100.00%)

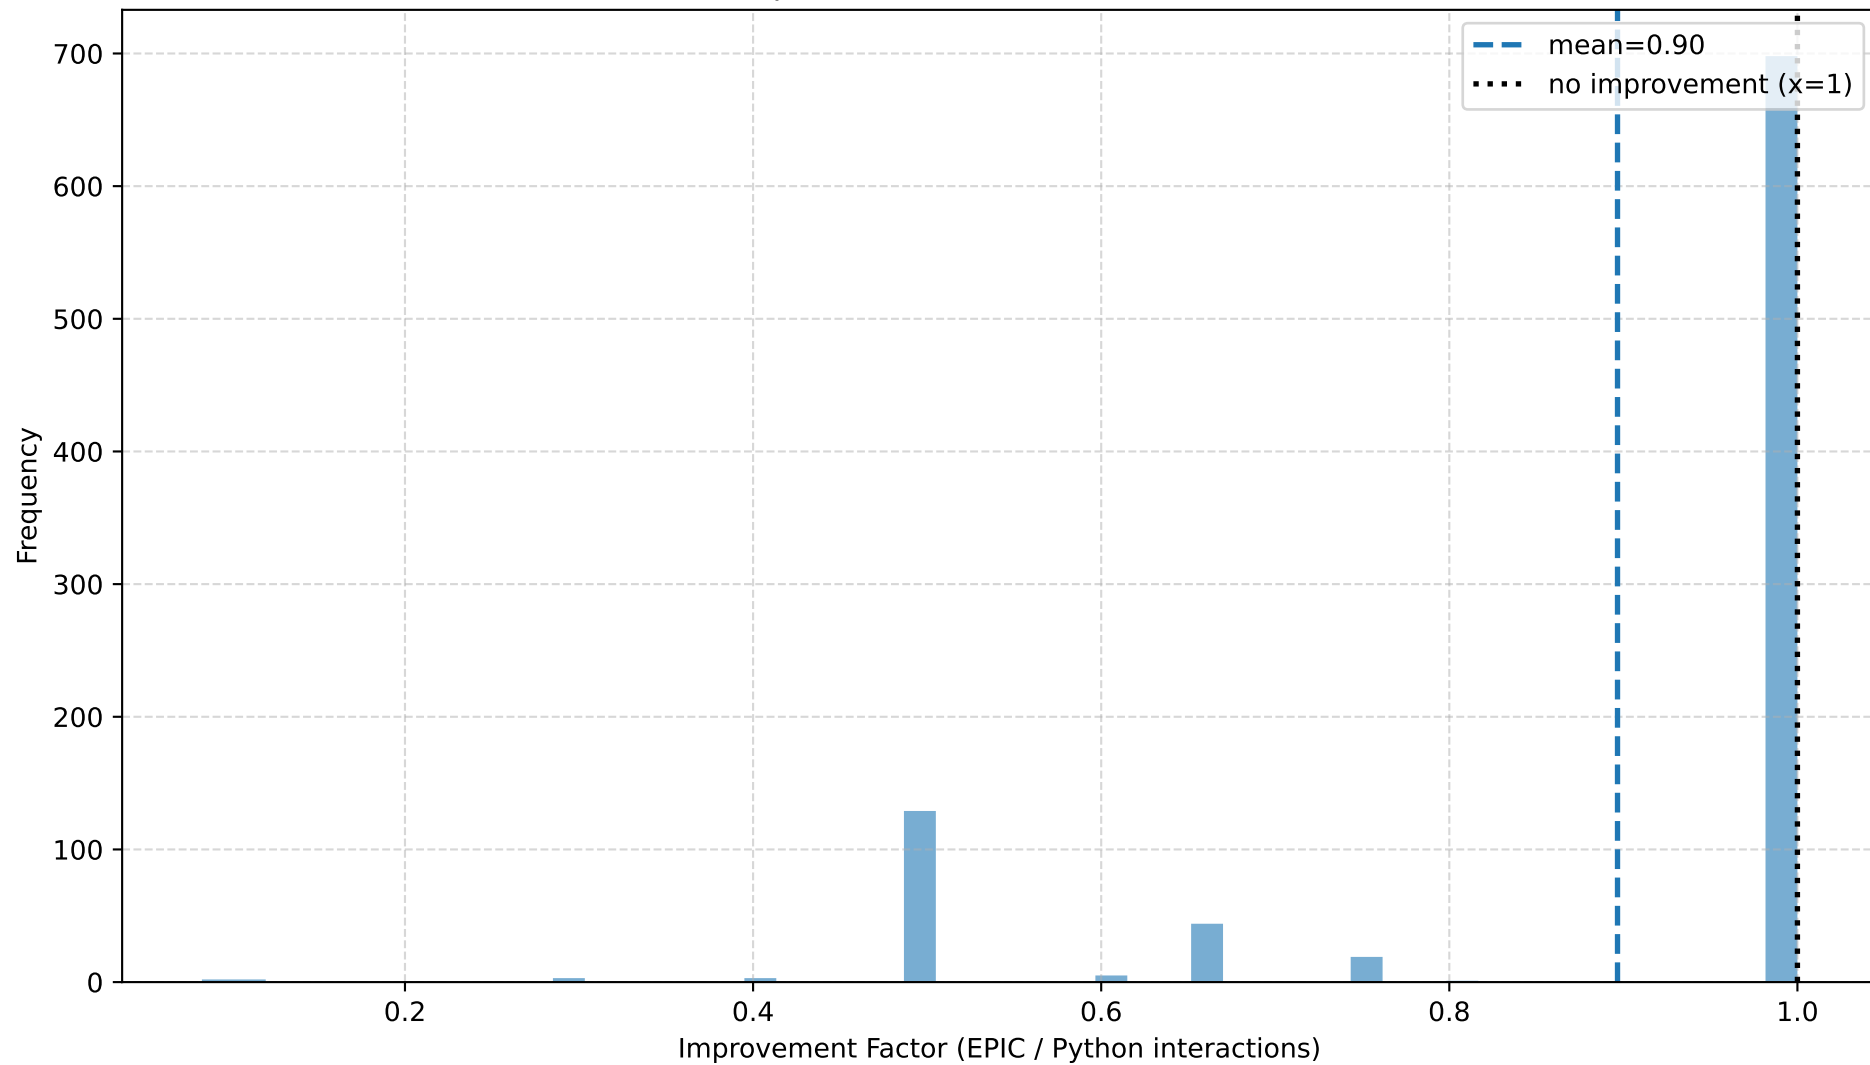

Supplement: supplementary_material [file all_interaction_histogram.pdf › quasar/datasets/gqa/plots/interactions/epic_compiled_rounds_4o_epic/all_interaction_histogram.pdf]

All Interaction Improvement Factor (Log Scale) (906 out of 906 - 100.00%)

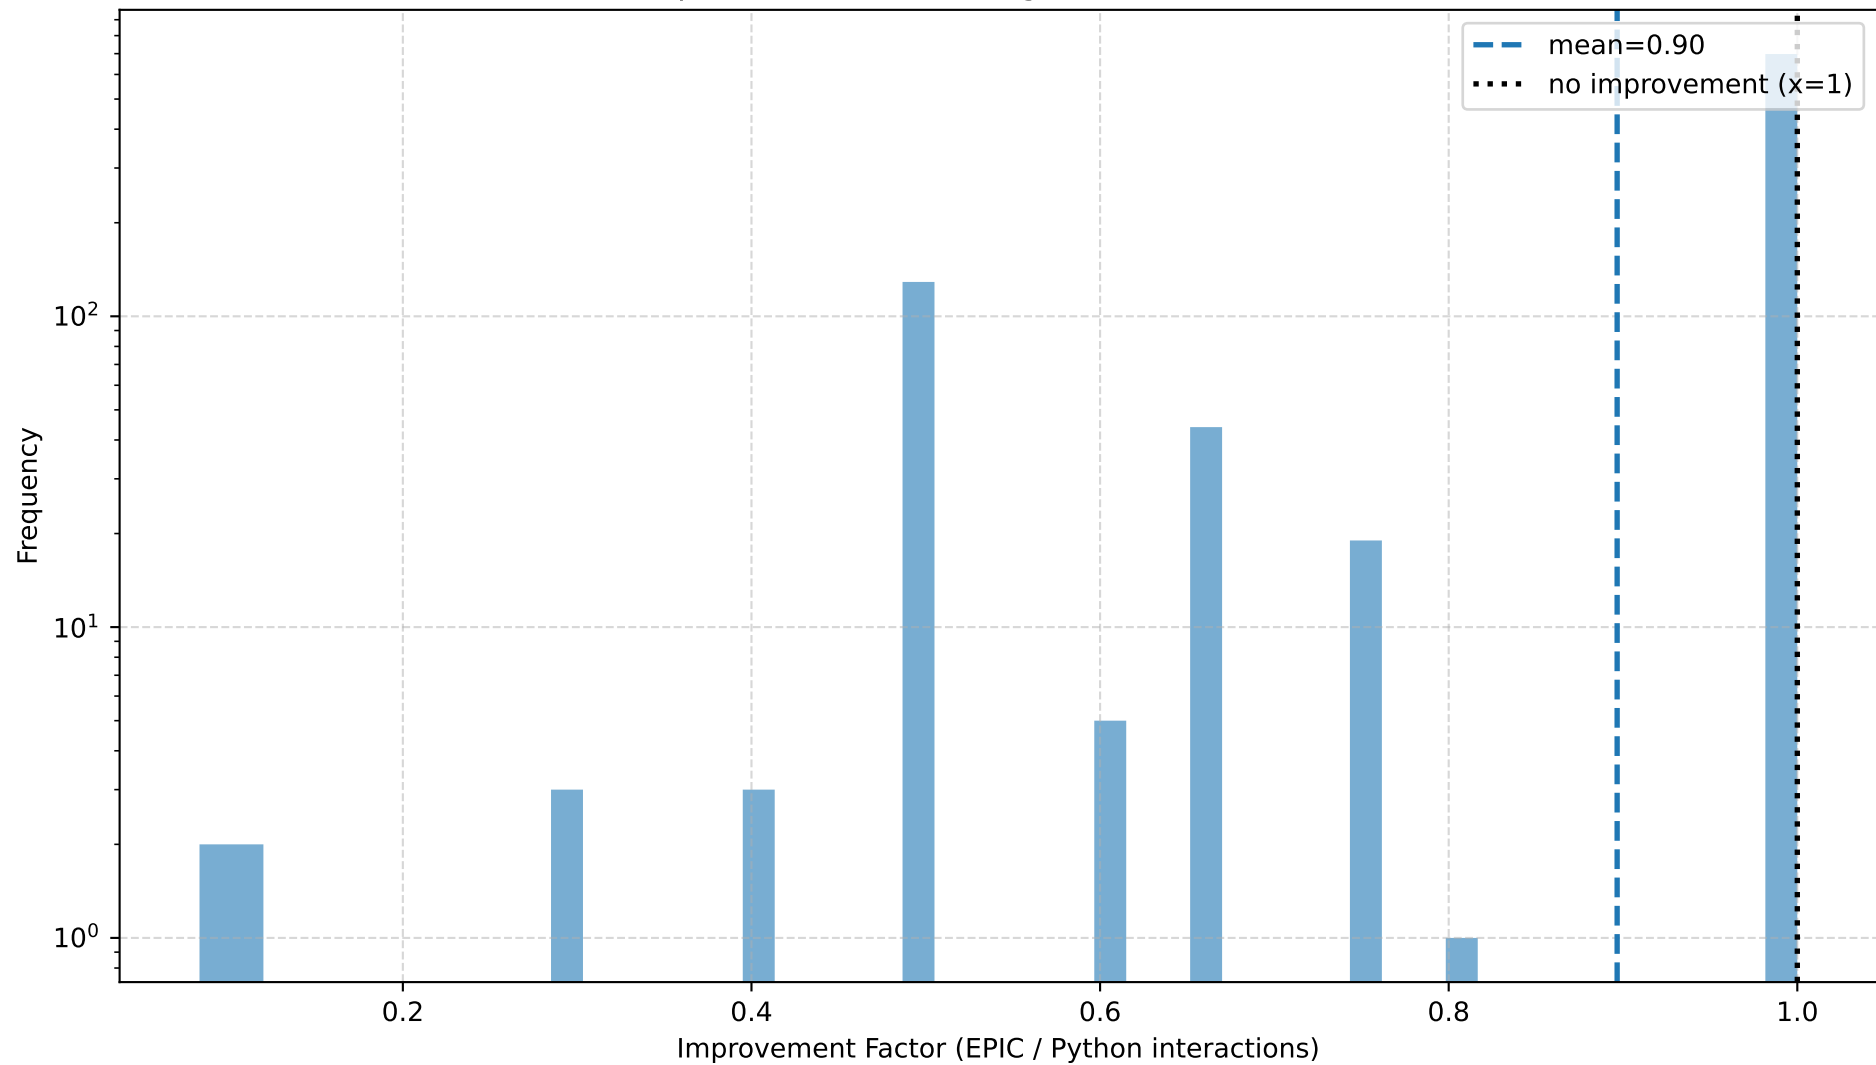

Supplement: supplementary_material [file all_interaction_histogram_log.pdf › quasar/datasets/gqa/plots/interactions/epic_compiled_rounds_4o_epic/all_interaction_histogram_log.pdf]

Improved Interaction Improvement Factor (208 out of 906 - 22.96%)

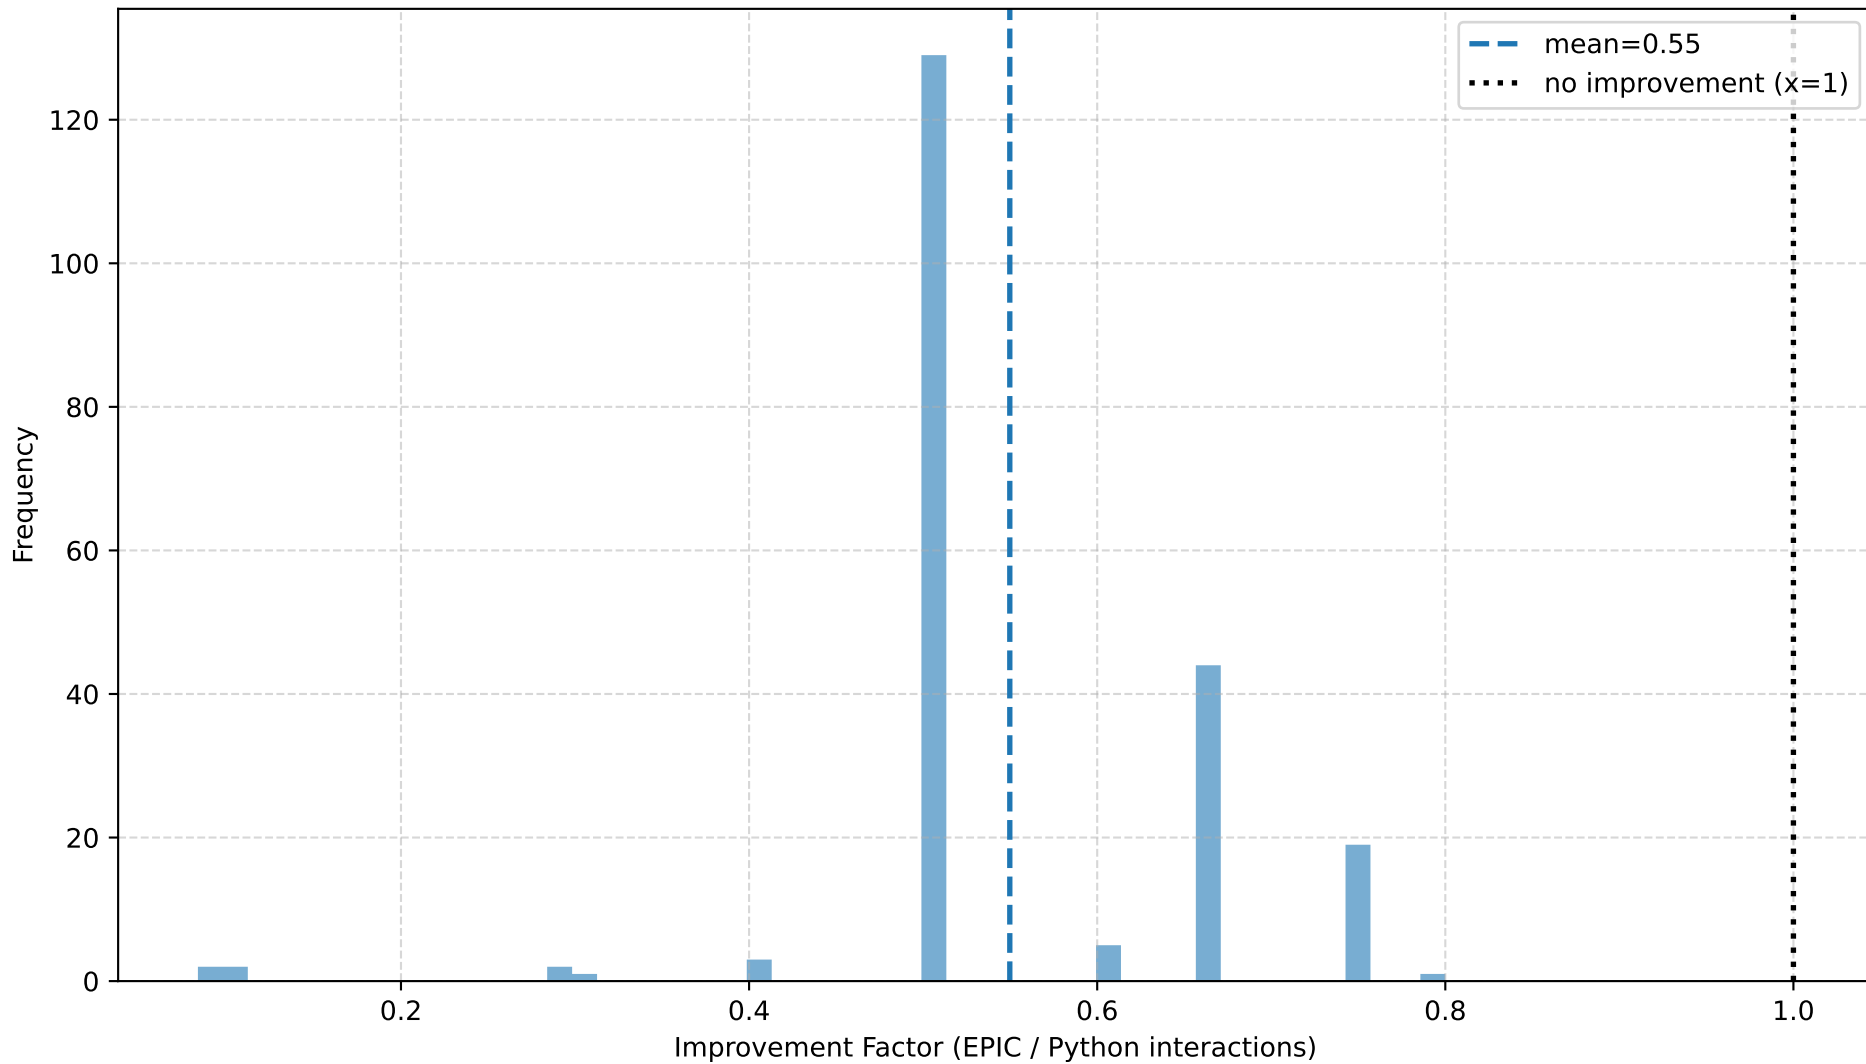

Supplement: supplementary_material [file improved_interaction_histogram.pdf › quasar/datasets/gqa/plots/interactions/epic_compiled_rounds_4o_epic/improved_interaction_histogram.pdf]

Improved Interaction Improvement Factor (Log Scale) (208 out of 906 - 22.96%)

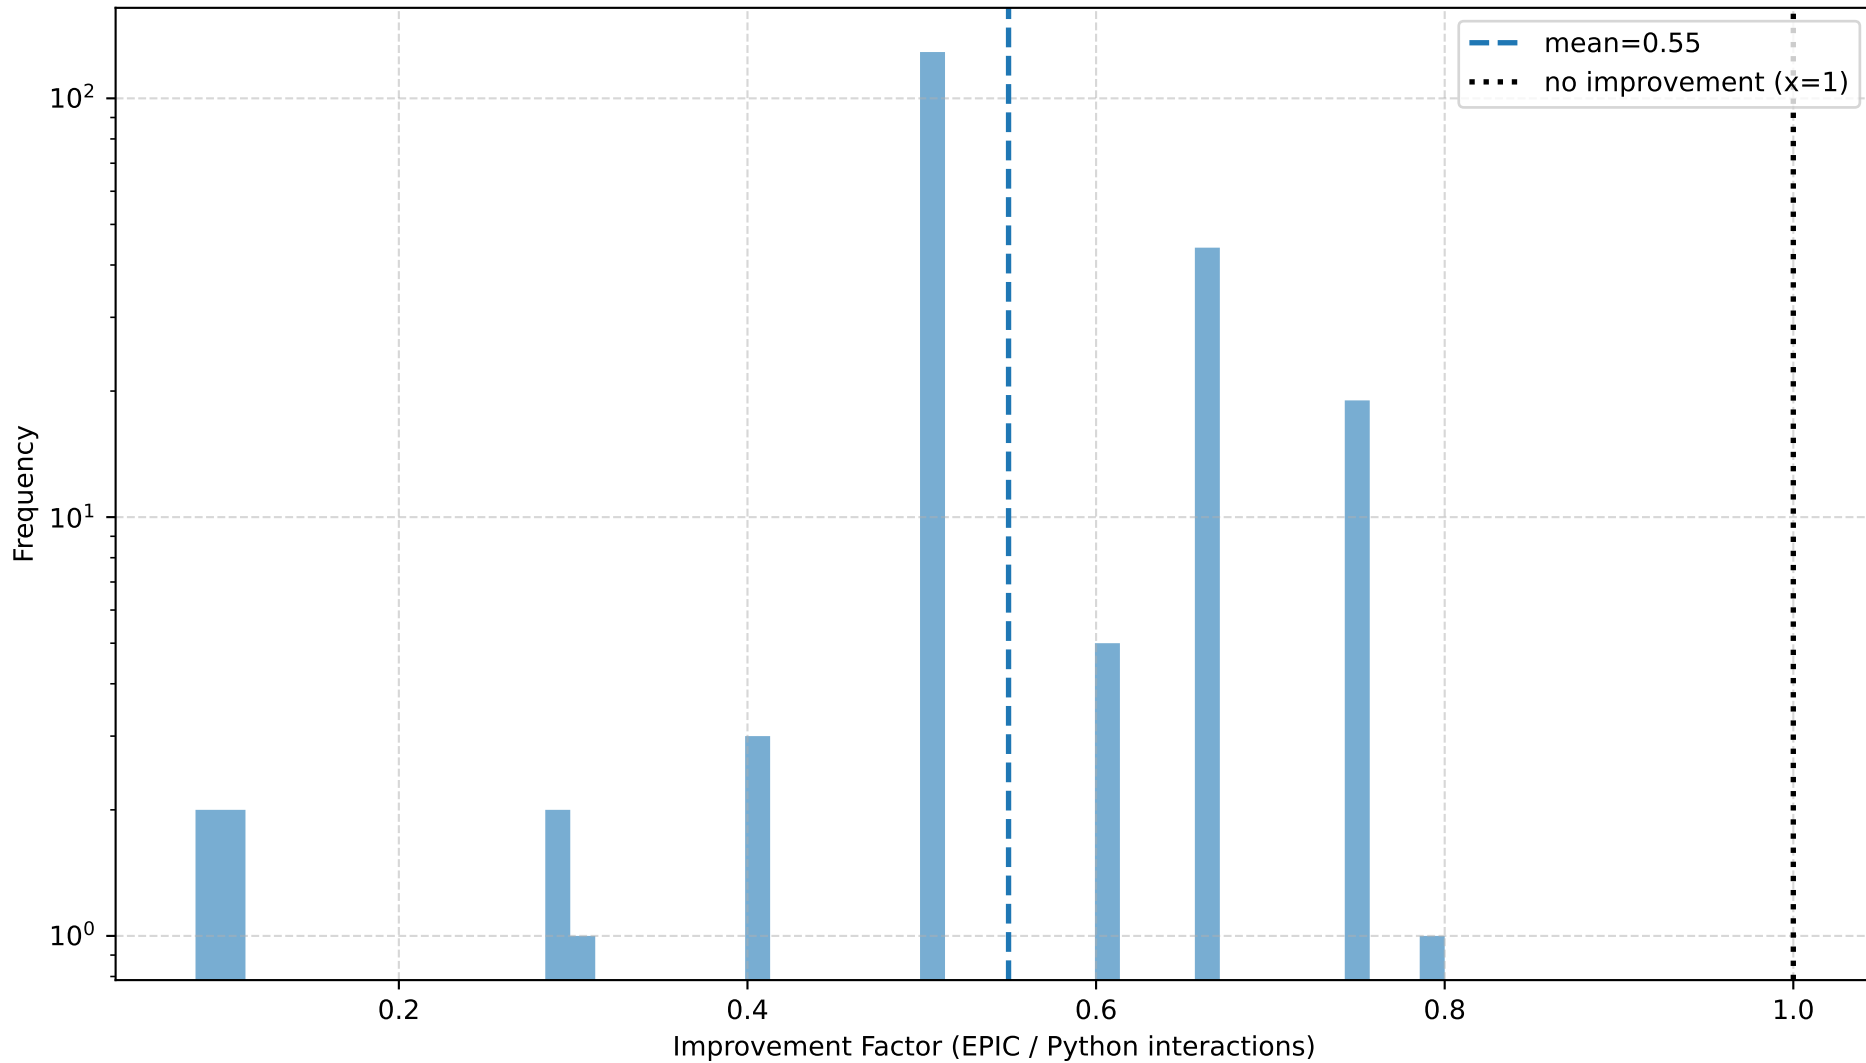

Supplement: supplementary_material [file improved_interaction_histogram_log.pdf › quasar/datasets/gqa/plots/interactions/epic_compiled_rounds_4o_epic/improved_interaction_histogram_log.pdf]

# 2D Histogram: Before vs After Interaction Counts

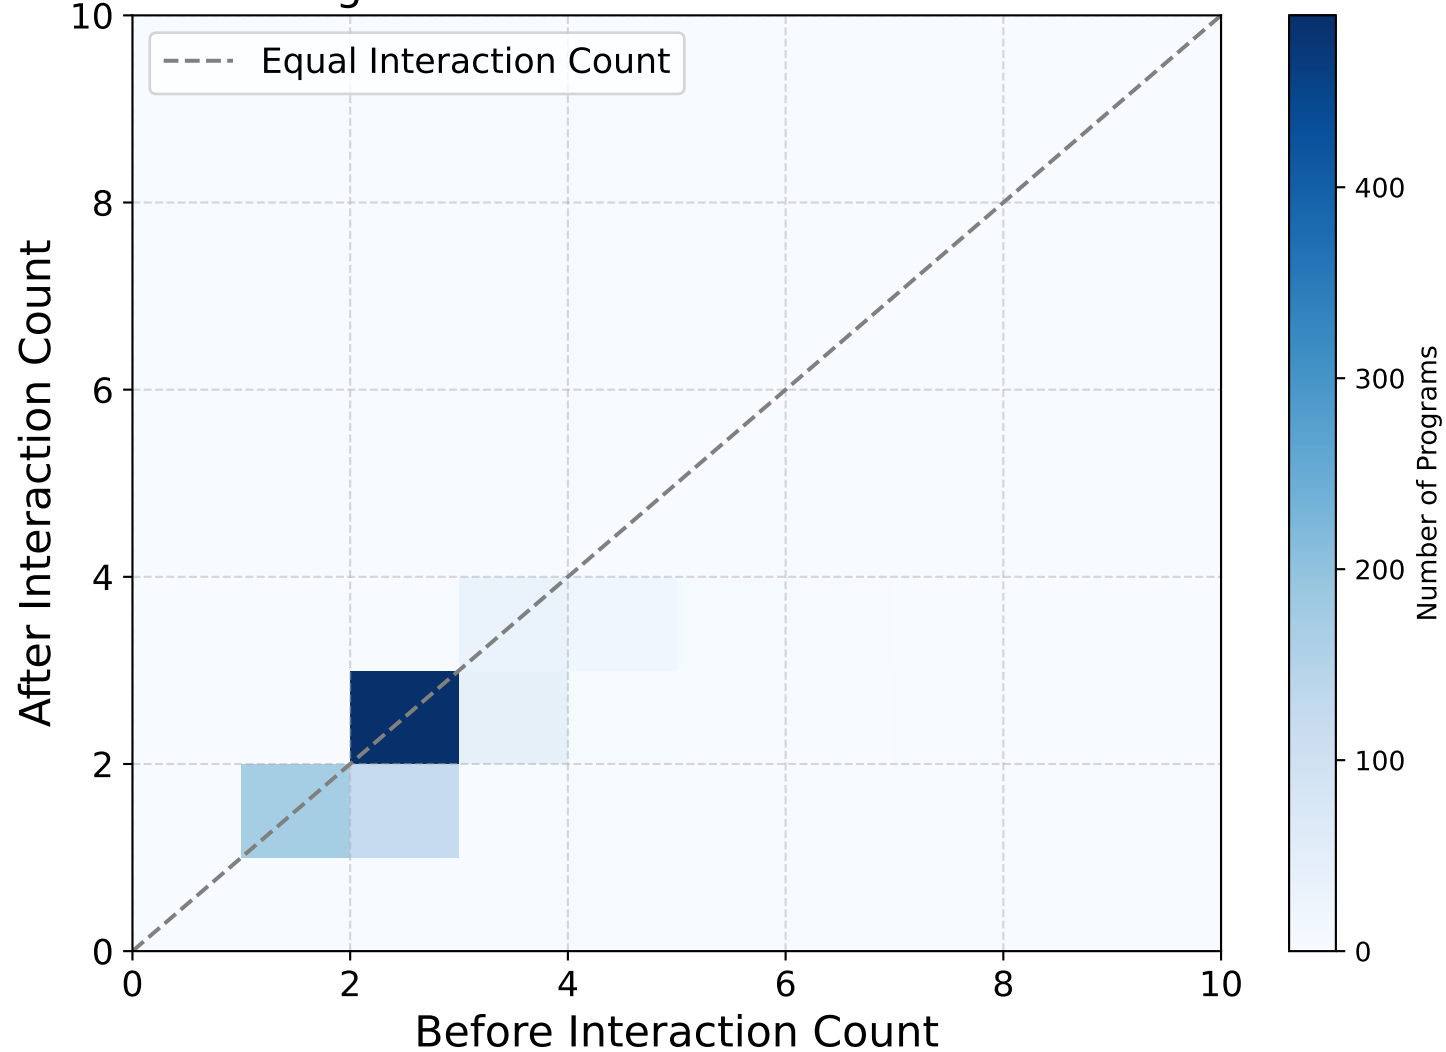

Supplement: supplementary_material [file interaction_2d_histogram.pdf › quasar/datasets/gqa/plots/interactions/epic_compiled_rounds_4o_epic/interaction_2d_histogram.pdf]

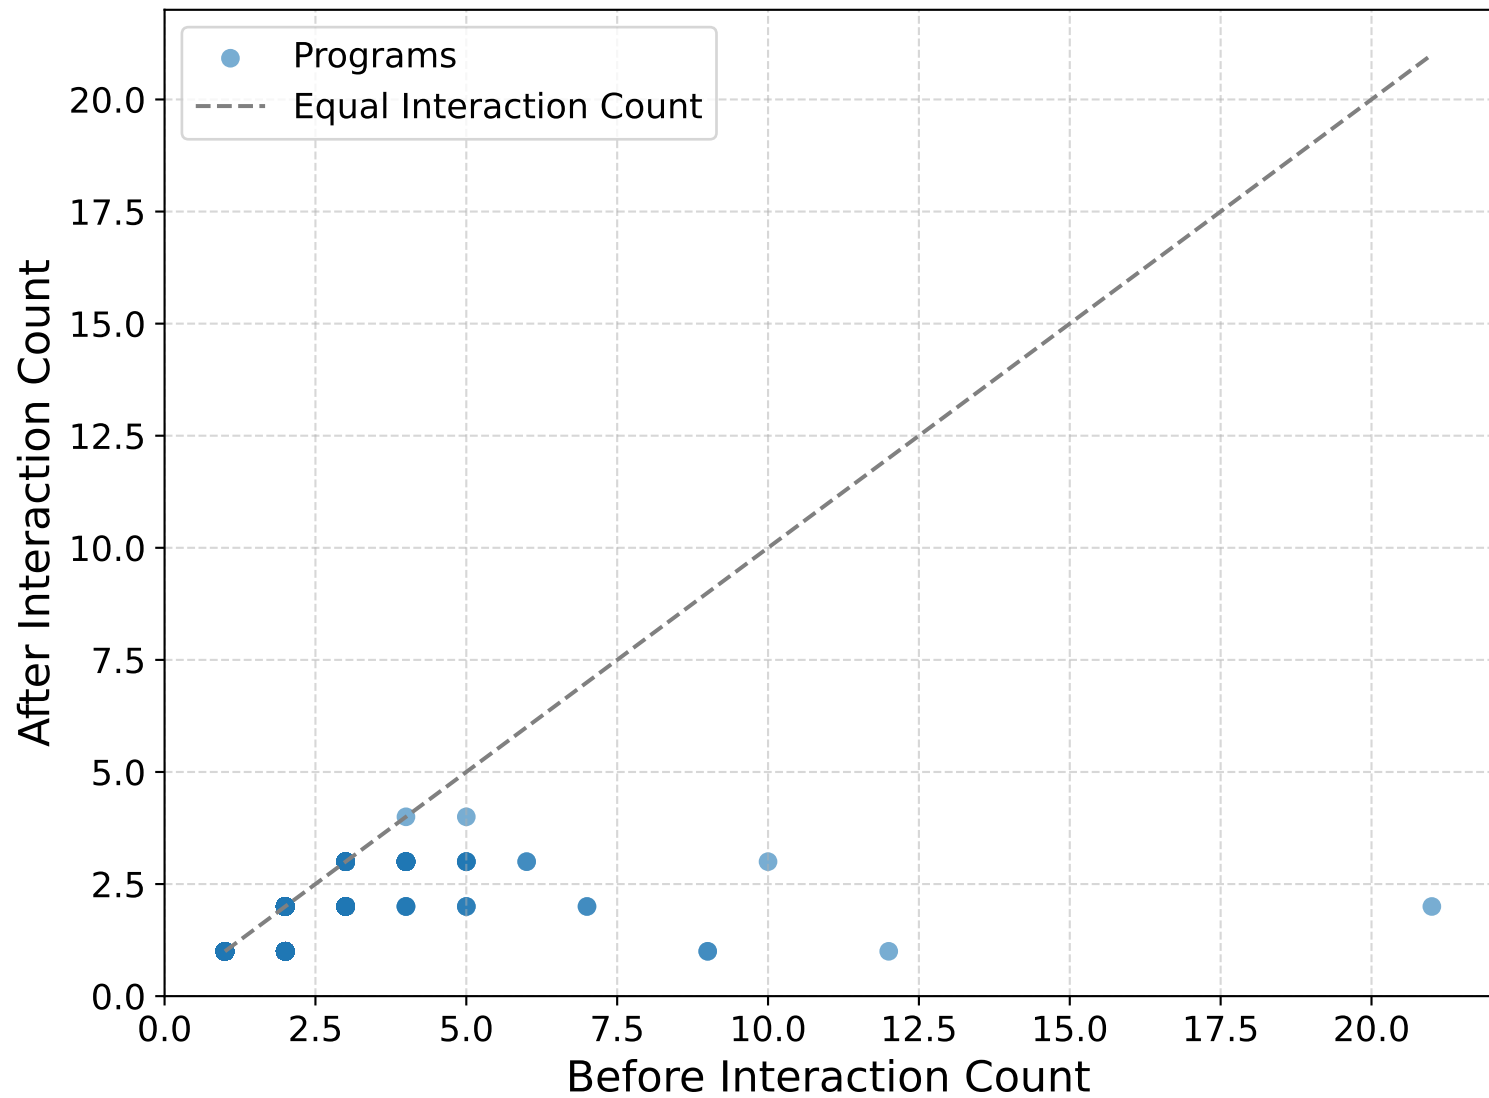

Supplement: supplementary_material [file interaction_scatter_plot.pdf › quasar/datasets/gqa/plots/interactions/epic_compiled_rounds_4o_epic/interaction_scatter_plot.pdf]

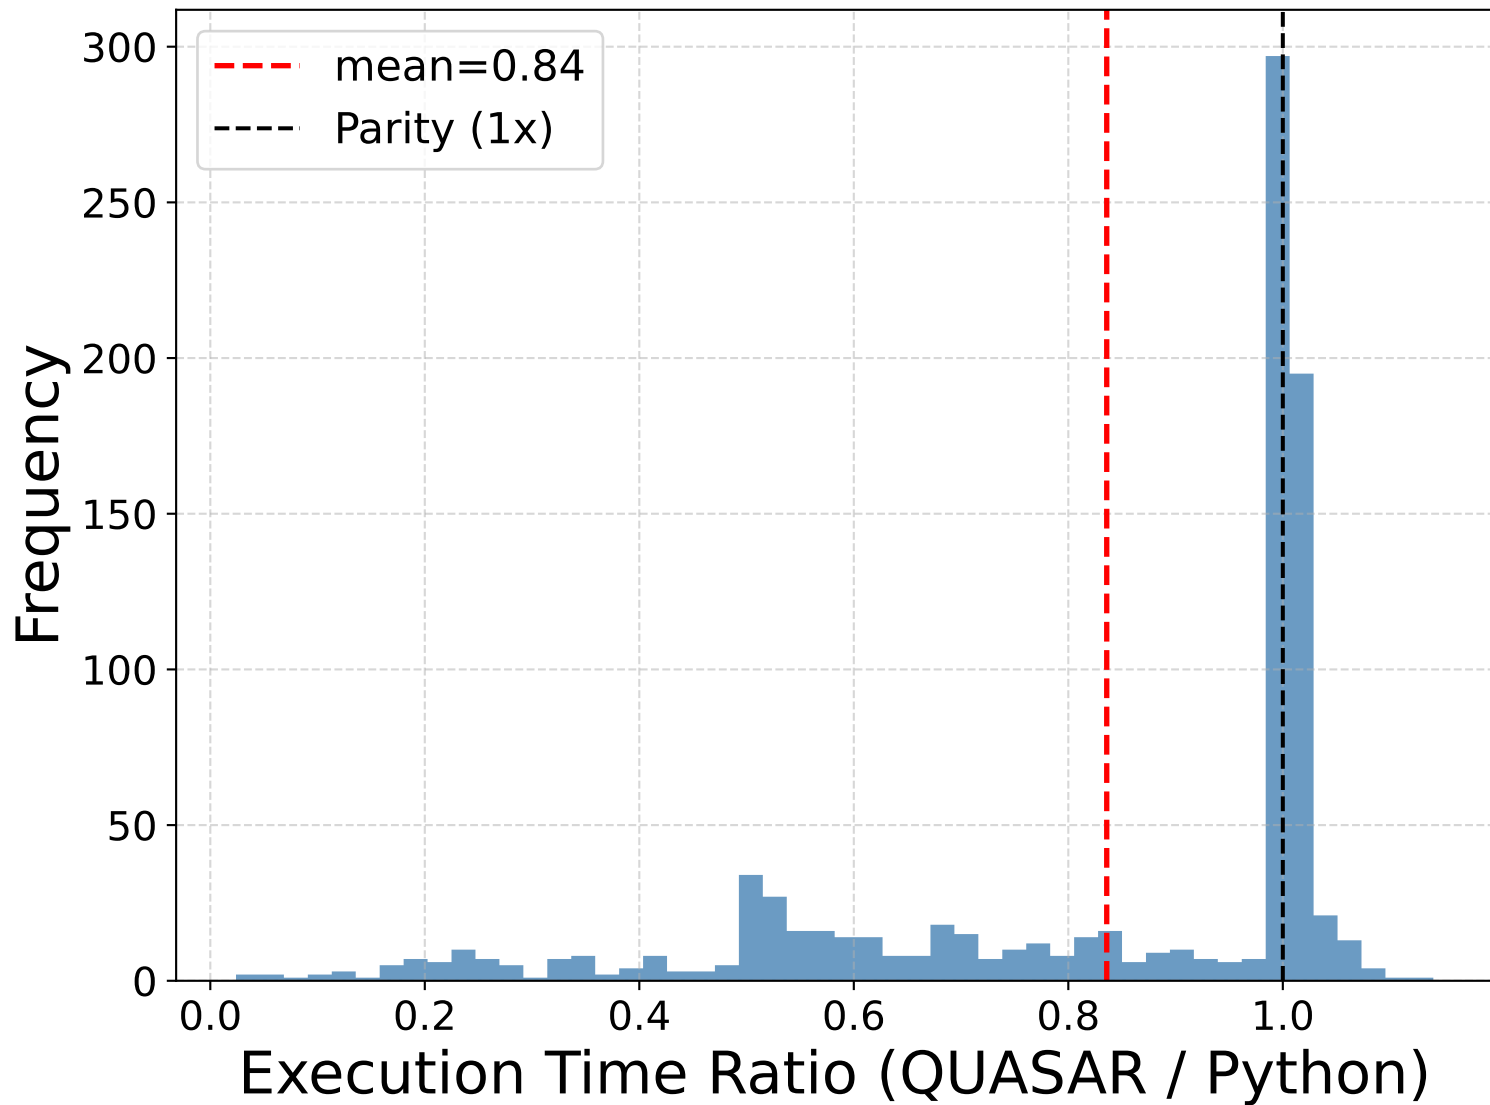

Supplement: supplementary_material [file all_runtime_ratio_histogram.pdf › quasar/datasets/gqa/plots/runtime/exec_4o_all_epic_replay/baseline_epic_compiled_exec_4o_all_py_replay/all_runtime_ratio_histogram.pdf]

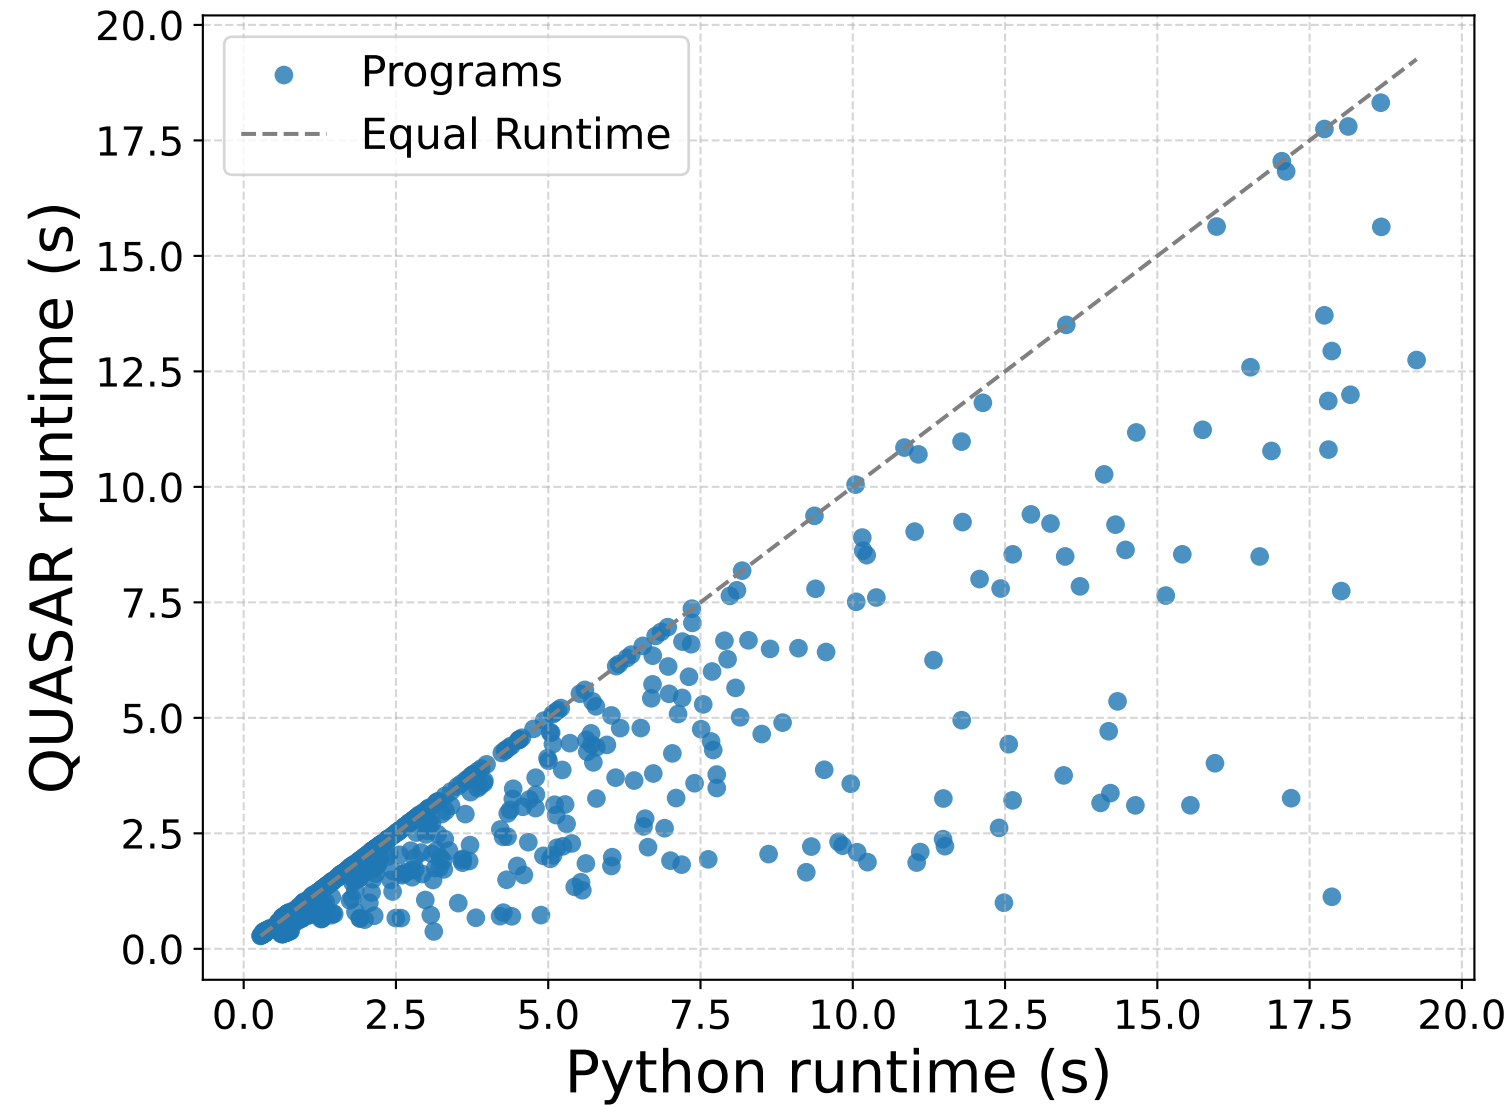

Supplement: supplementary_material [file all_runtime_scatter.pdf › quasar/datasets/gqa/plots/runtime/exec_4o_all_epic_replay/baseline_epic_compiled_exec_4o_all_py_replay/all_runtime_scatter.pdf]

QUASAR runtime (s)

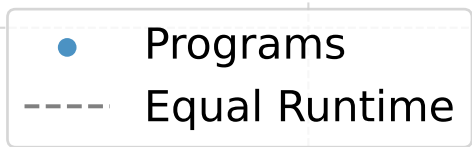

$10^0$

$10^1$

$10^2$

Python runtime (s)

Supplement: supplementary_material [file all_runtime_scatter_log.pdf › quasar/datasets/gqa/plots/runtime/exec_4o_all_epic_replay/baseline_epic_compiled_exec_4o_all_py_replay/all_runtime_scatter_log.pdf]

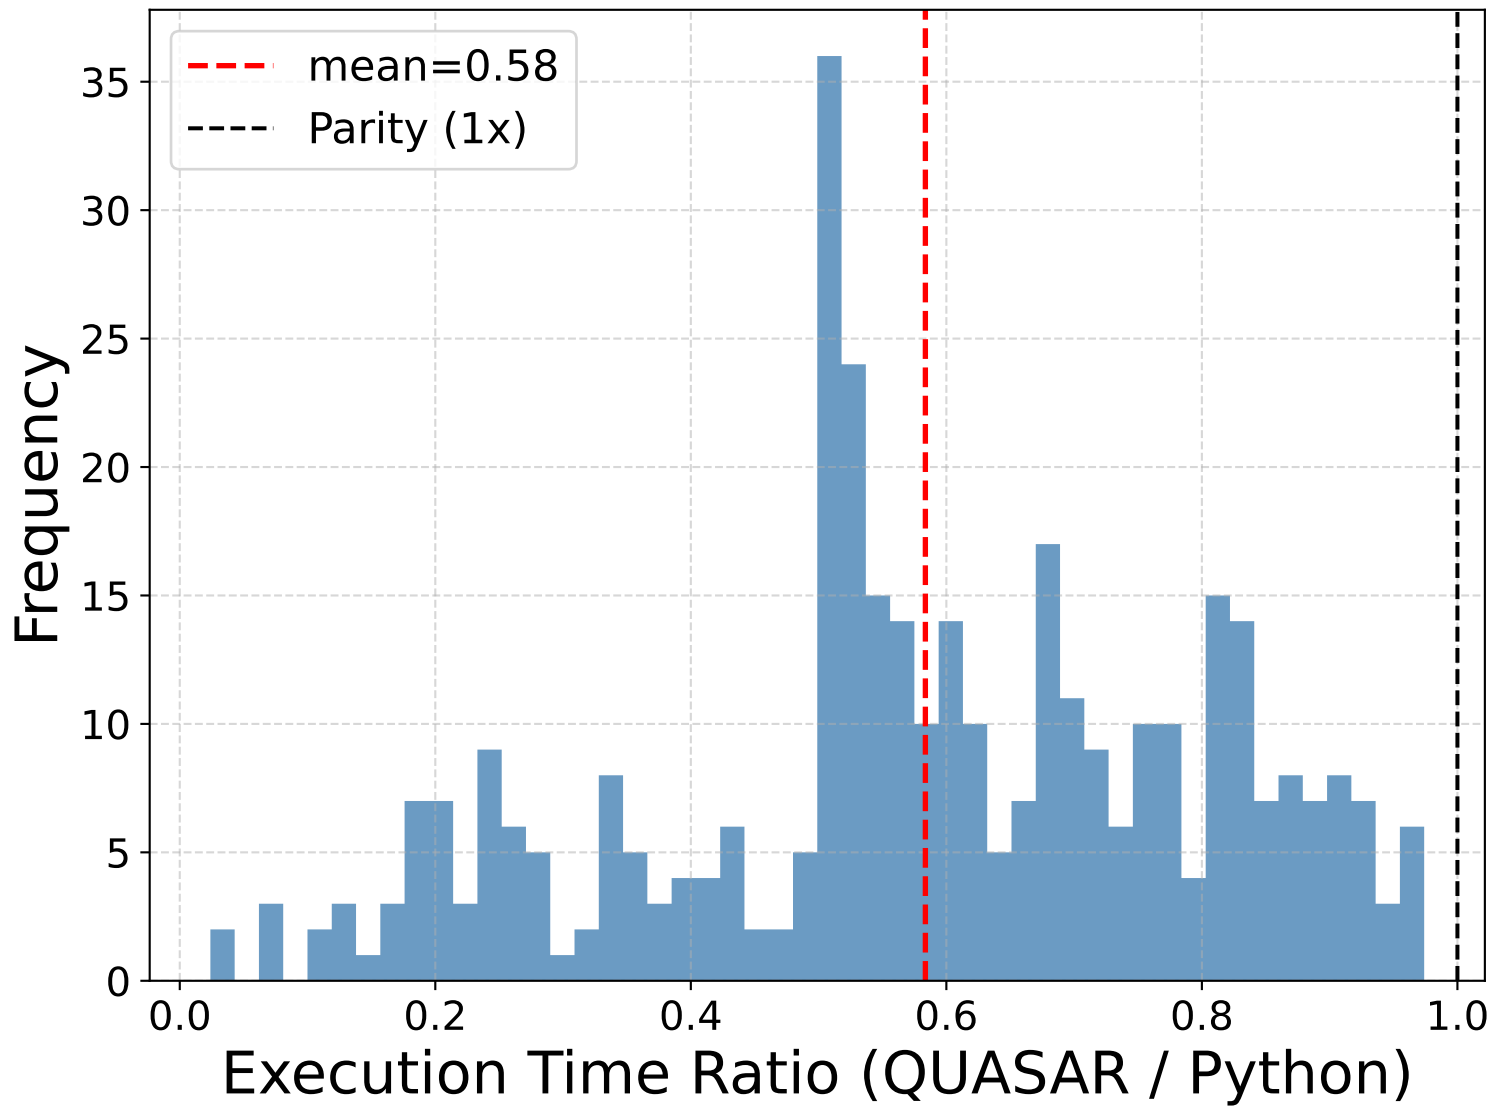

Supplement: supplementary_material [file improved_runtime_ratio_histogram.pdf › quasar/datasets/gqa/plots/runtime/exec_4o_all_epic_replay/baseline_epic_compiled_exec_4o_all_py_replay/improved_runtime_ratio_histogram.pdf]

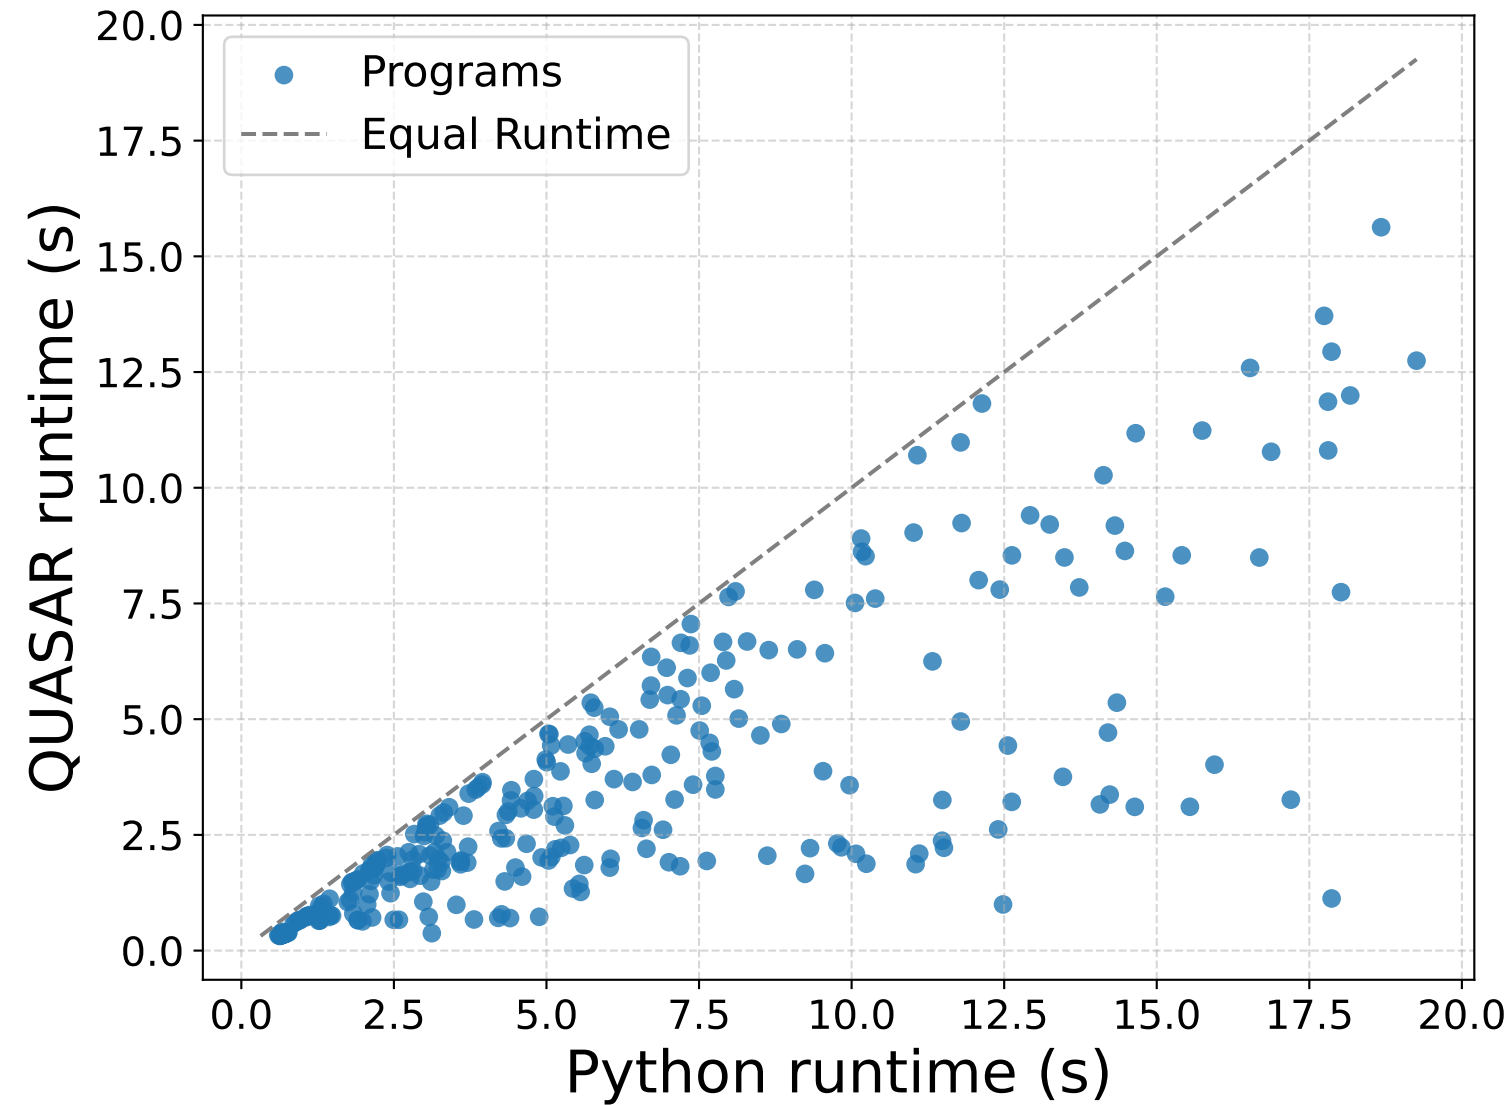

Supplement: supplementary_material [file improved_runtime_scatter.pdf › quasar/datasets/gqa/plots/runtime/exec_4o_all_epic_replay/baseline_epic_compiled_exec_4o_all_py_replay/improved_runtime_scatter.pdf]

QUASAR runtime (s)

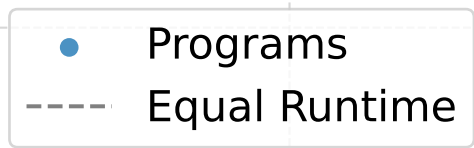

10<sup>0</sup>

10<sup>1</sup>

10<sup>2</sup>

Python runtime (s)

Supplement: supplementary_material [file improved_runtime_scatter_log.pdf › quasar/datasets/gqa/plots/runtime/exec_4o_all_epic_replay/baseline_epic_compiled_exec_4o_all_py_replay/improved_runtime_scatter_log.pdf]

Execution Time Comparison Boxplot

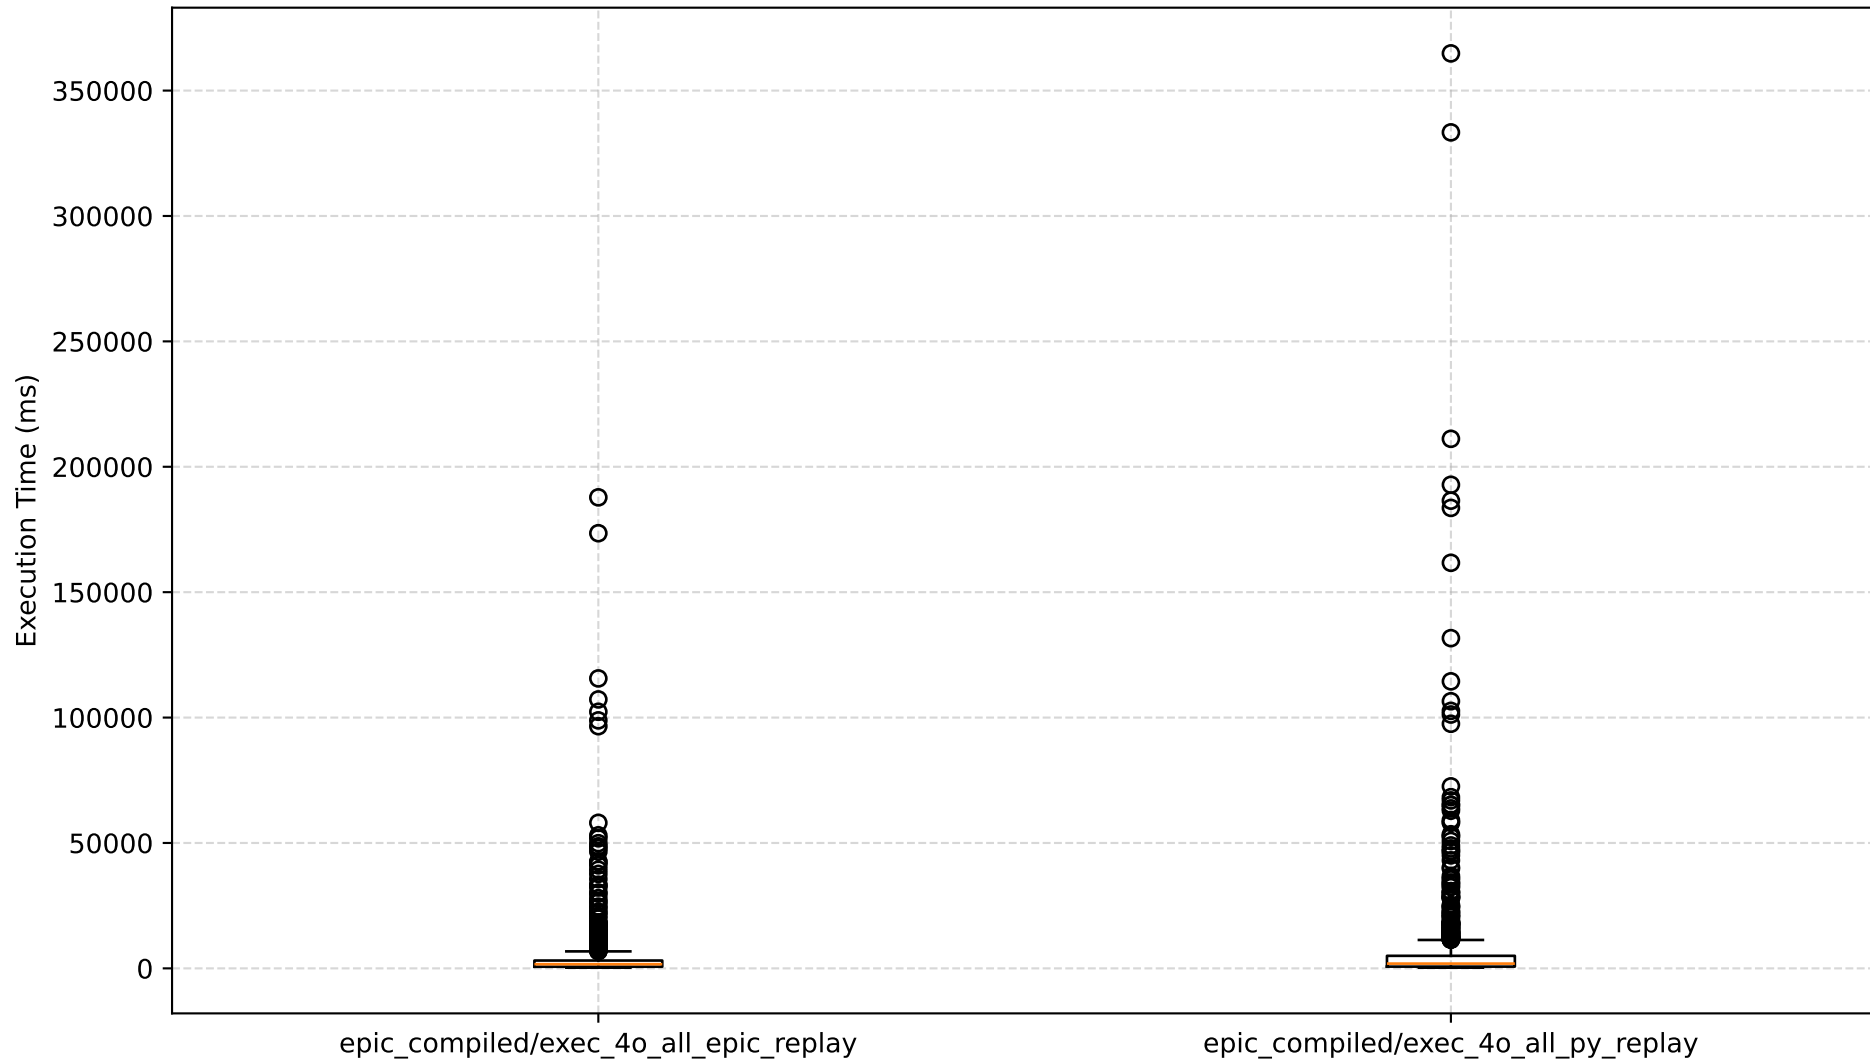

Supplement: supplementary_material [file runtime_boxplot.pdf › quasar/datasets/gqa/plots/runtime/exec_4o_all_epic_replay/baseline_epic_compiled_exec_4o_all_py_replay/runtime_boxplot.pdf]

Execution Time Comparison Density

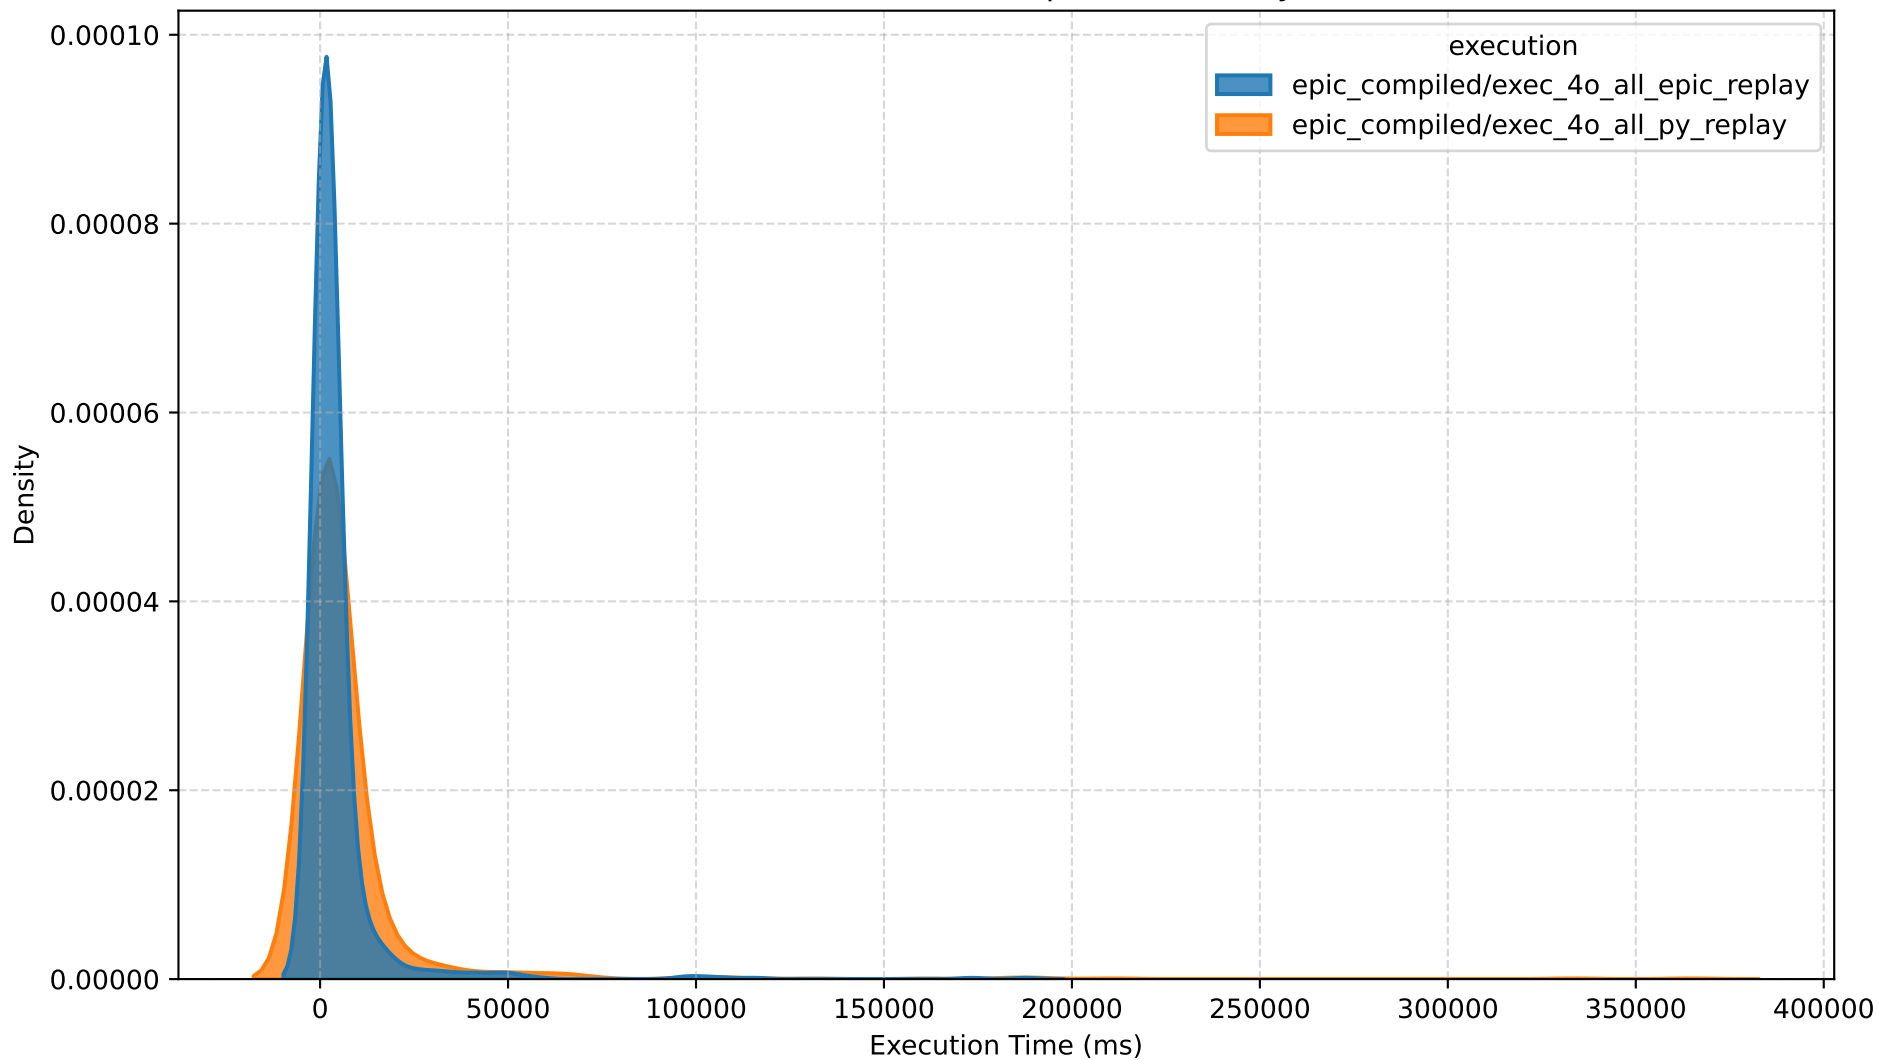

Supplement: supplementary_material [file runtime_density.pdf › quasar/datasets/gqa/plots/runtime/exec_4o_all_epic_replay/baseline_epic_compiled_exec_4o_all_py_replay/runtime_density.pdf]

# Execution Time Comparison Histogram

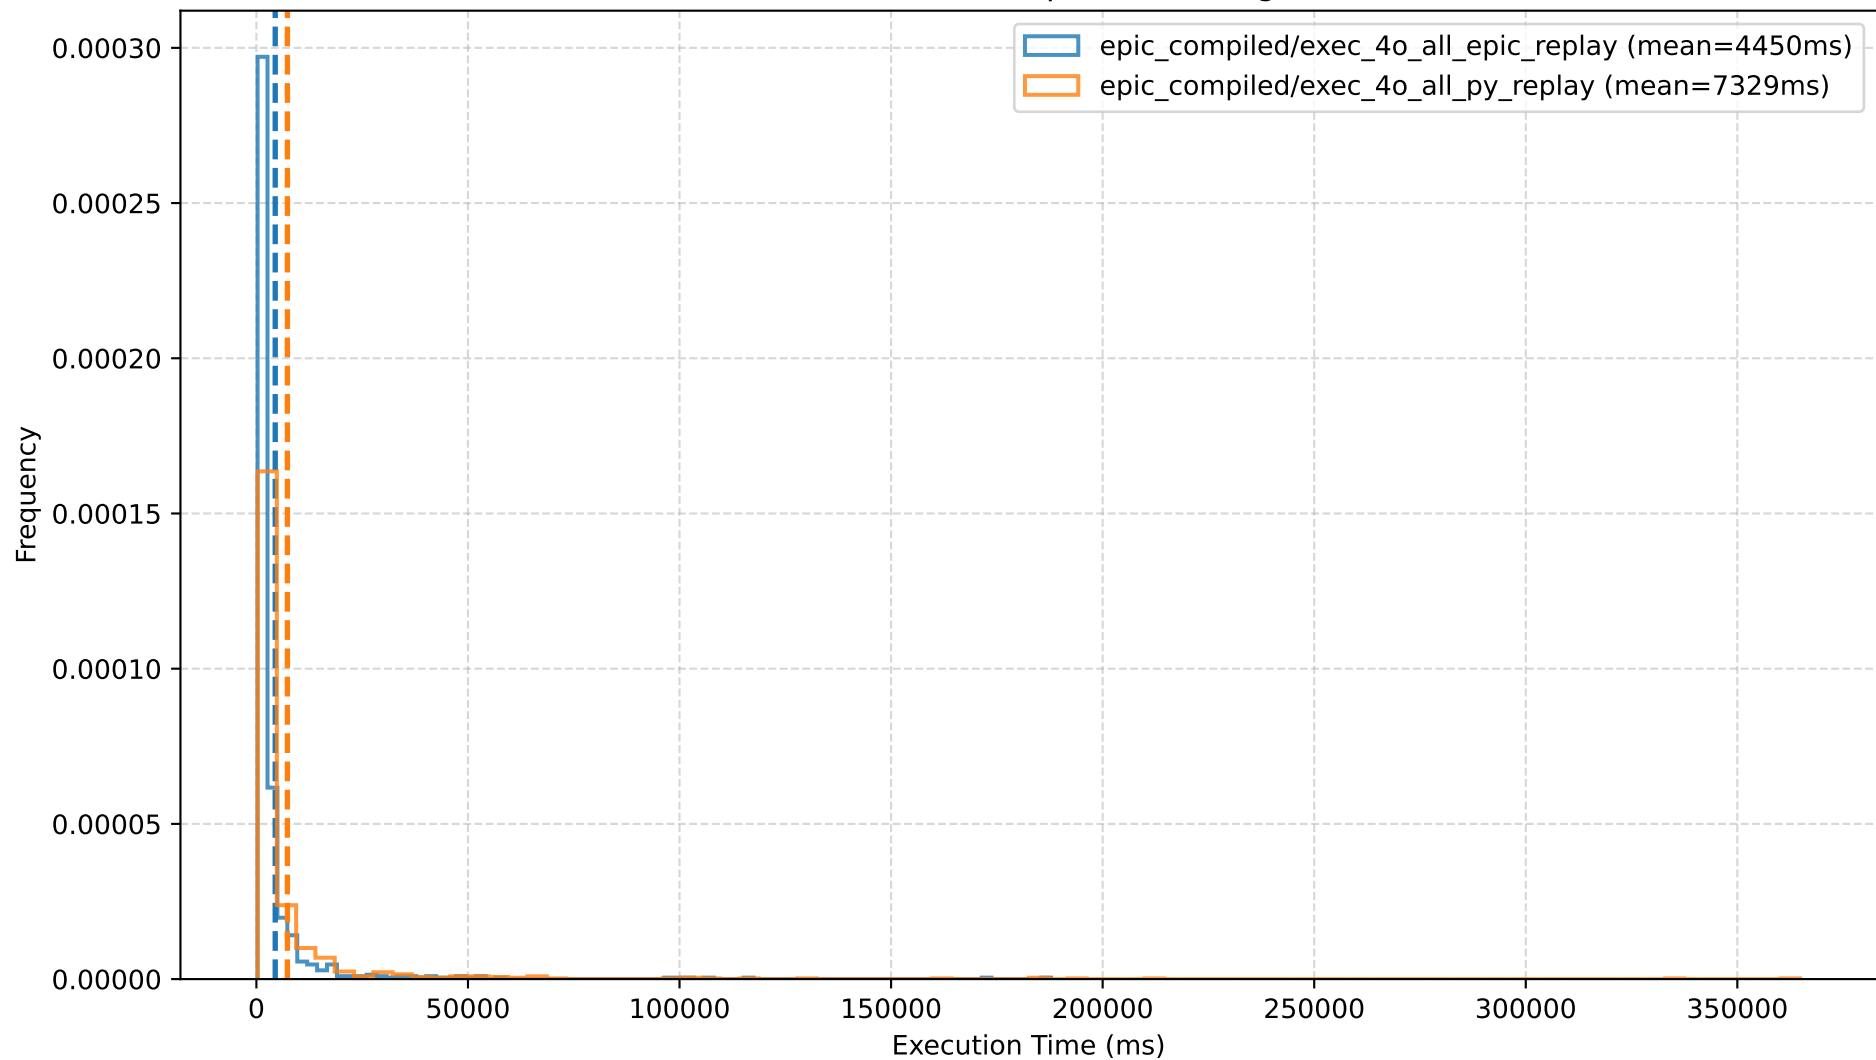

Supplement: supplementary_material [file runtime_histogram.pdf › quasar/datasets/gqa/plots/runtime/exec_4o_all_epic_replay/baseline_epic_compiled_exec_4o_all_py_replay/runtime_histogram.pdf]

# Execution Time Ratio

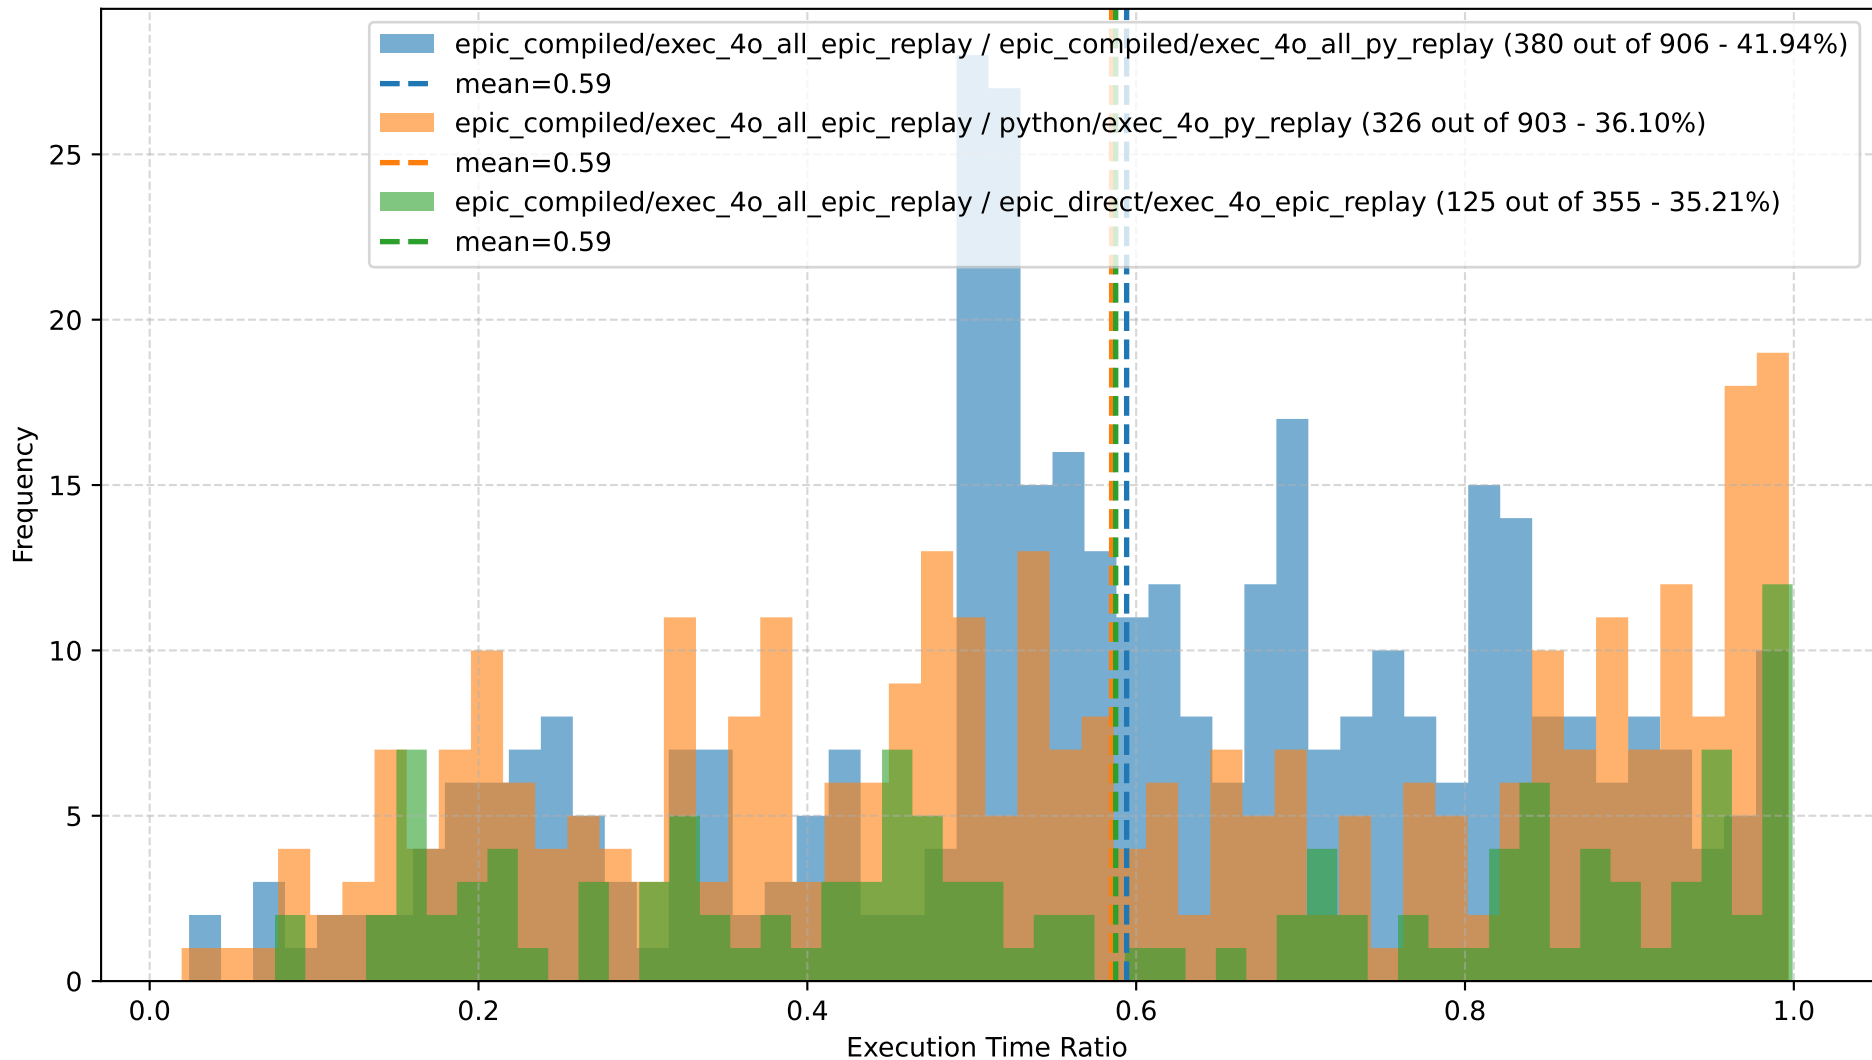

Supplement: supplementary_material [file ratio_histogram.pdf › quasar/datasets/gqa/plots/runtime/exec_4o_all_epic_replay/three_baselines/ratio_histogram.pdf]

# Execution Time Ratio (Log Scale)

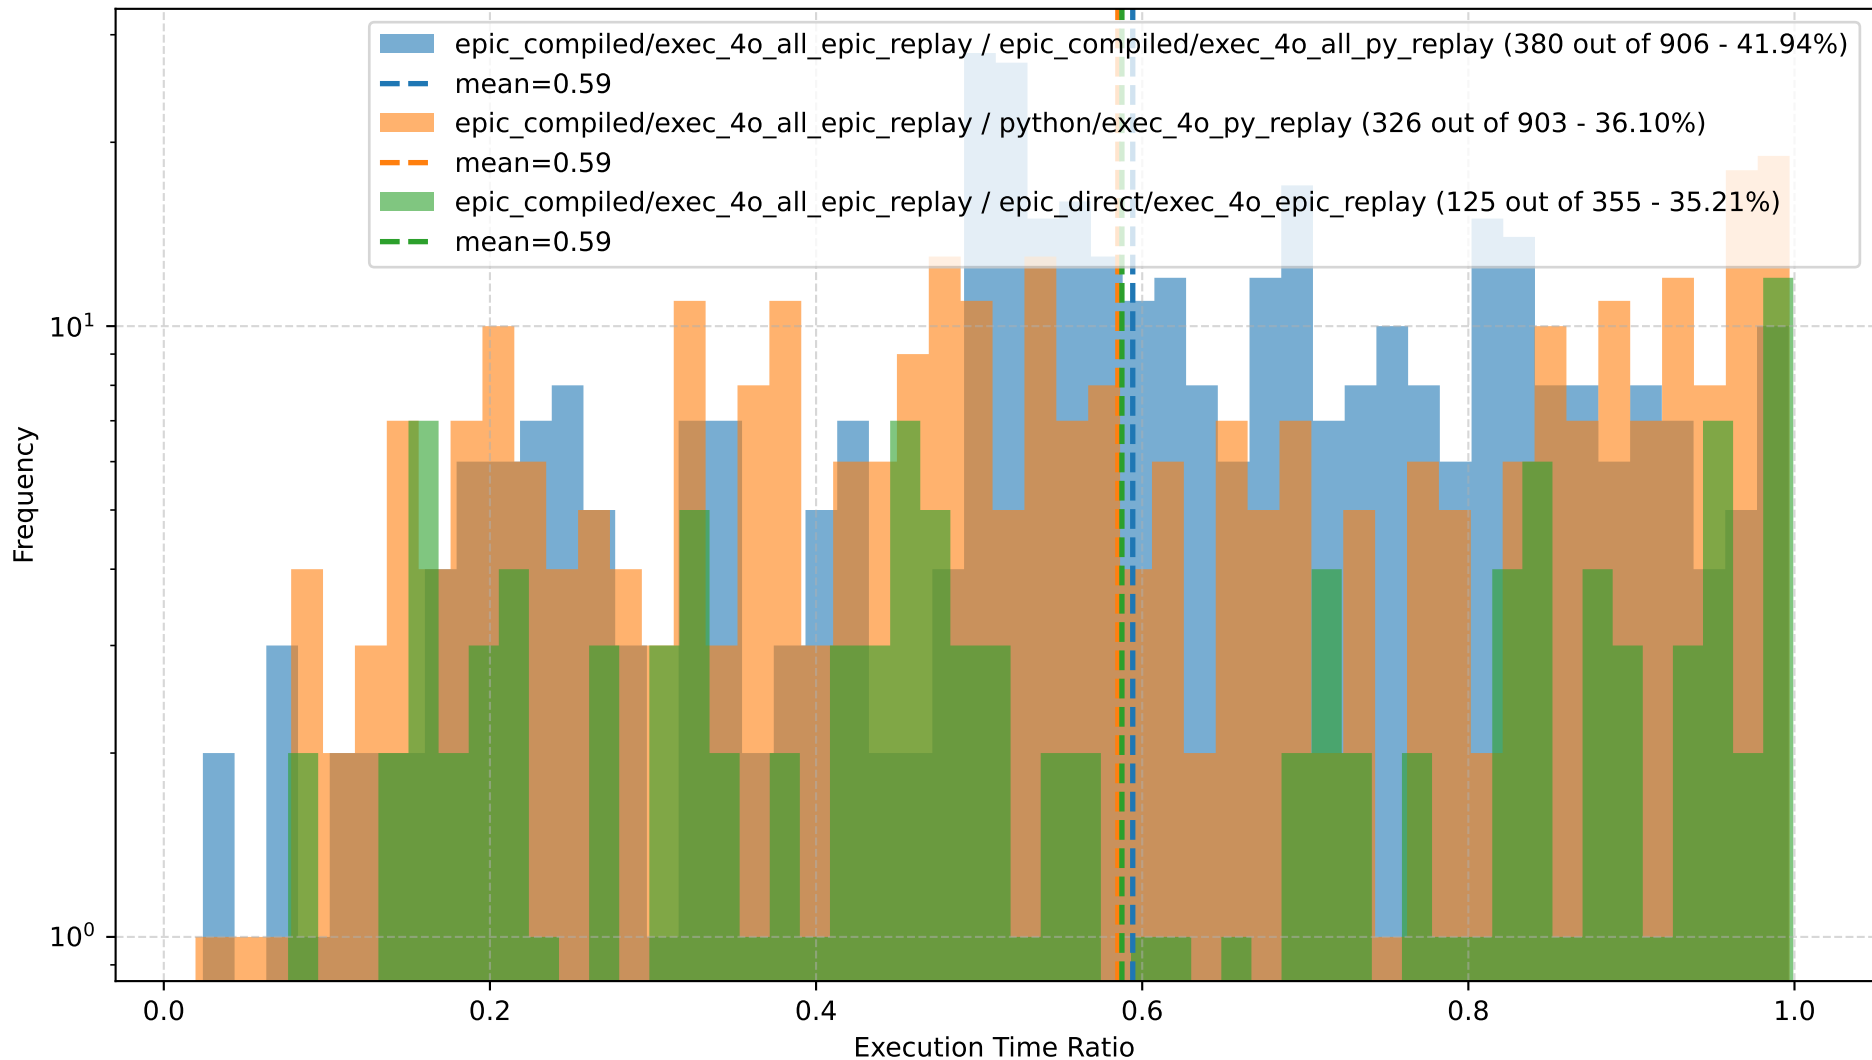

Supplement: supplementary_material [file ratio_histogram_log.pdf › quasar/datasets/gqa/plots/runtime/exec_4o_all_epic_replay/three_baselines/ratio_histogram_log.pdf]

Execution Time Comparison Boxplot

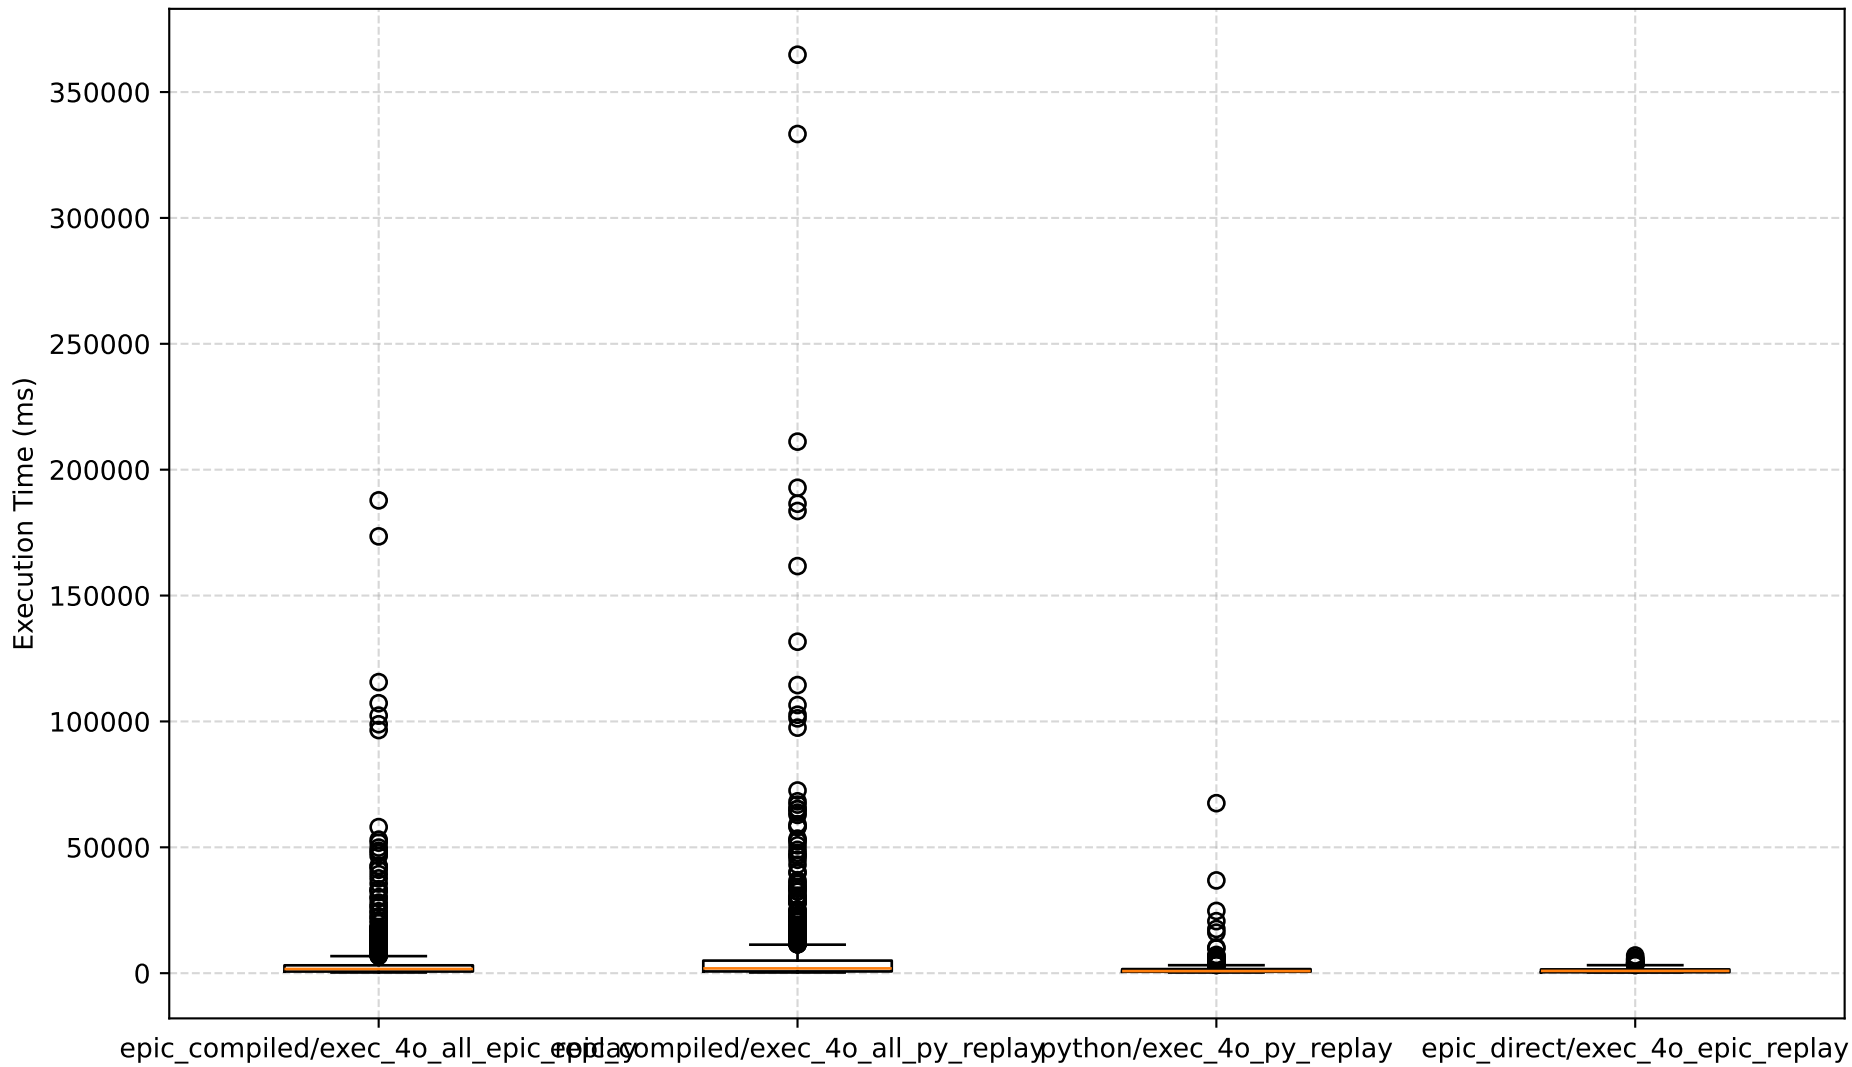

Supplement: supplementary_material [file runtime_boxplot.pdf › quasar/datasets/gqa/plots/runtime/exec_4o_all_epic_replay/three_baselines/runtime_boxplot.pdf]

Execution Time Comparison Density

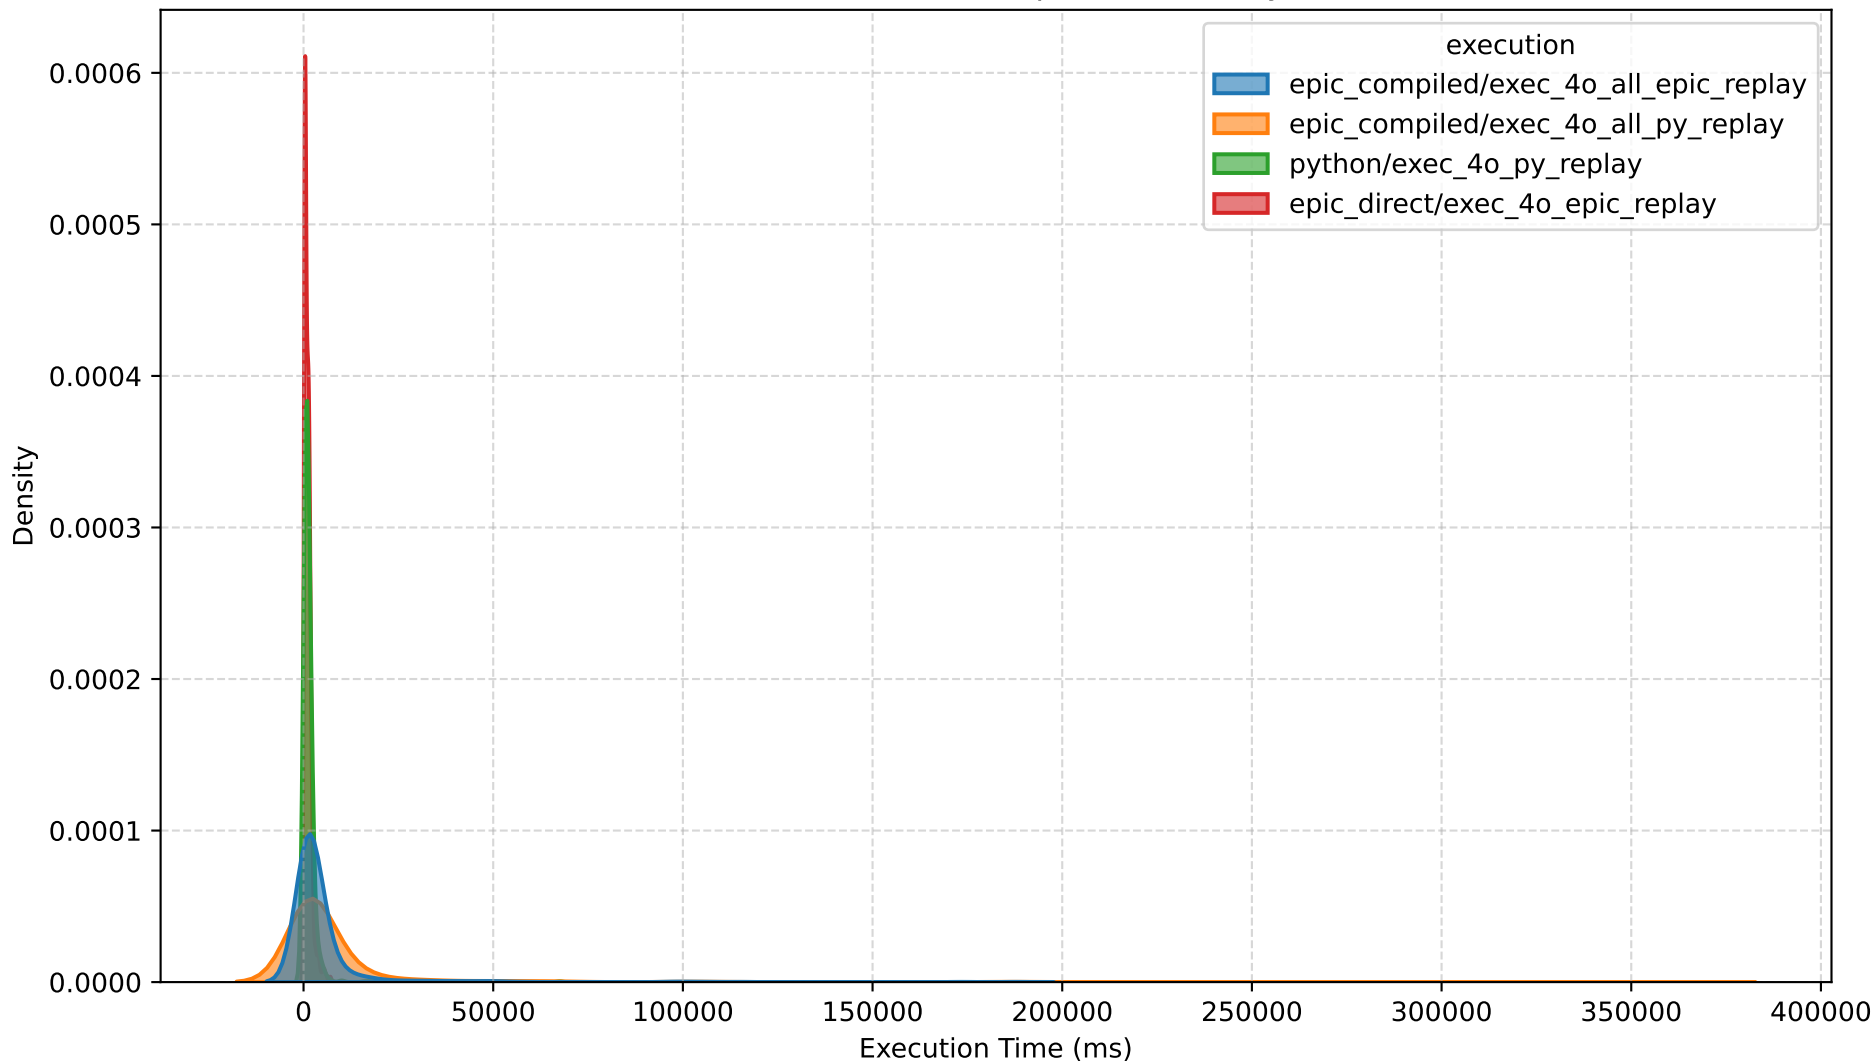

Supplement: supplementary_material [file runtime_density.pdf › quasar/datasets/gqa/plots/runtime/exec_4o_all_epic_replay/three_baselines/runtime_density.pdf]

Execution Time Comparison Histogram

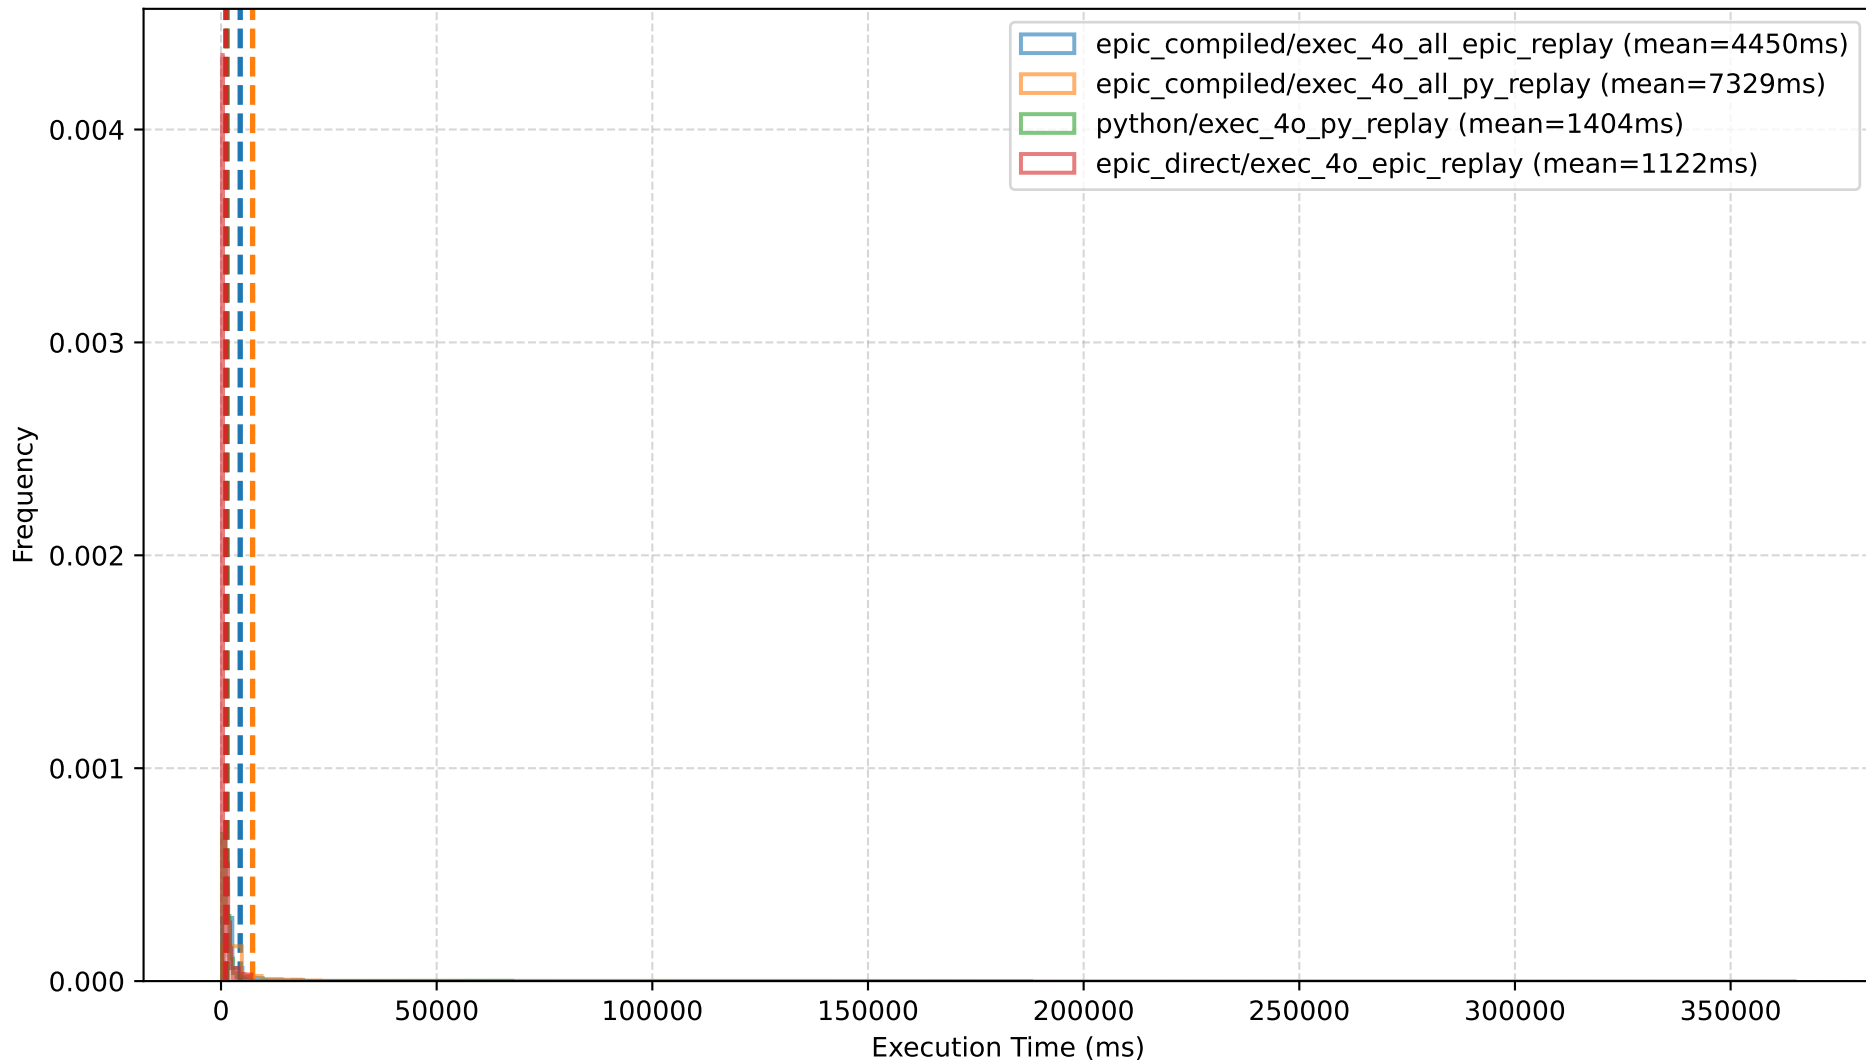

Supplement: supplementary_material [file runtime_histogram.pdf › quasar/datasets/gqa/plots/runtime/exec_4o_all_epic_replay/three_baselines/runtime_histogram.pdf]

# Execution Time Ratio

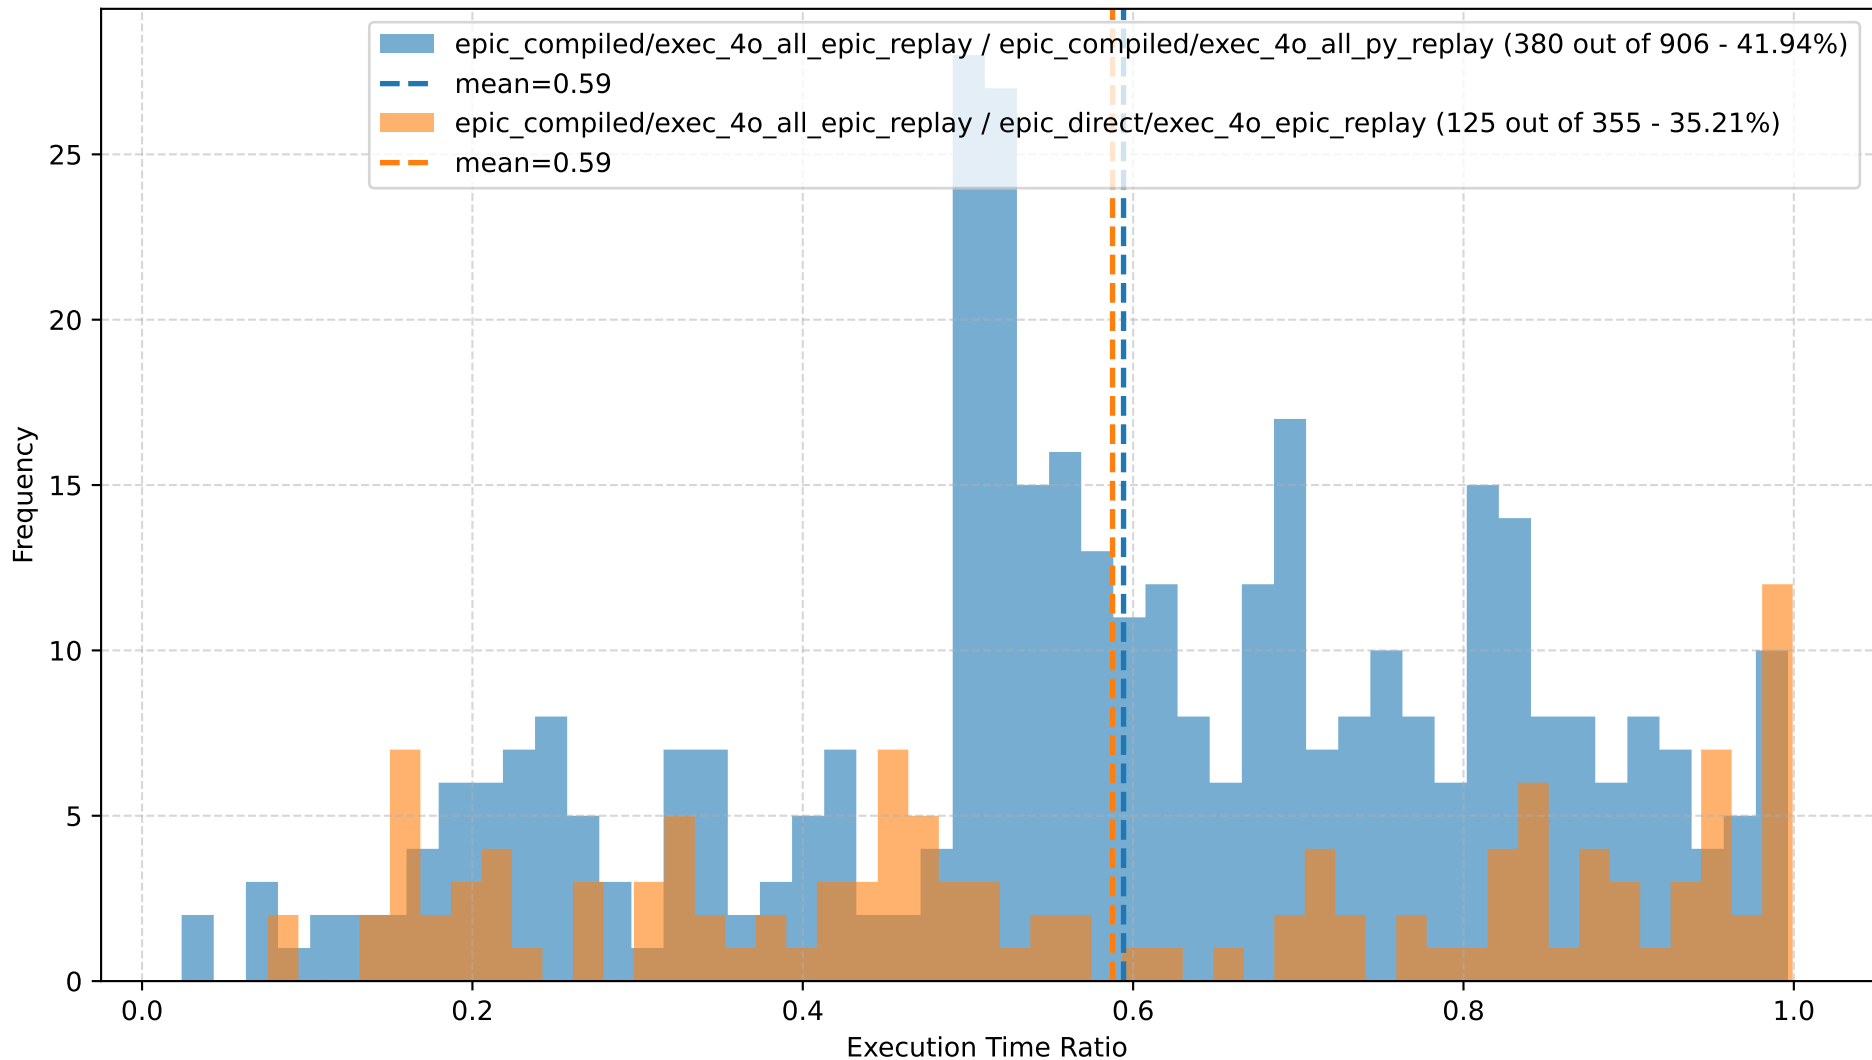

Supplement: supplementary_material [file ratio_histogram.pdf › quasar/datasets/gqa/plots/runtime/exec_4o_all_epic_replay/two_baselines/ratio_histogram.pdf]

# Execution Time Ratio (Log Scale)

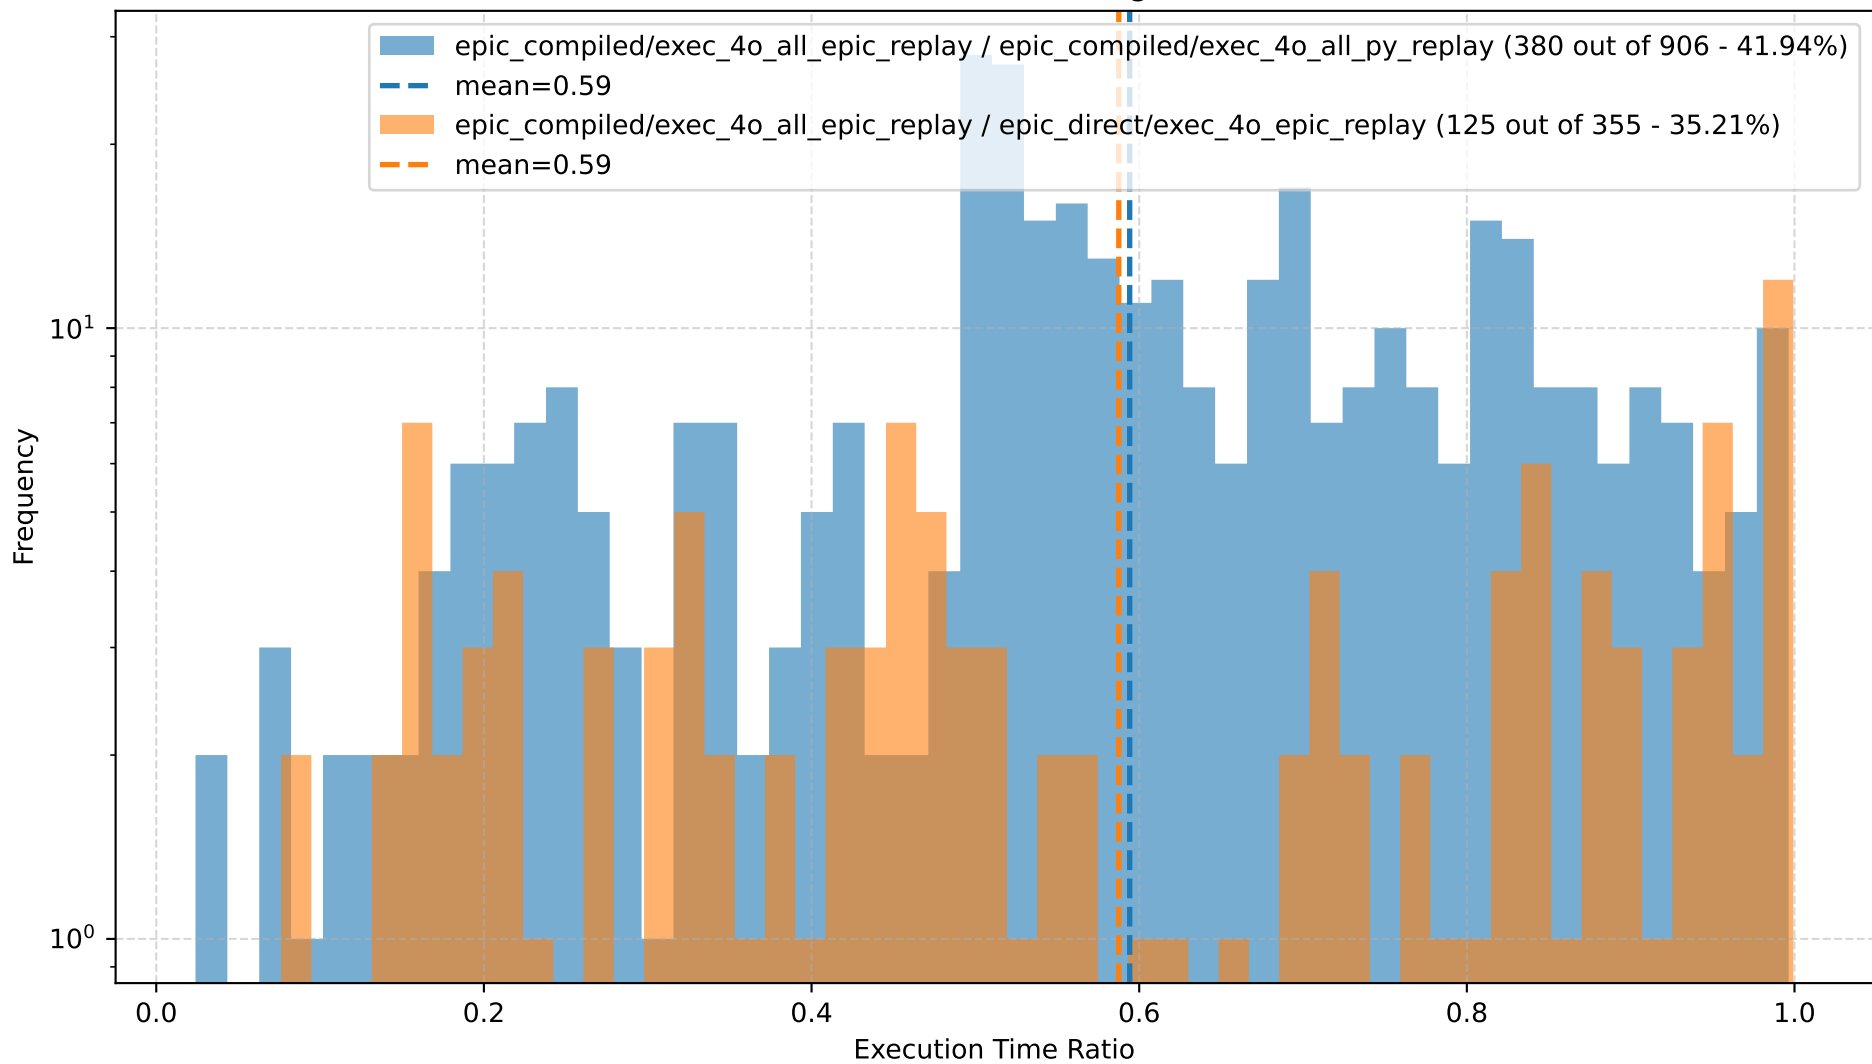

Supplement: supplementary_material [file ratio_histogram_log.pdf › quasar/datasets/gqa/plots/runtime/exec_4o_all_epic_replay/two_baselines/ratio_histogram_log.pdf]

Execution Time Comparison Boxplot

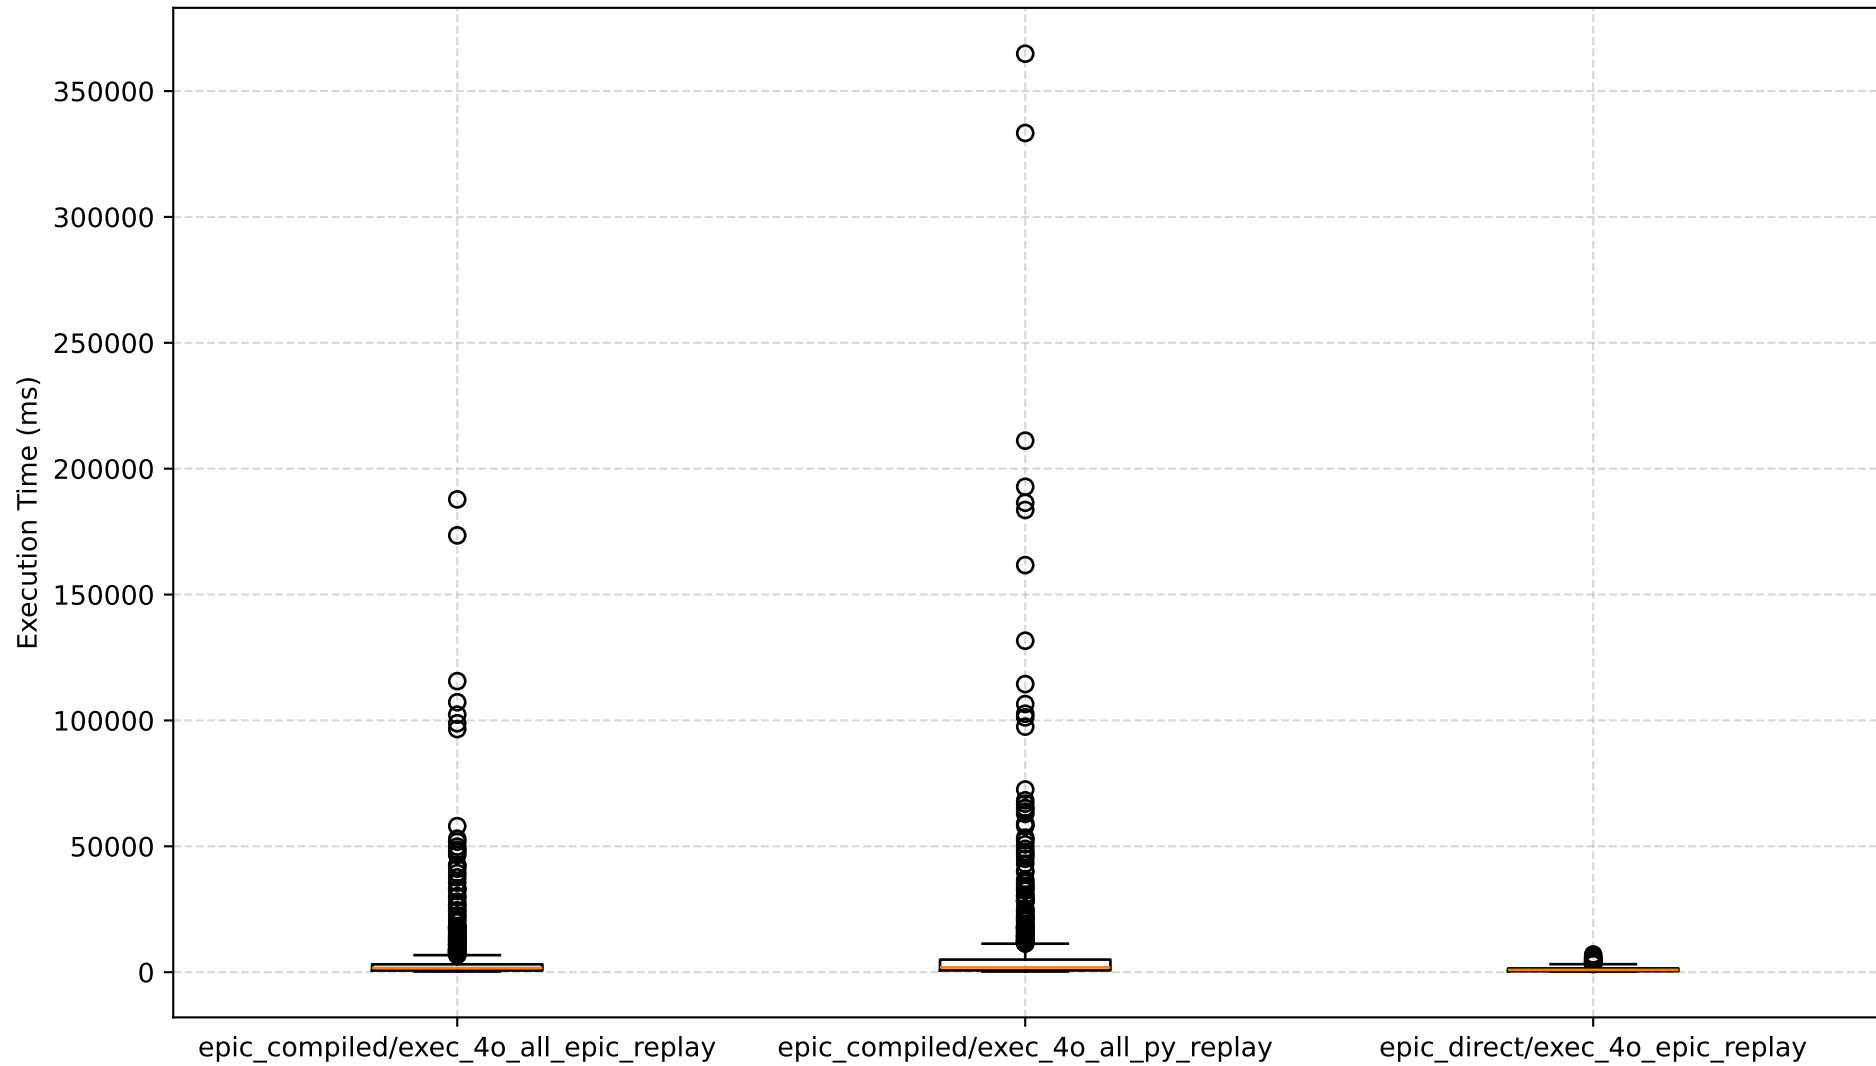

Supplement: supplementary_material [file runtime_boxplot.pdf › quasar/datasets/gqa/plots/runtime/exec_4o_all_epic_replay/two_baselines/runtime_boxplot.pdf]

Execution Time Comparison Density

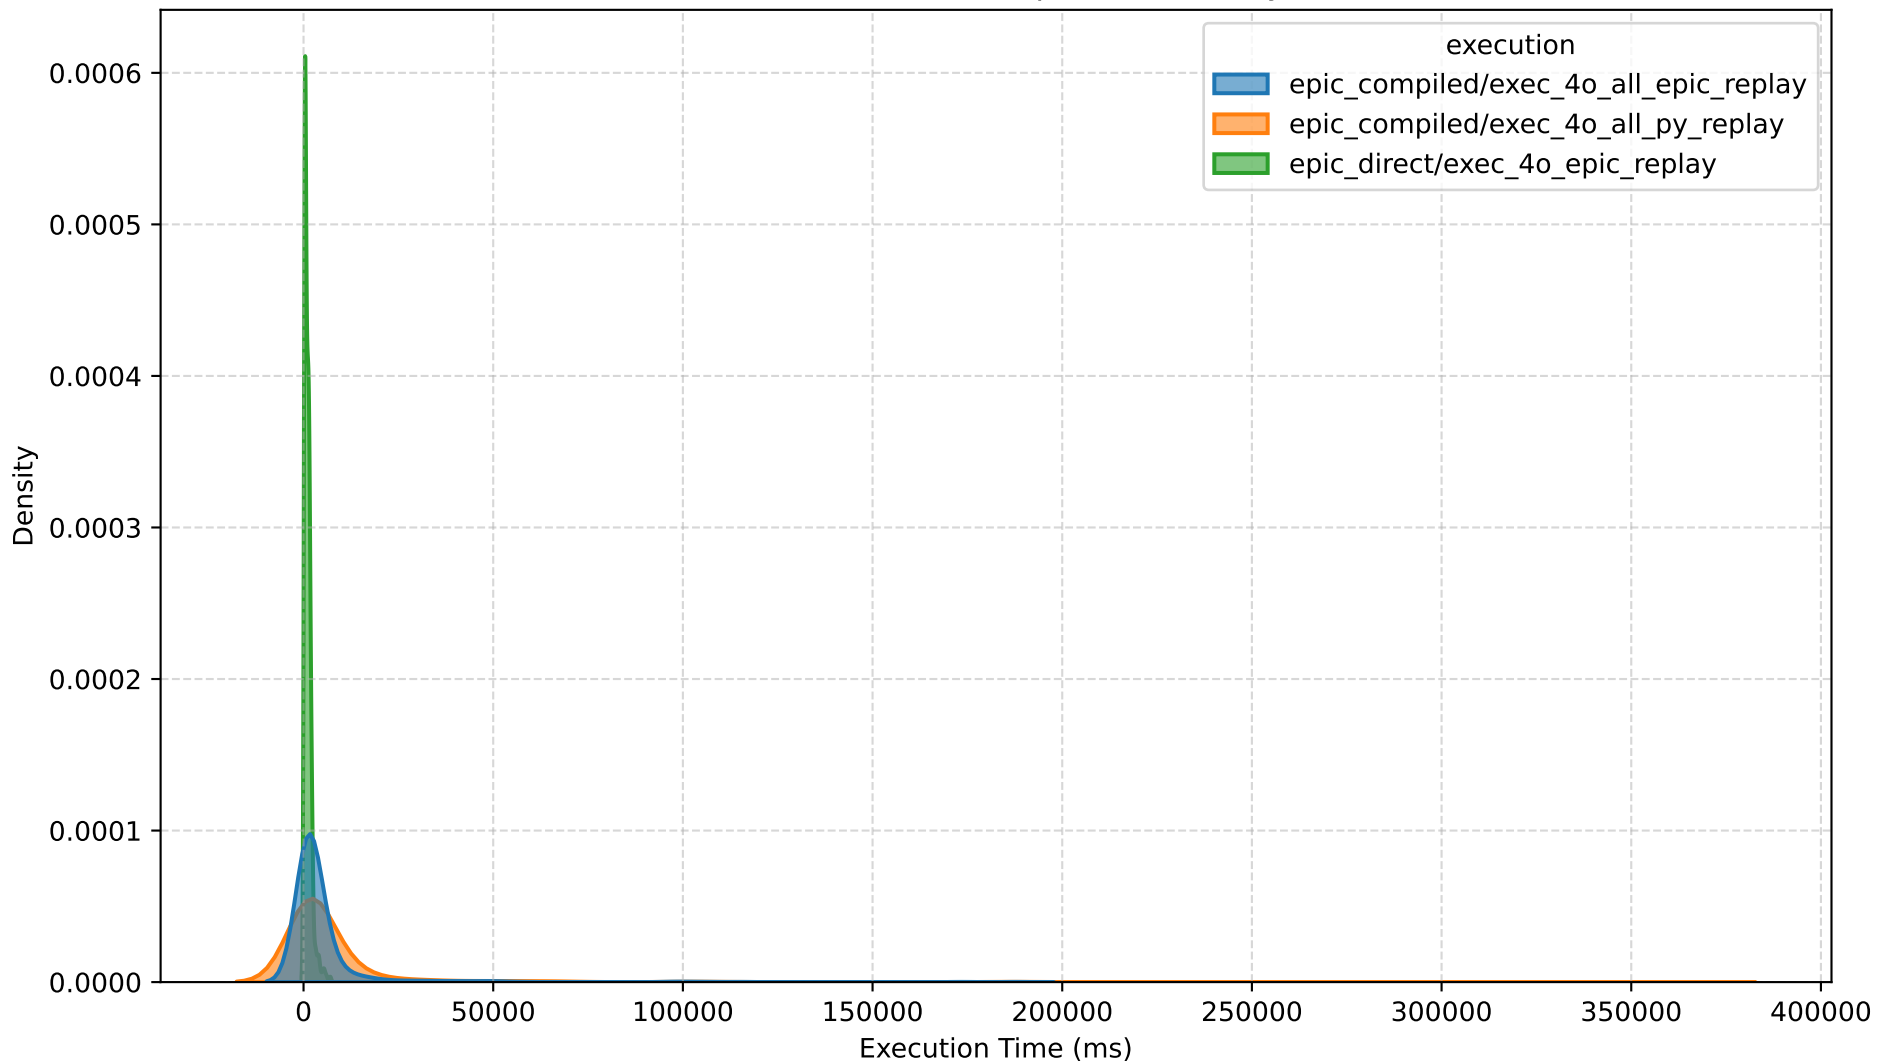

Supplement: supplementary_material [file runtime_density.pdf › quasar/datasets/gqa/plots/runtime/exec_4o_all_epic_replay/two_baselines/runtime_density.pdf]

Execution Time Comparison Histogram

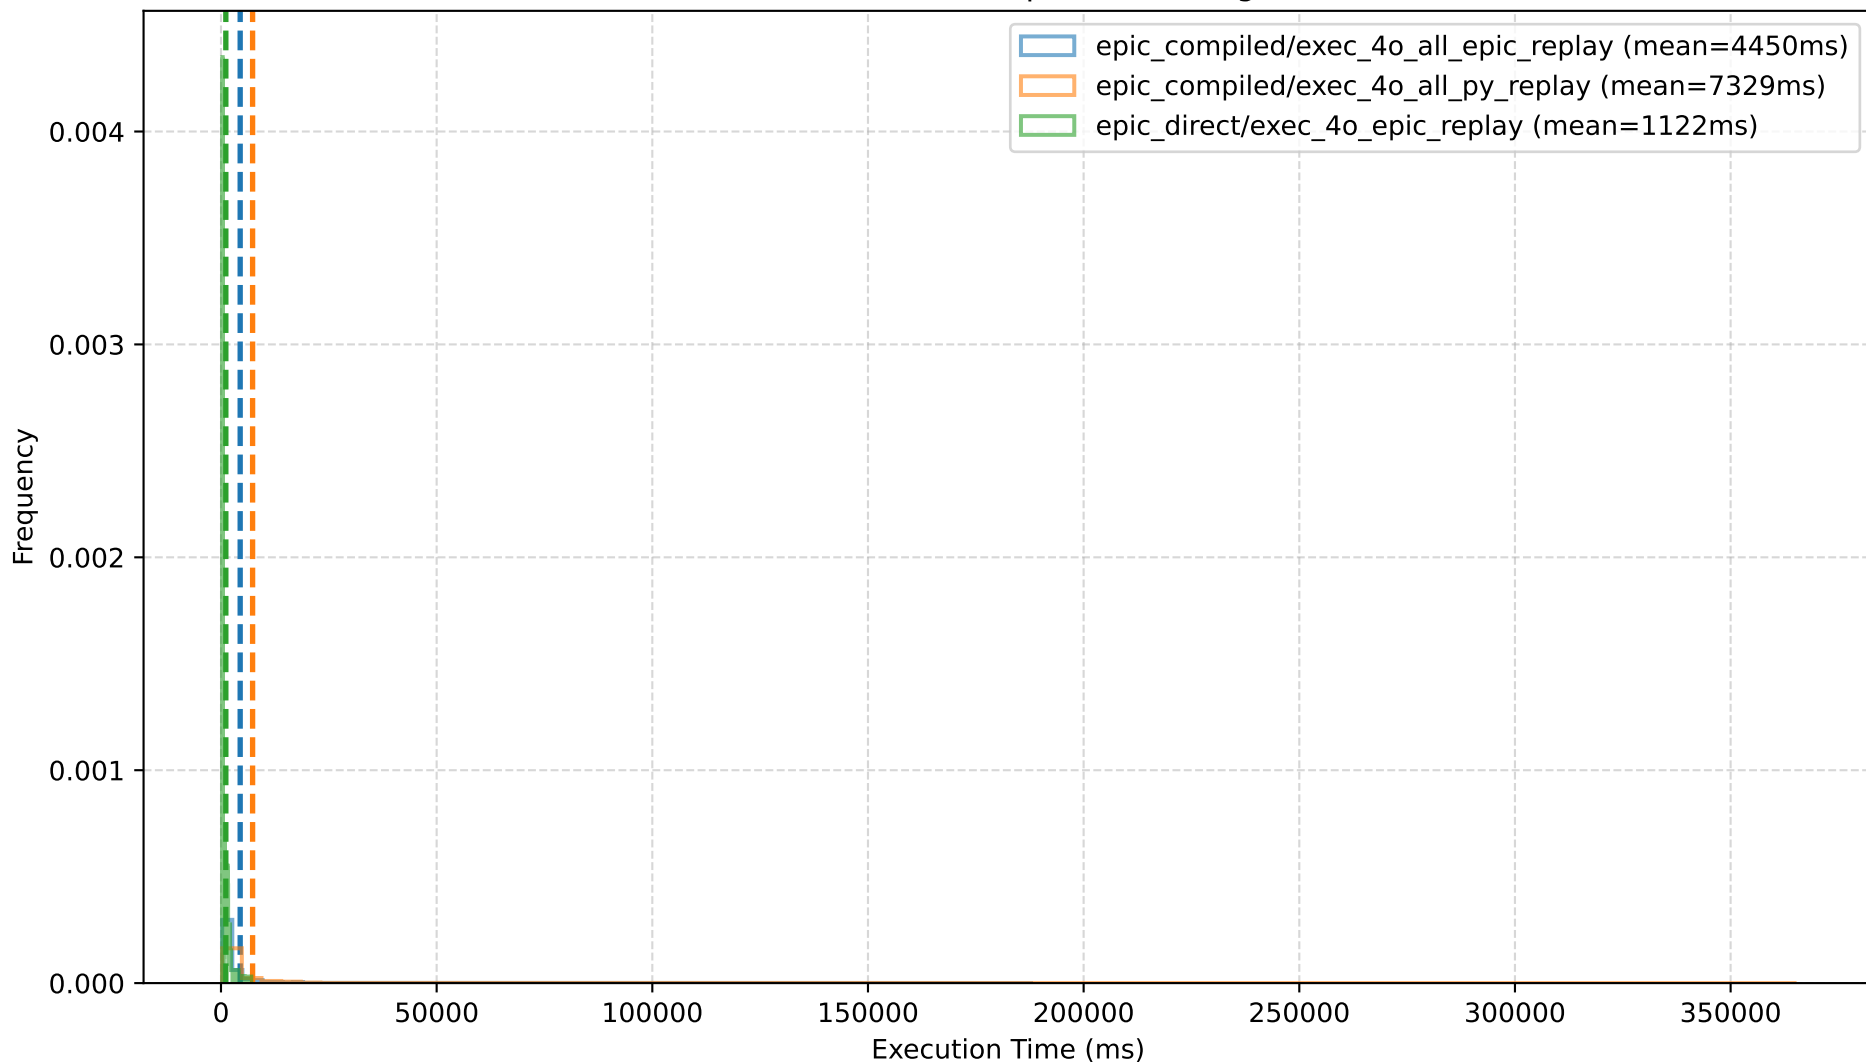

Supplement: supplementary_material [file runtime_histogram.pdf › quasar/datasets/gqa/plots/runtime/exec_4o_all_epic_replay/two_baselines/runtime_histogram.pdf]

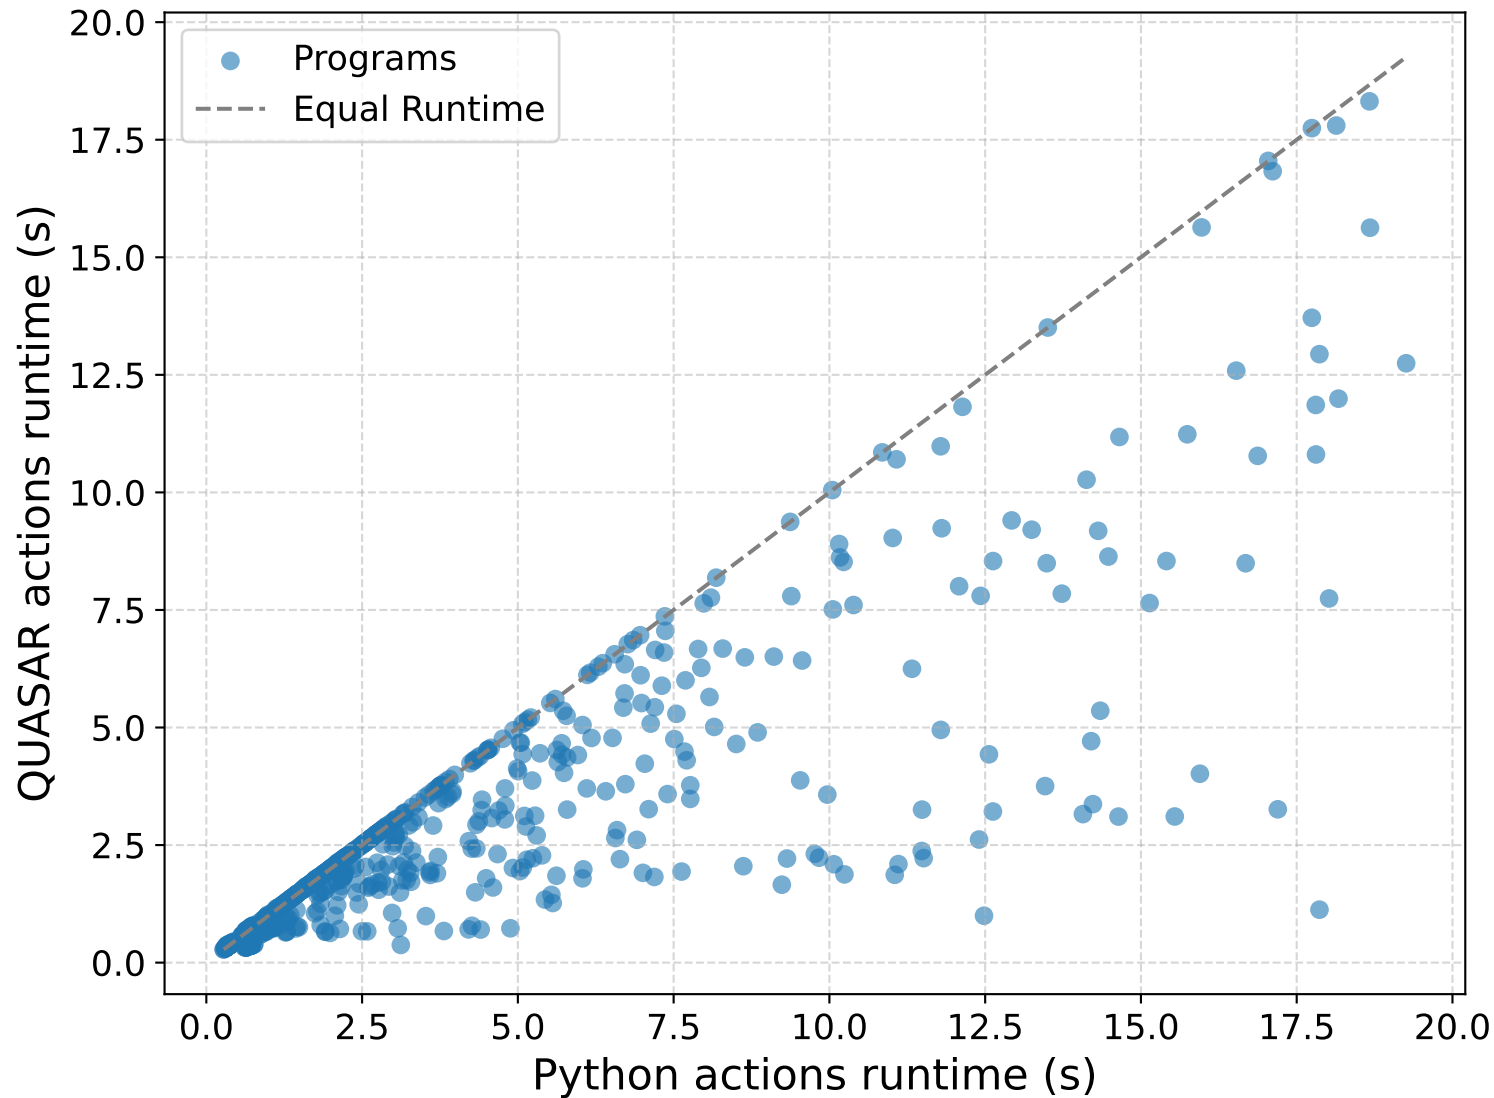

Supplement: supplementary_material [file runtime_scatter.pdf › quasar/datasets/gqa/plots/runtime/exec_4o_all_epic_replay/two_baselines/runtime_scatter.pdf]

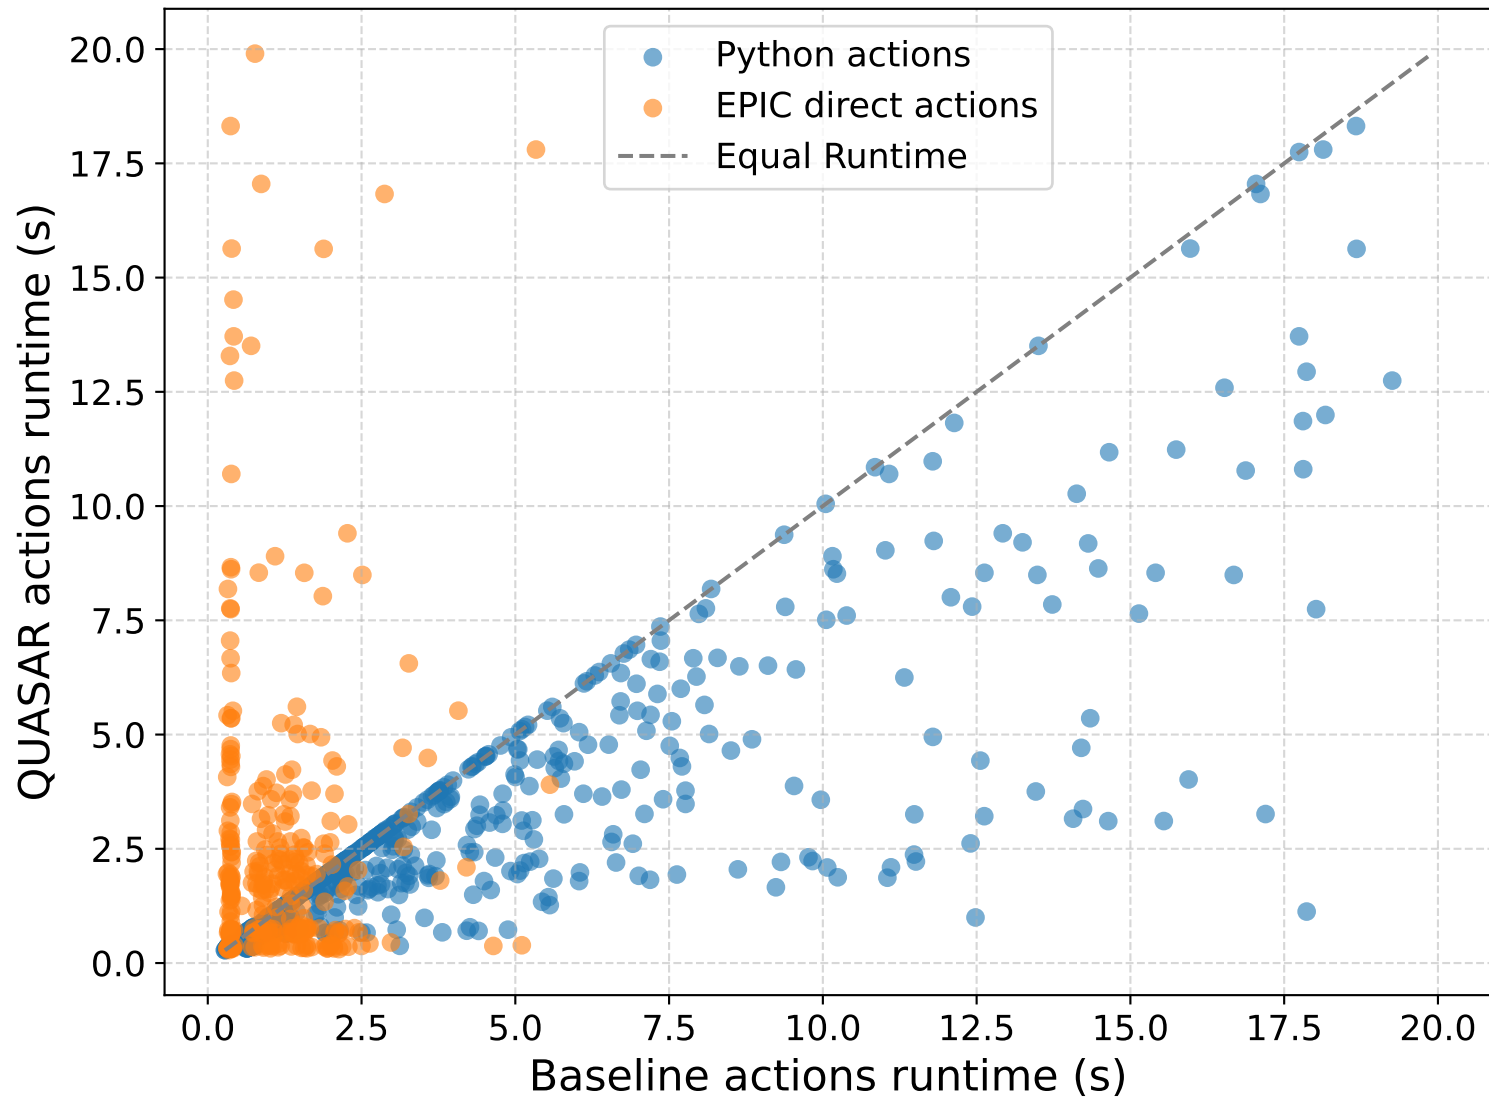

Supplement: supplementary_material [file runtime_scatter_all.pdf › quasar/datasets/gqa/plots/runtime/exec_4o_all_epic_replay/two_baselines/runtime_scatter_all.pdf]

Execution Time Ratio

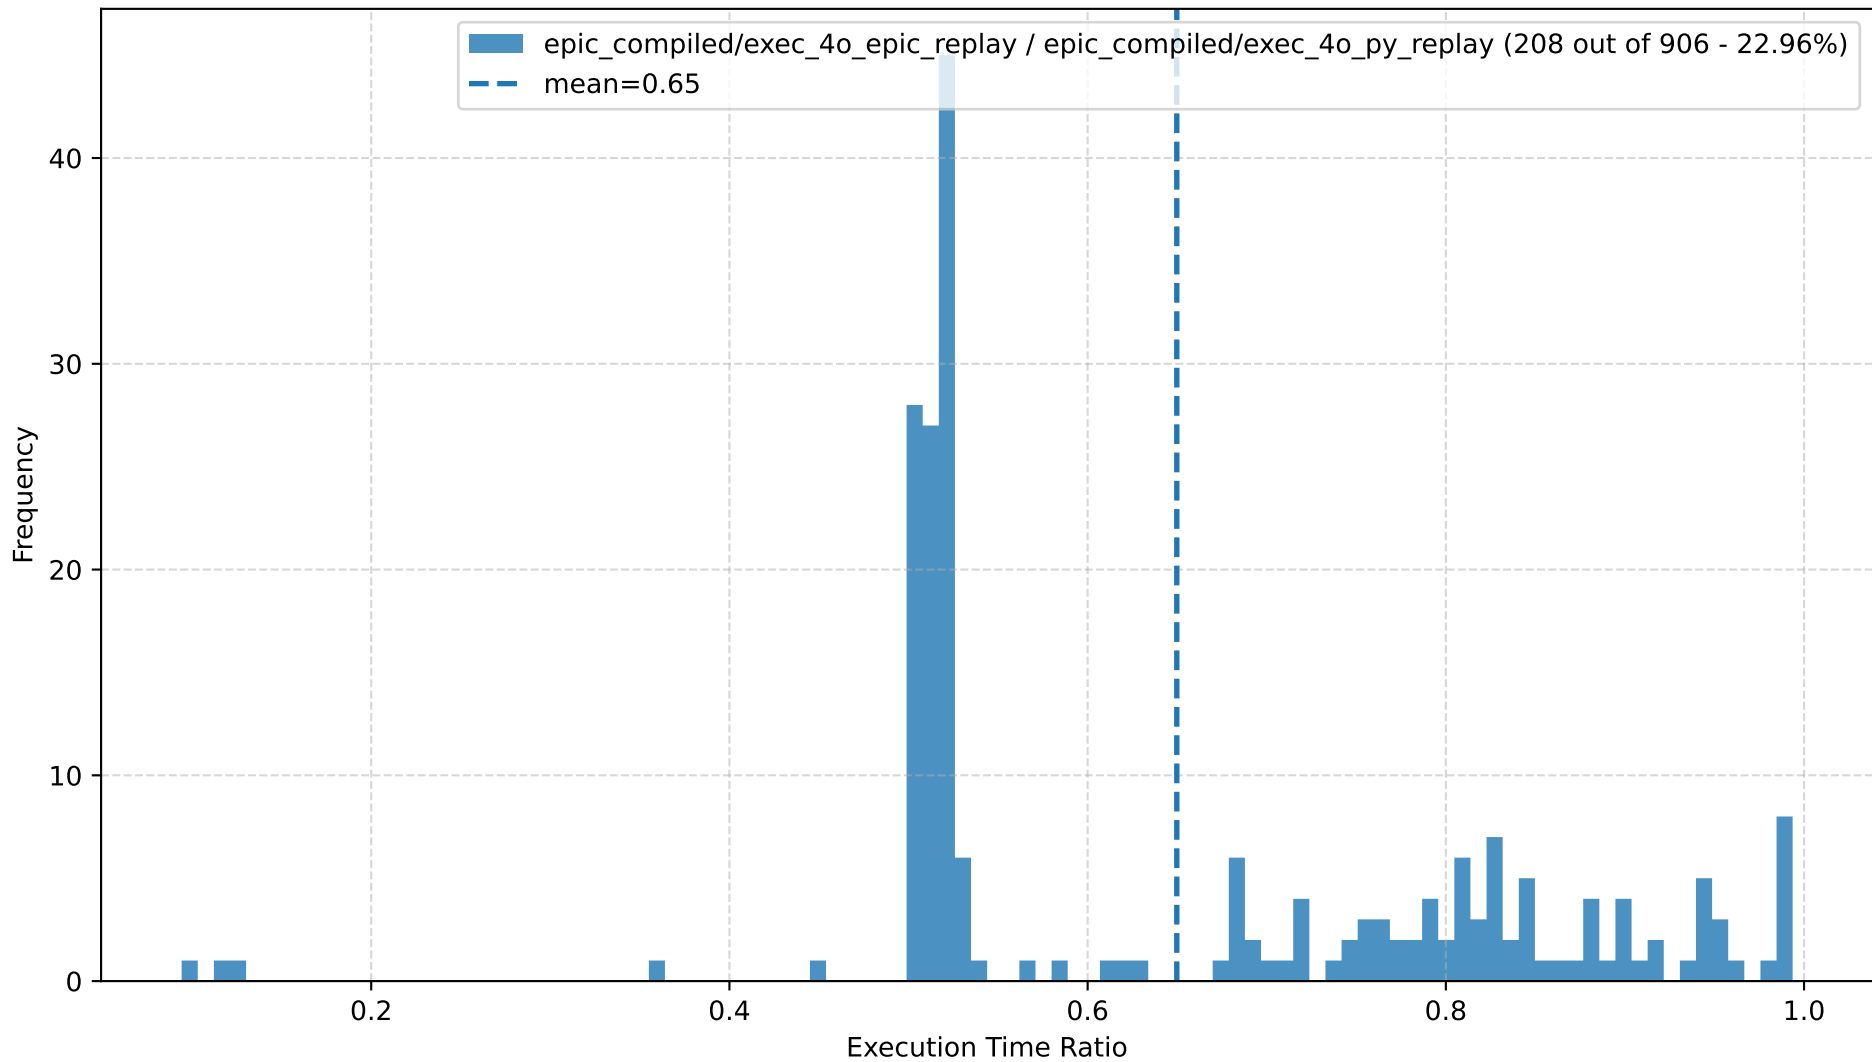

Supplement: supplementary_material [file ratio_histogram.pdf › quasar/datasets/gqa/plots/runtime/exec_4o_epic_replay/baseline_epic_compiled_exec_4o_py_replay/ratio_histogram.pdf]

Execution Time Ratio (Log Scale)

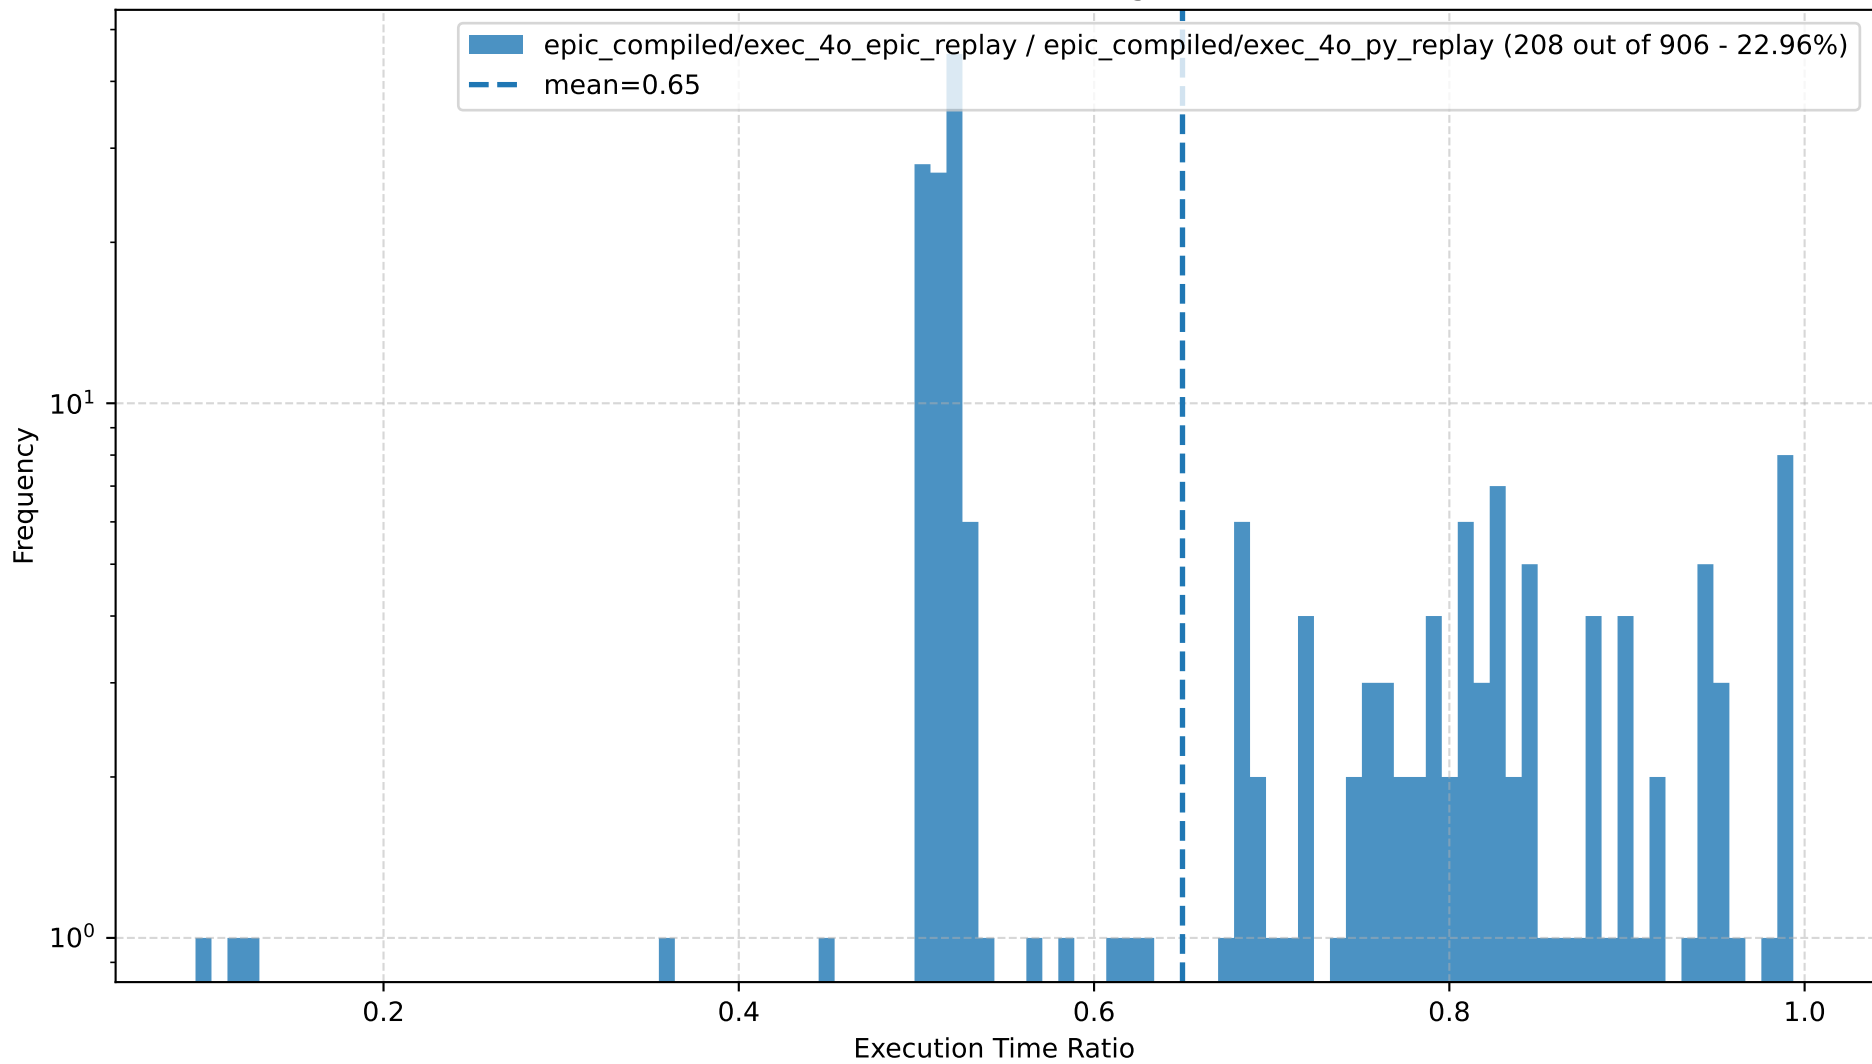

Supplement: supplementary_material [file ratio_histogram_log.pdf › quasar/datasets/gqa/plots/runtime/exec_4o_epic_replay/baseline_epic_compiled_exec_4o_py_replay/ratio_histogram_log.pdf]

Execution Time Comparison (Box Plot)

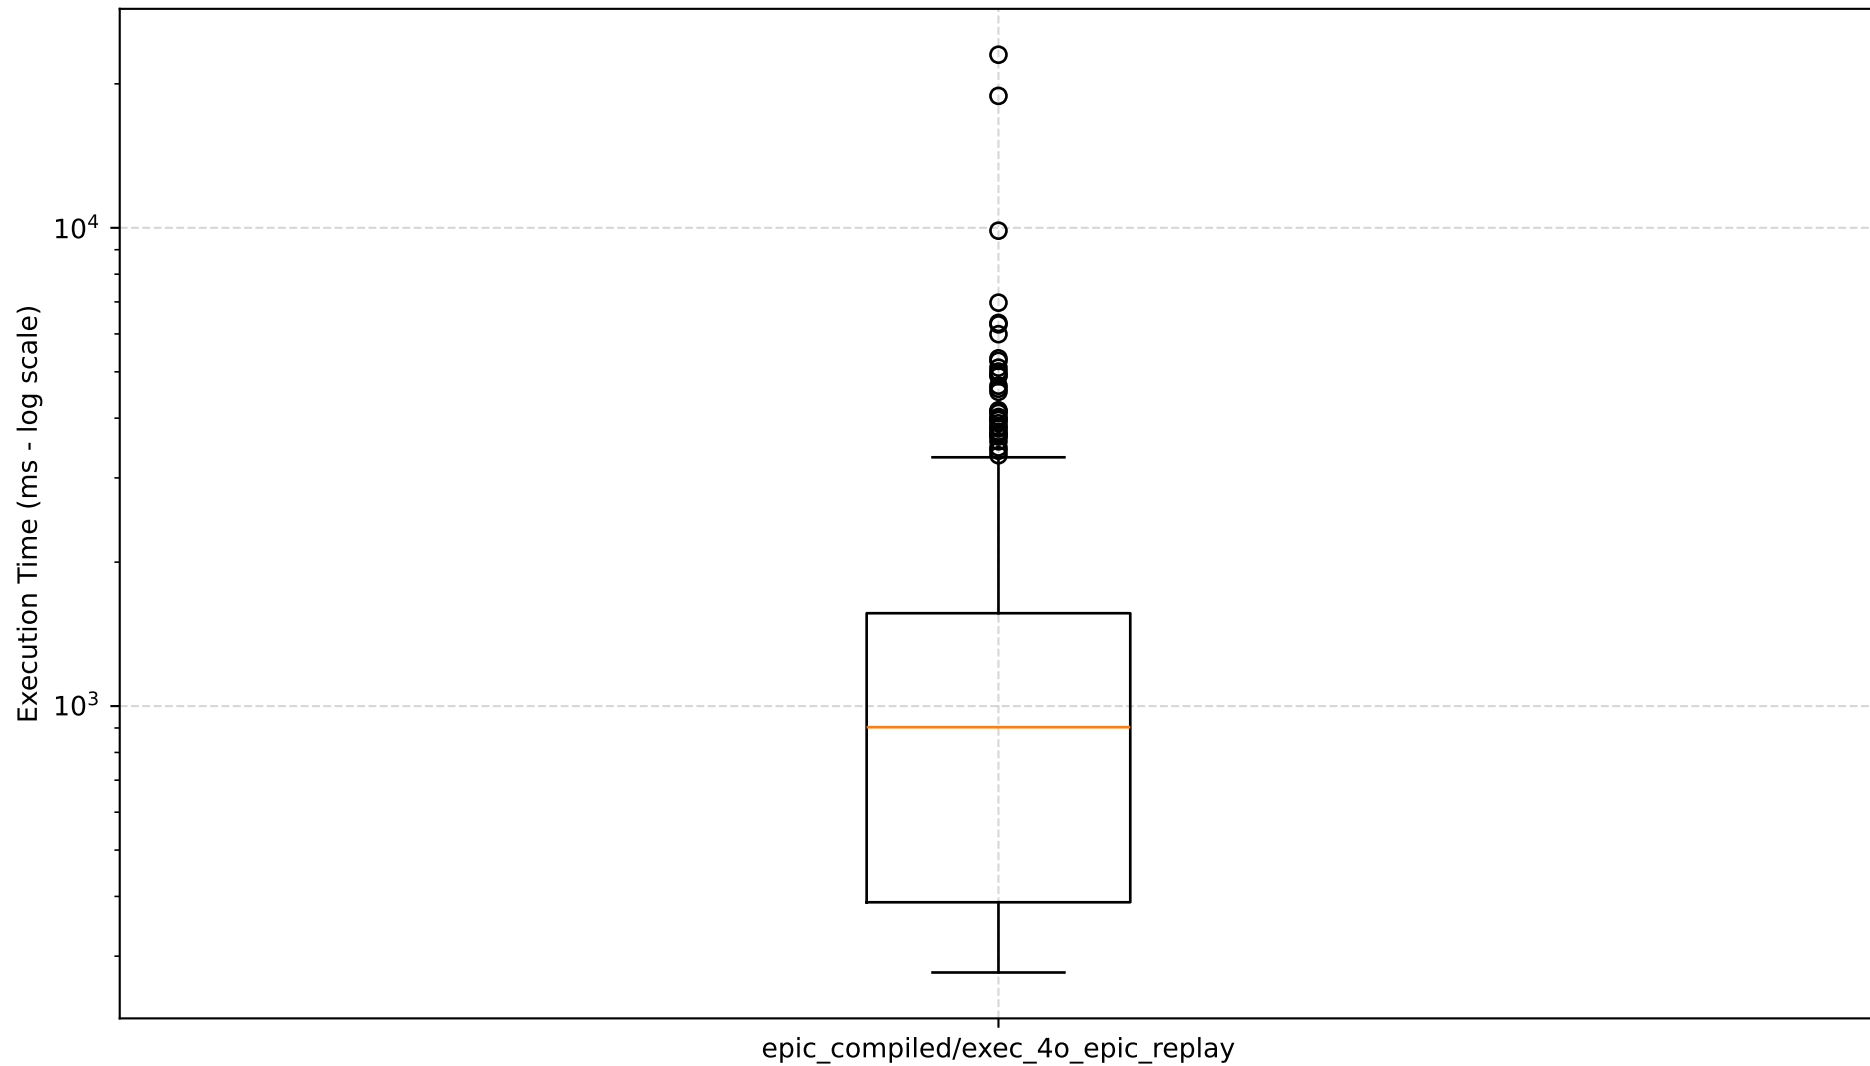

Supplement: supplementary_material [file runtime_boxplot.pdf › quasar/datasets/gqa/plots/runtime/exec_4o_epic_replay/baseline_epic_compiled_exec_4o_py_replay/runtime_boxplot.pdf]

Execution Time Comparison (Density Plot)

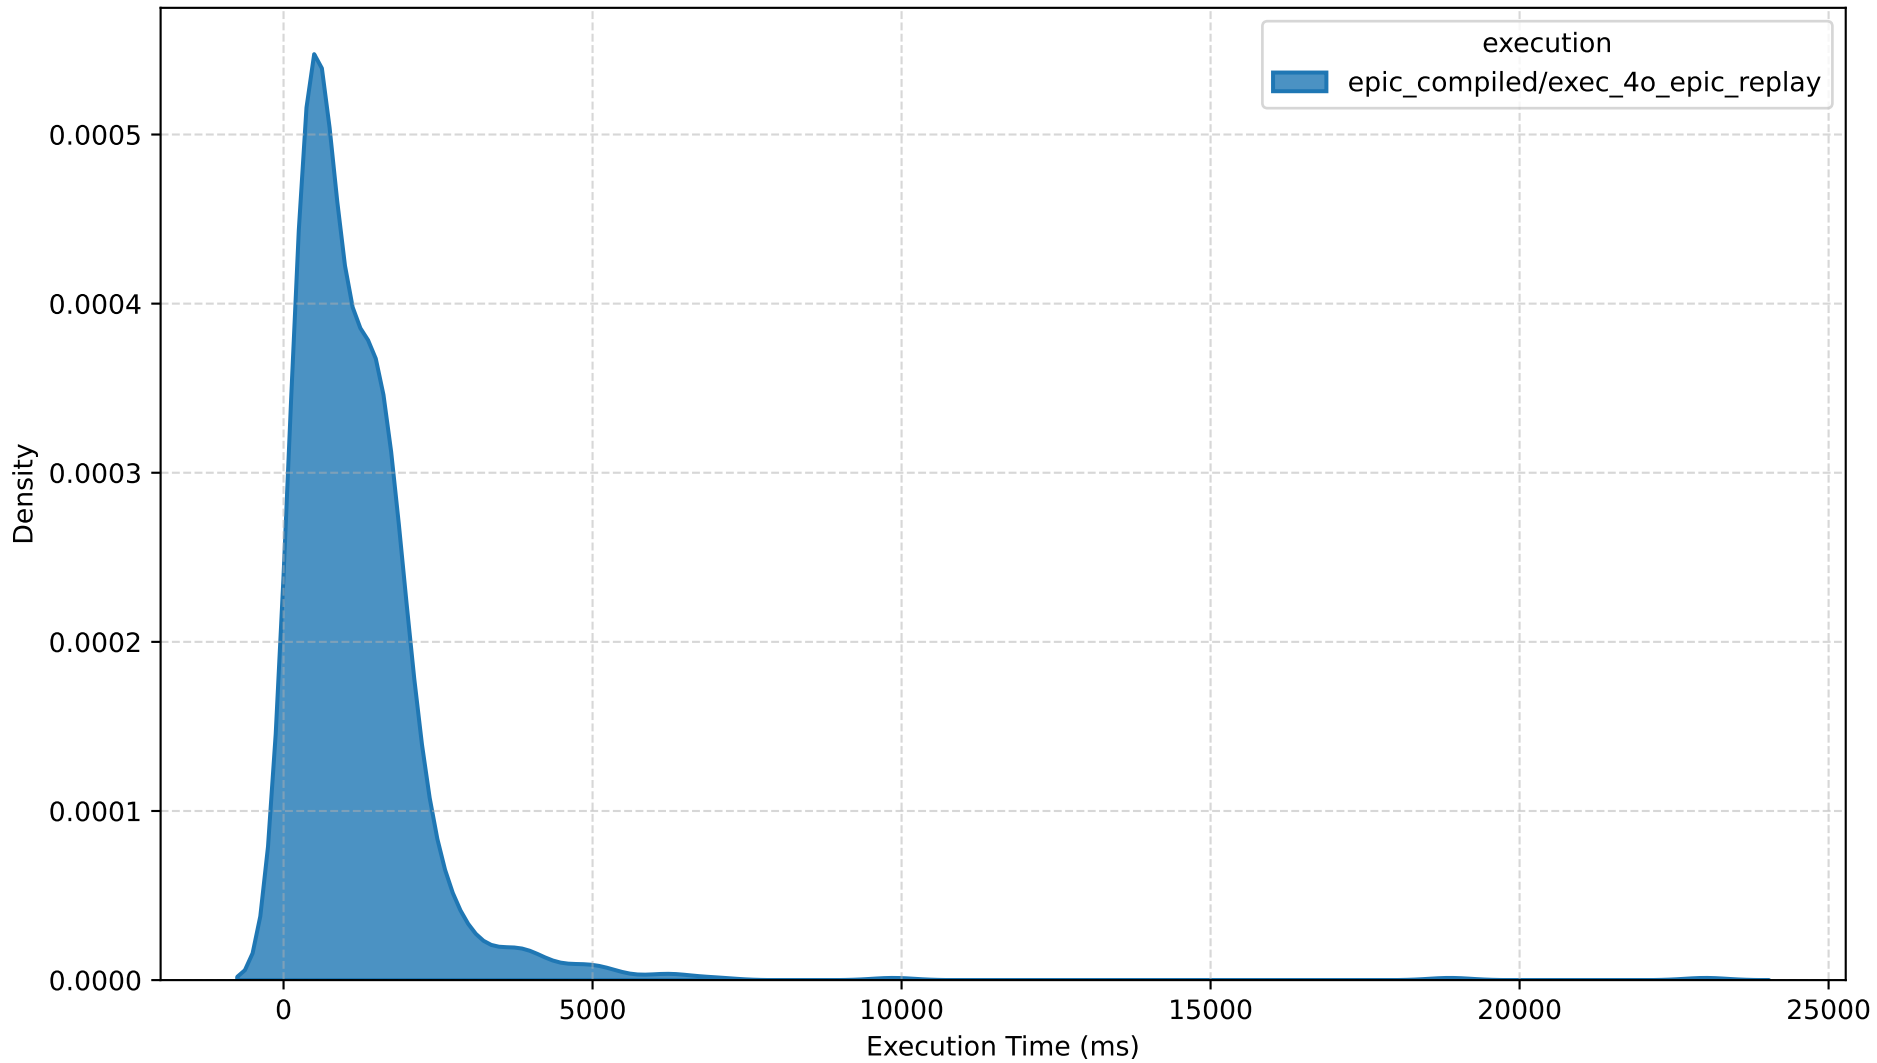

Supplement: supplementary_material [file runtime_density.pdf › quasar/datasets/gqa/plots/runtime/exec_4o_epic_replay/baseline_epic_compiled_exec_4o_py_replay/runtime_density.pdf]

Execution Time Comparison (Histogram)

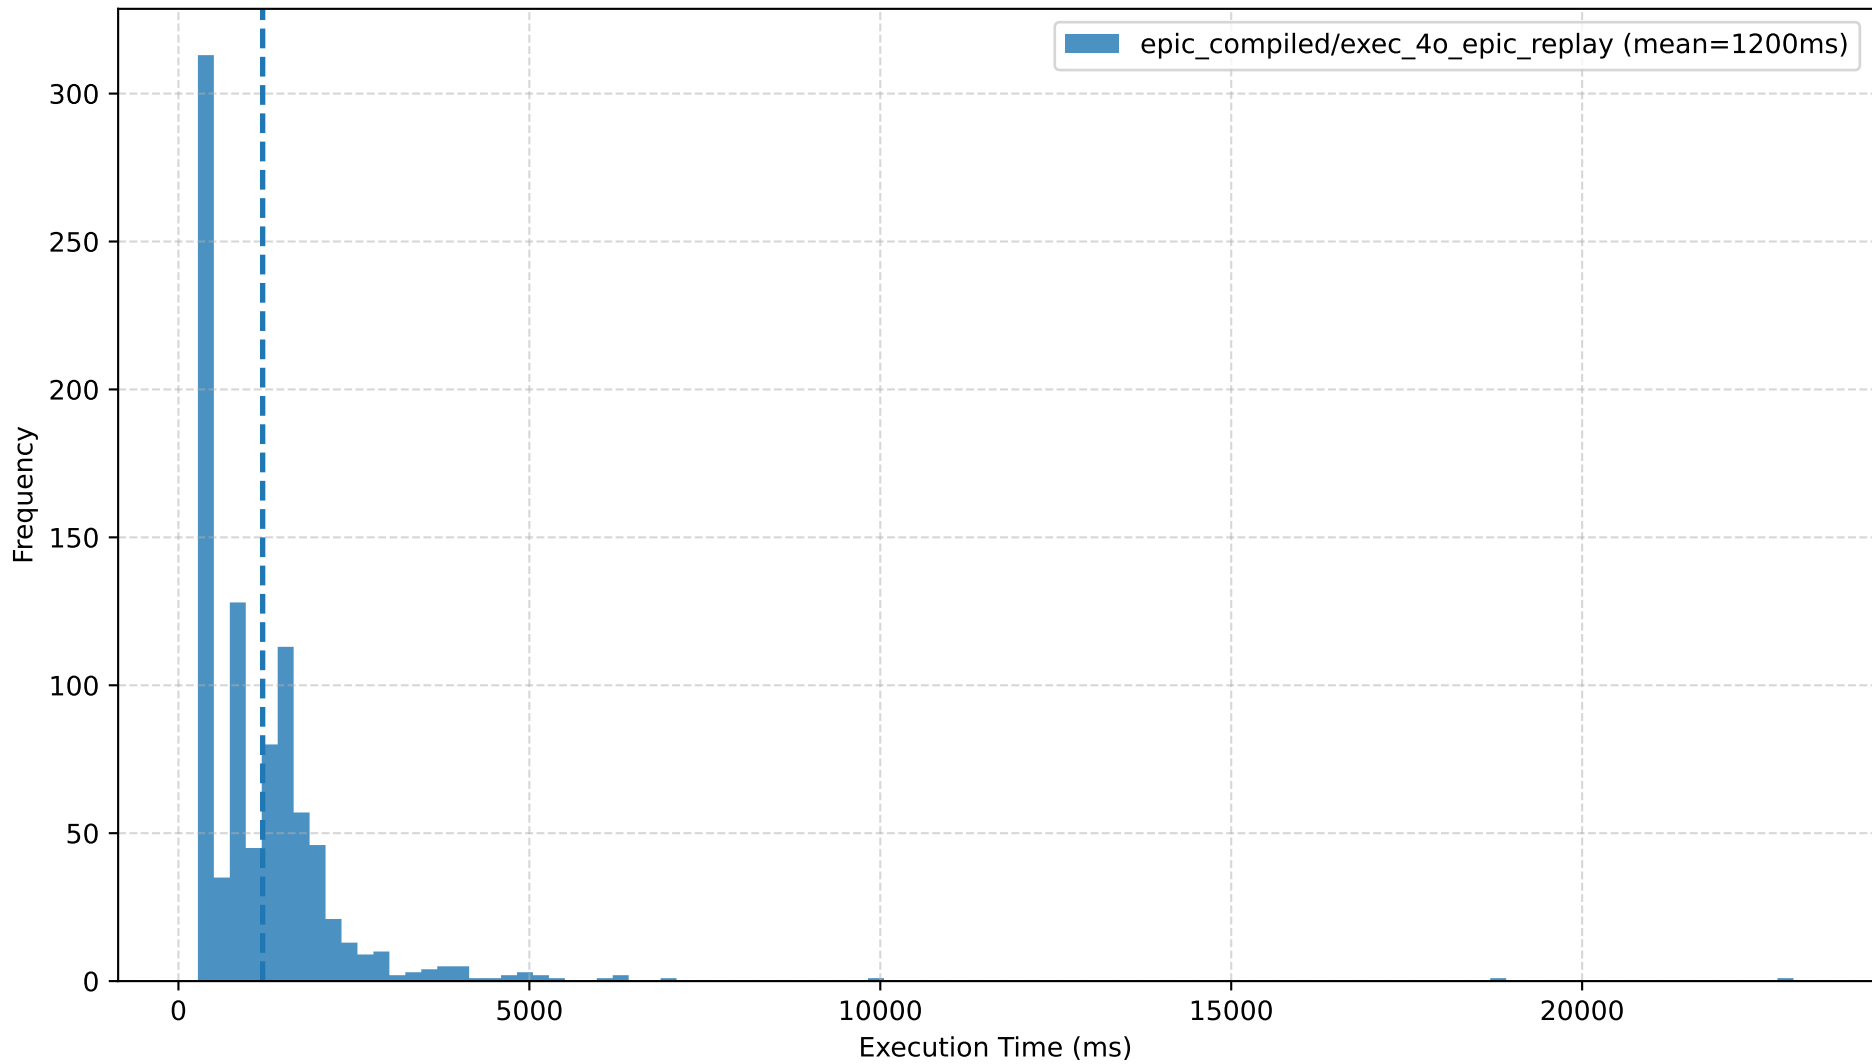

Supplement: supplementary_material [file runtime_histogram.pdf › quasar/datasets/gqa/plots/runtime/exec_4o_epic_replay/baseline_epic_compiled_exec_4o_py_replay/runtime_histogram.pdf]

Execution Time Ratio

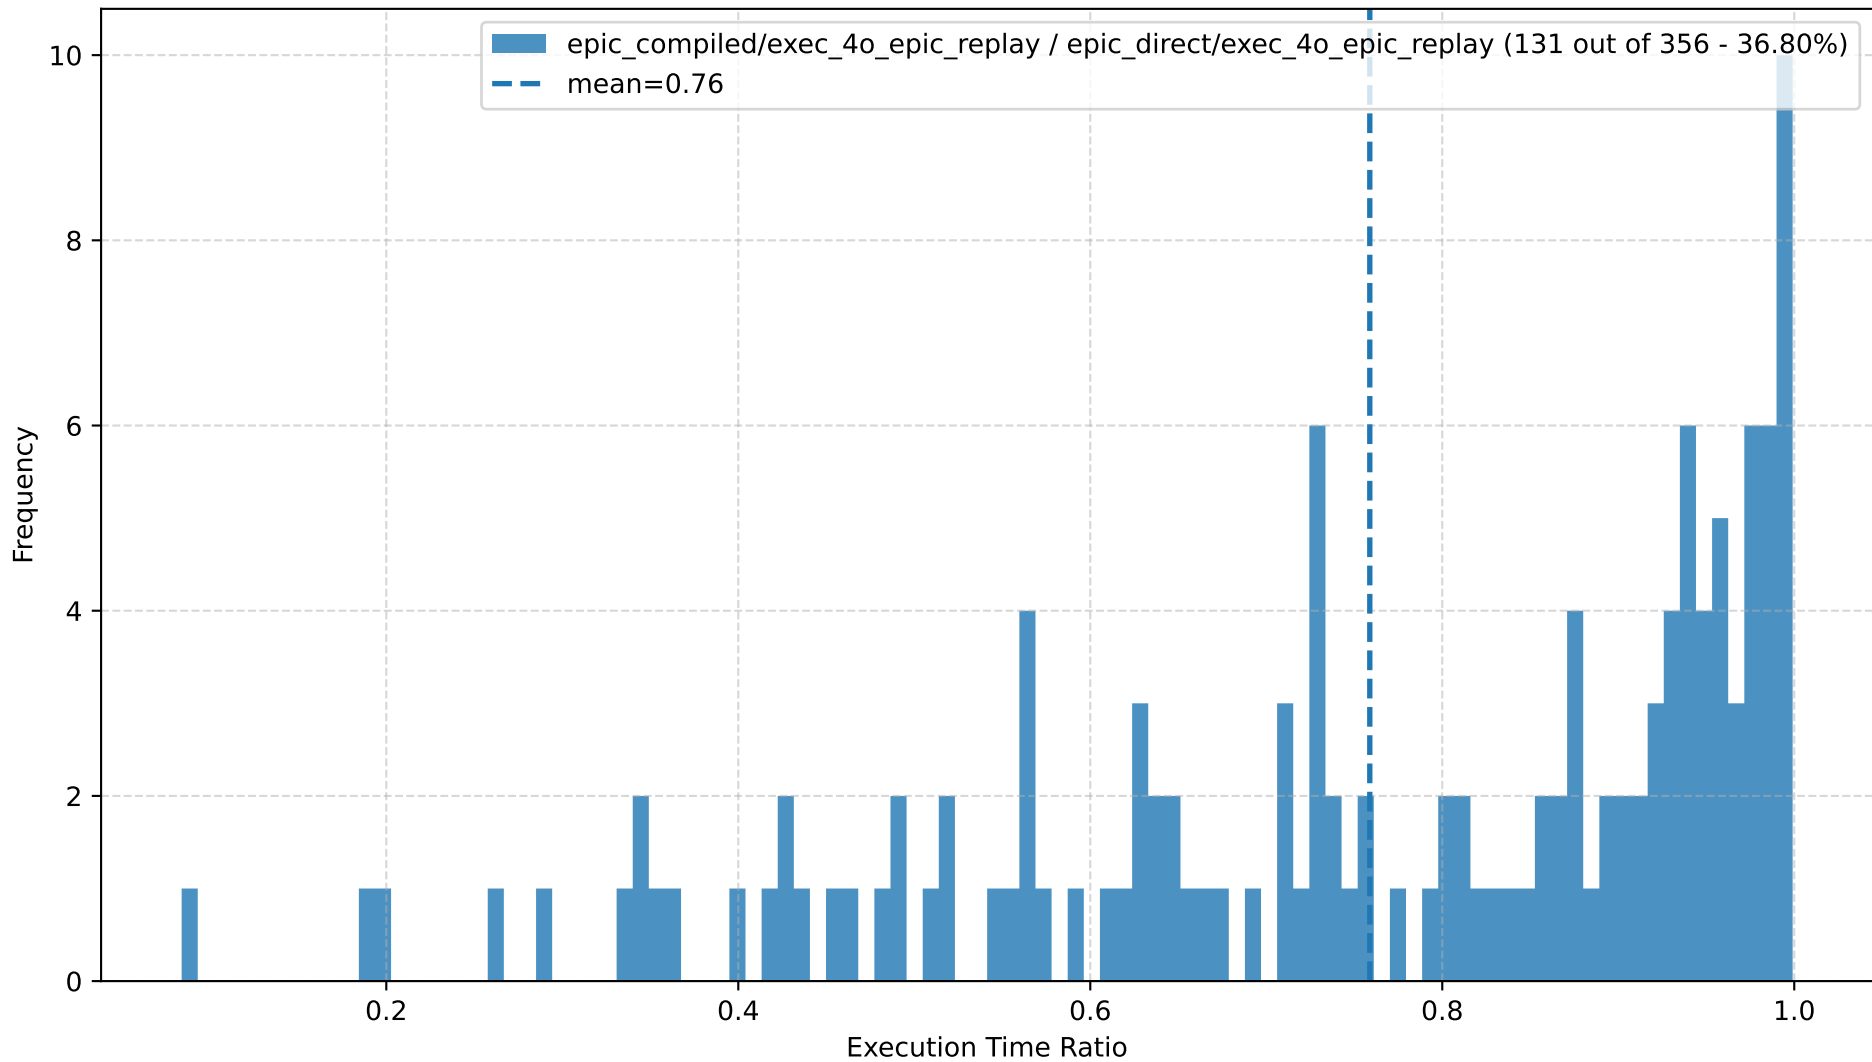

Supplement: supplementary_material [file ratio_histogram.pdf › quasar/datasets/gqa/plots/runtime/exec_4o_epic_replay/baseline_epic_direct_exec_4o_epic_replay/ratio_histogram.pdf]

Execution Time Ratio (Log Scale)

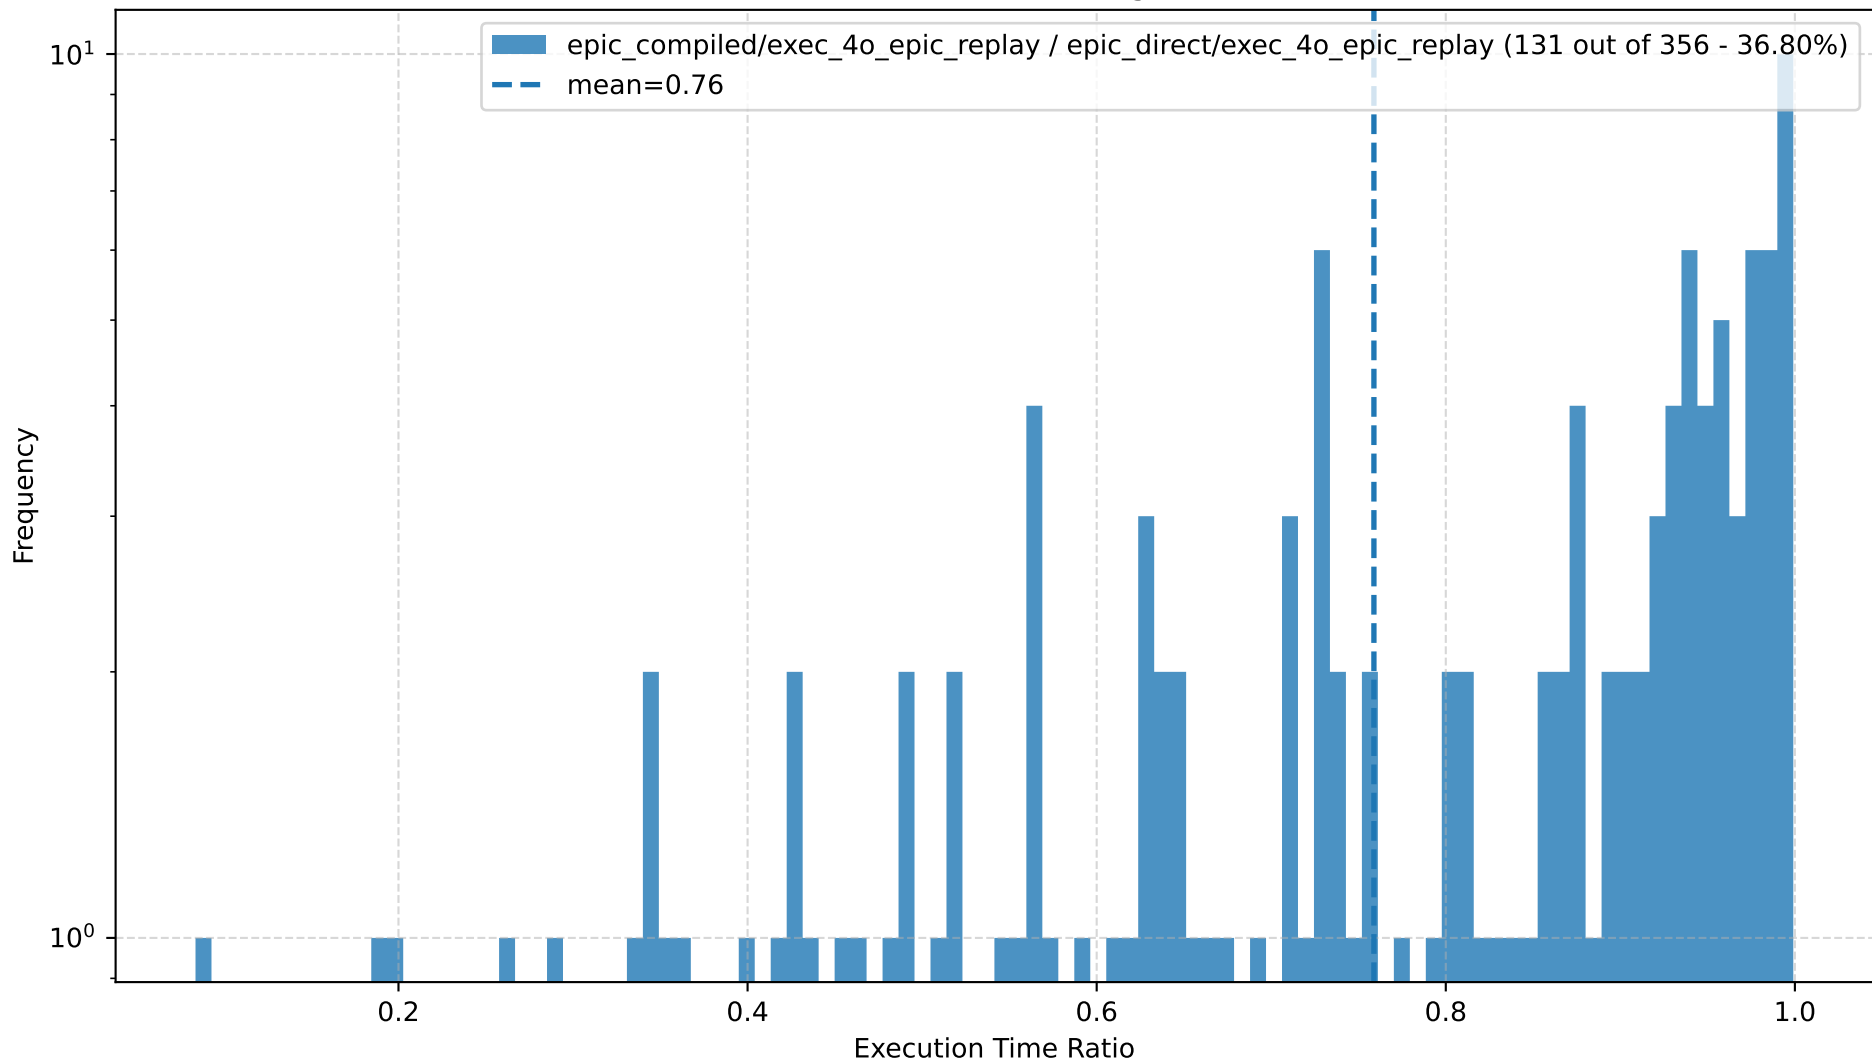

Supplement: supplementary_material [file ratio_histogram_log.pdf › quasar/datasets/gqa/plots/runtime/exec_4o_epic_replay/baseline_epic_direct_exec_4o_epic_replay/ratio_histogram_log.pdf]

Execution Time Comparison (Box Plot)



Supplement: supplementary_material [file runtime_boxplot.pdf › quasar/datasets/gqa/plots/runtime/exec_4o_epic_replay/baseline_epic_direct_exec_4o_epic_replay/runtime_boxplot.pdf]

Execution Time Comparison (Density Plot)

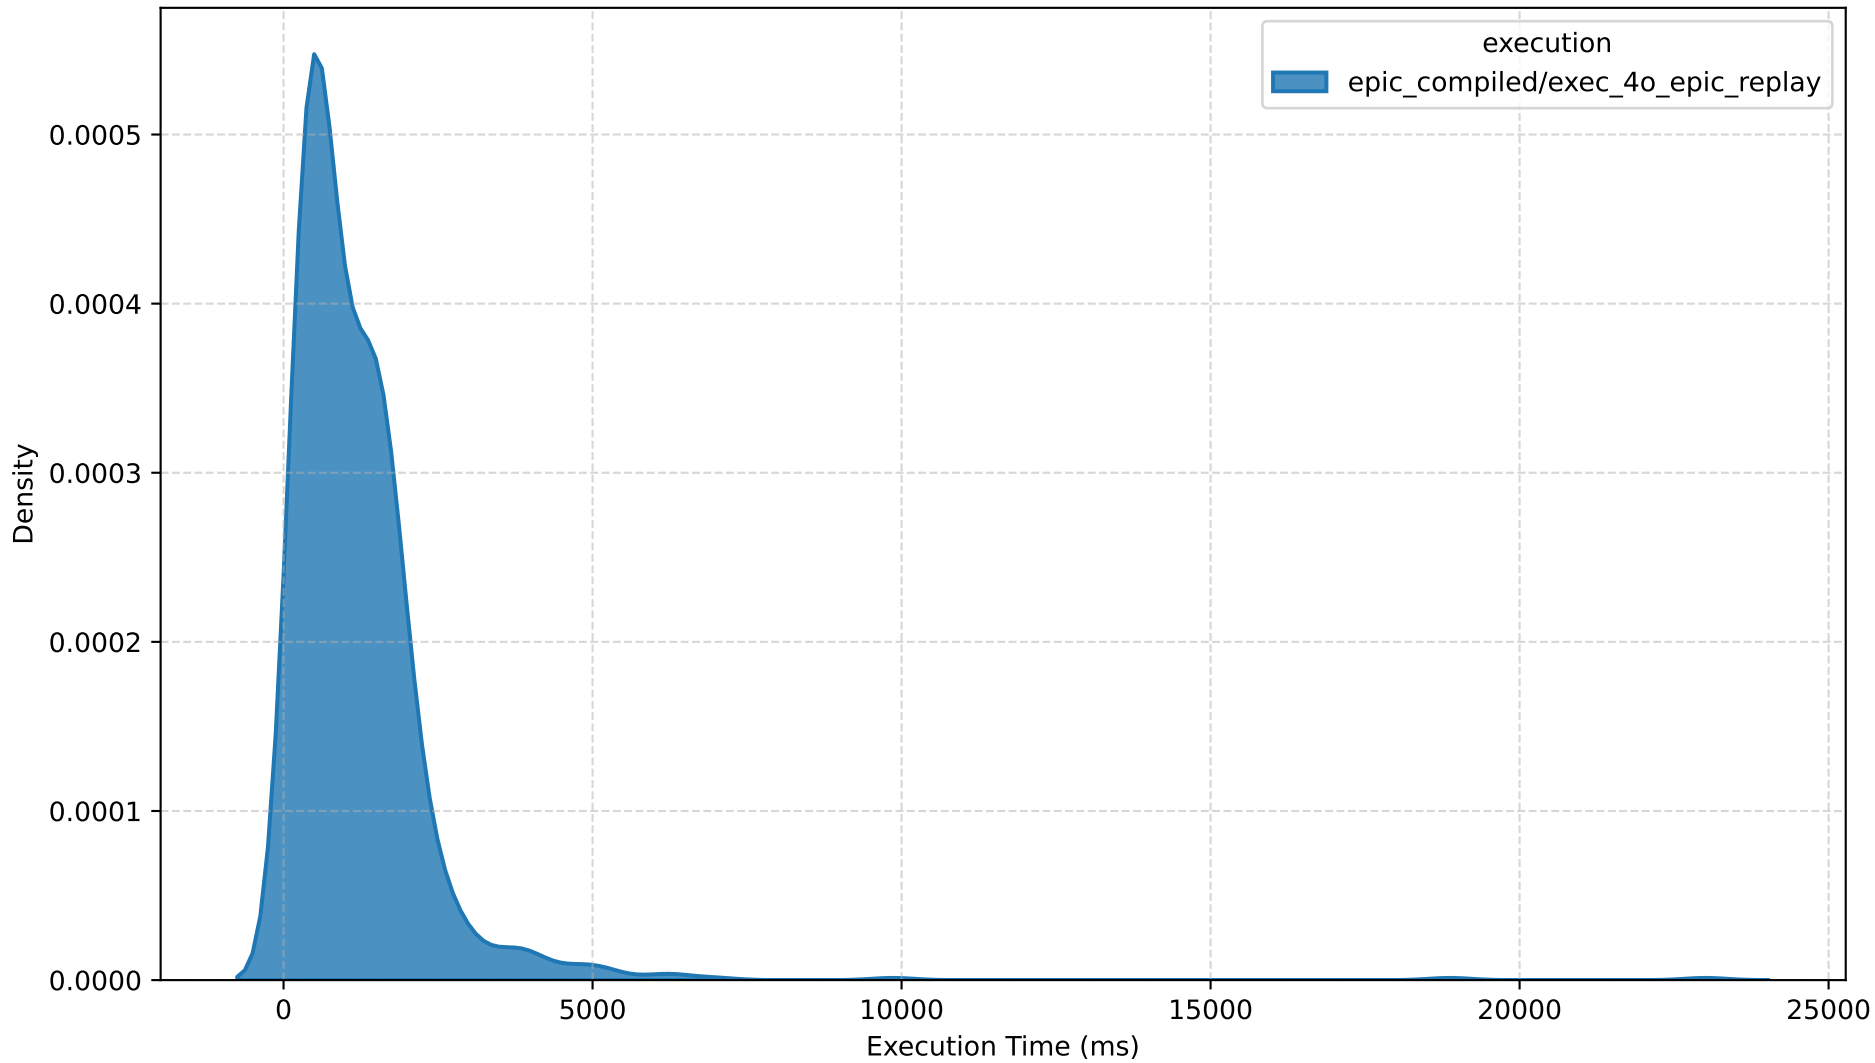

Supplement: supplementary_material [file runtime_density.pdf › quasar/datasets/gqa/plots/runtime/exec_4o_epic_replay/baseline_epic_direct_exec_4o_epic_replay/runtime_density.pdf]

Execution Time Comparison (Histogram)

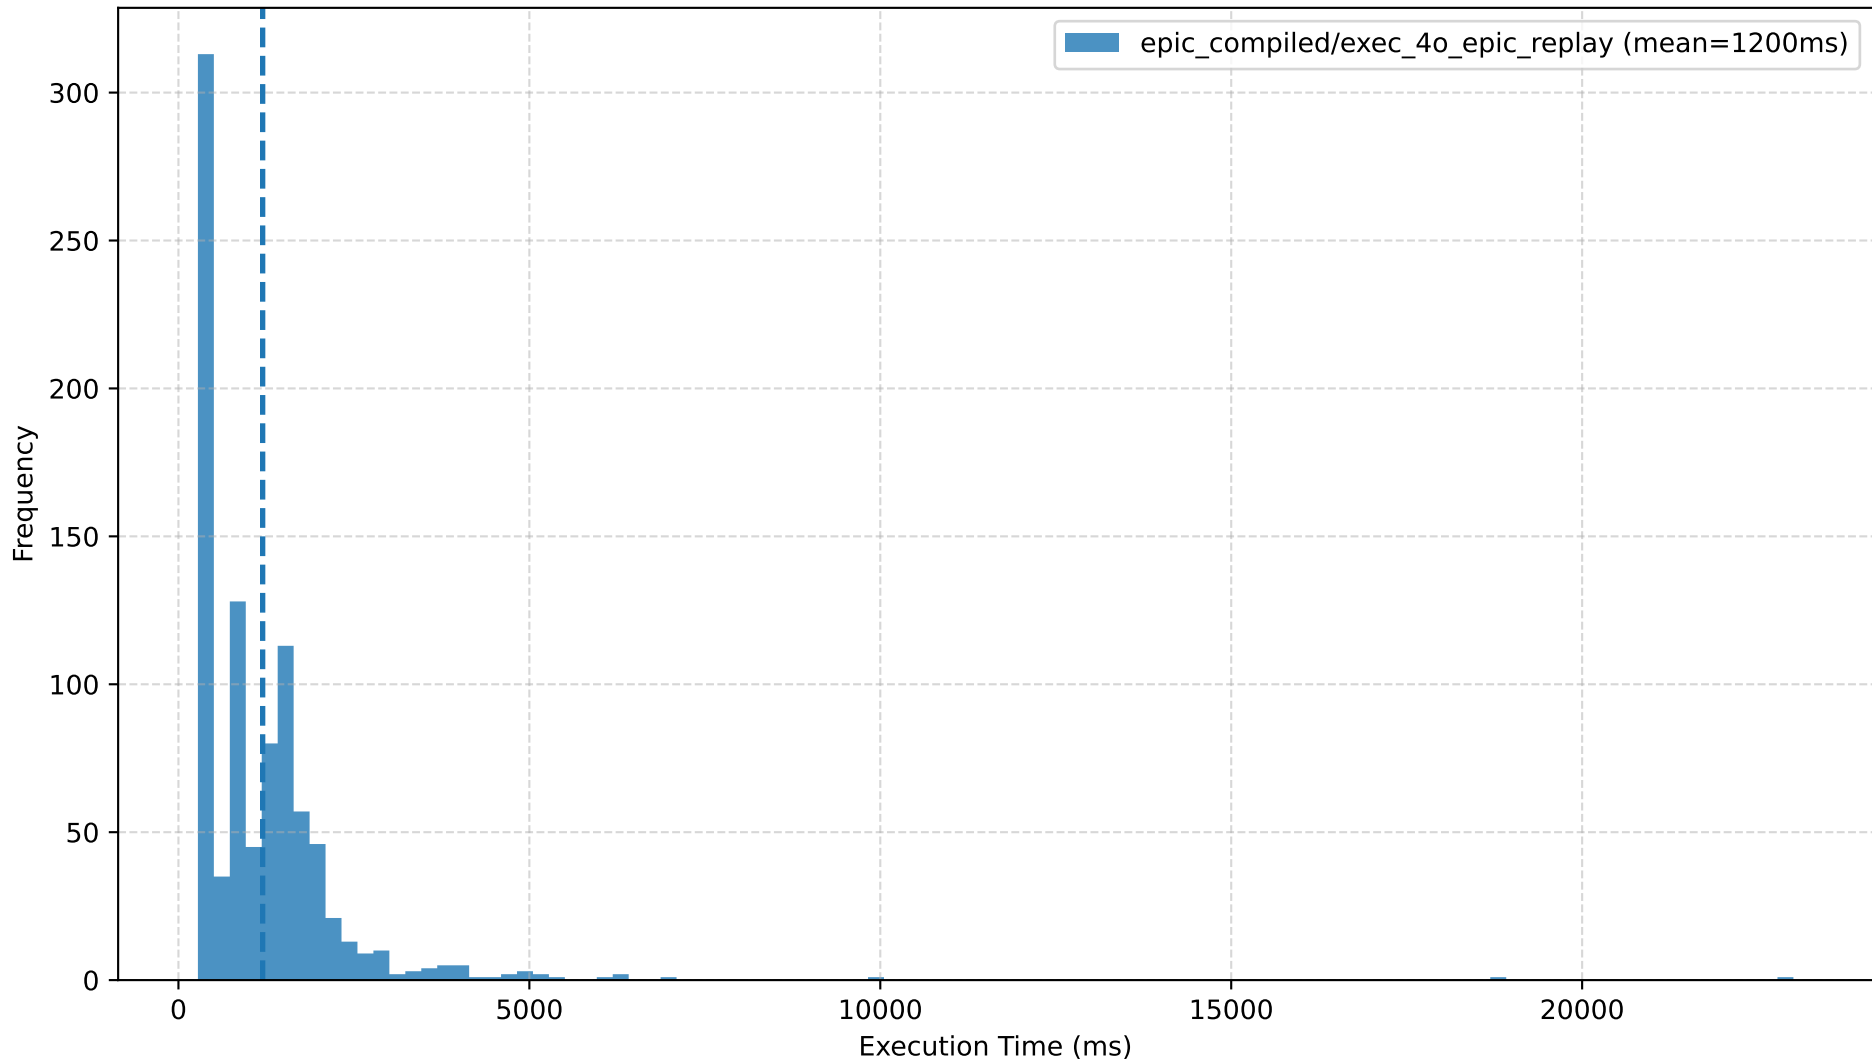

Supplement: supplementary_material [file runtime_histogram.pdf › quasar/datasets/gqa/plots/runtime/exec_4o_epic_replay/baseline_epic_direct_exec_4o_epic_replay/runtime_histogram.pdf]

Execution Time Ratio

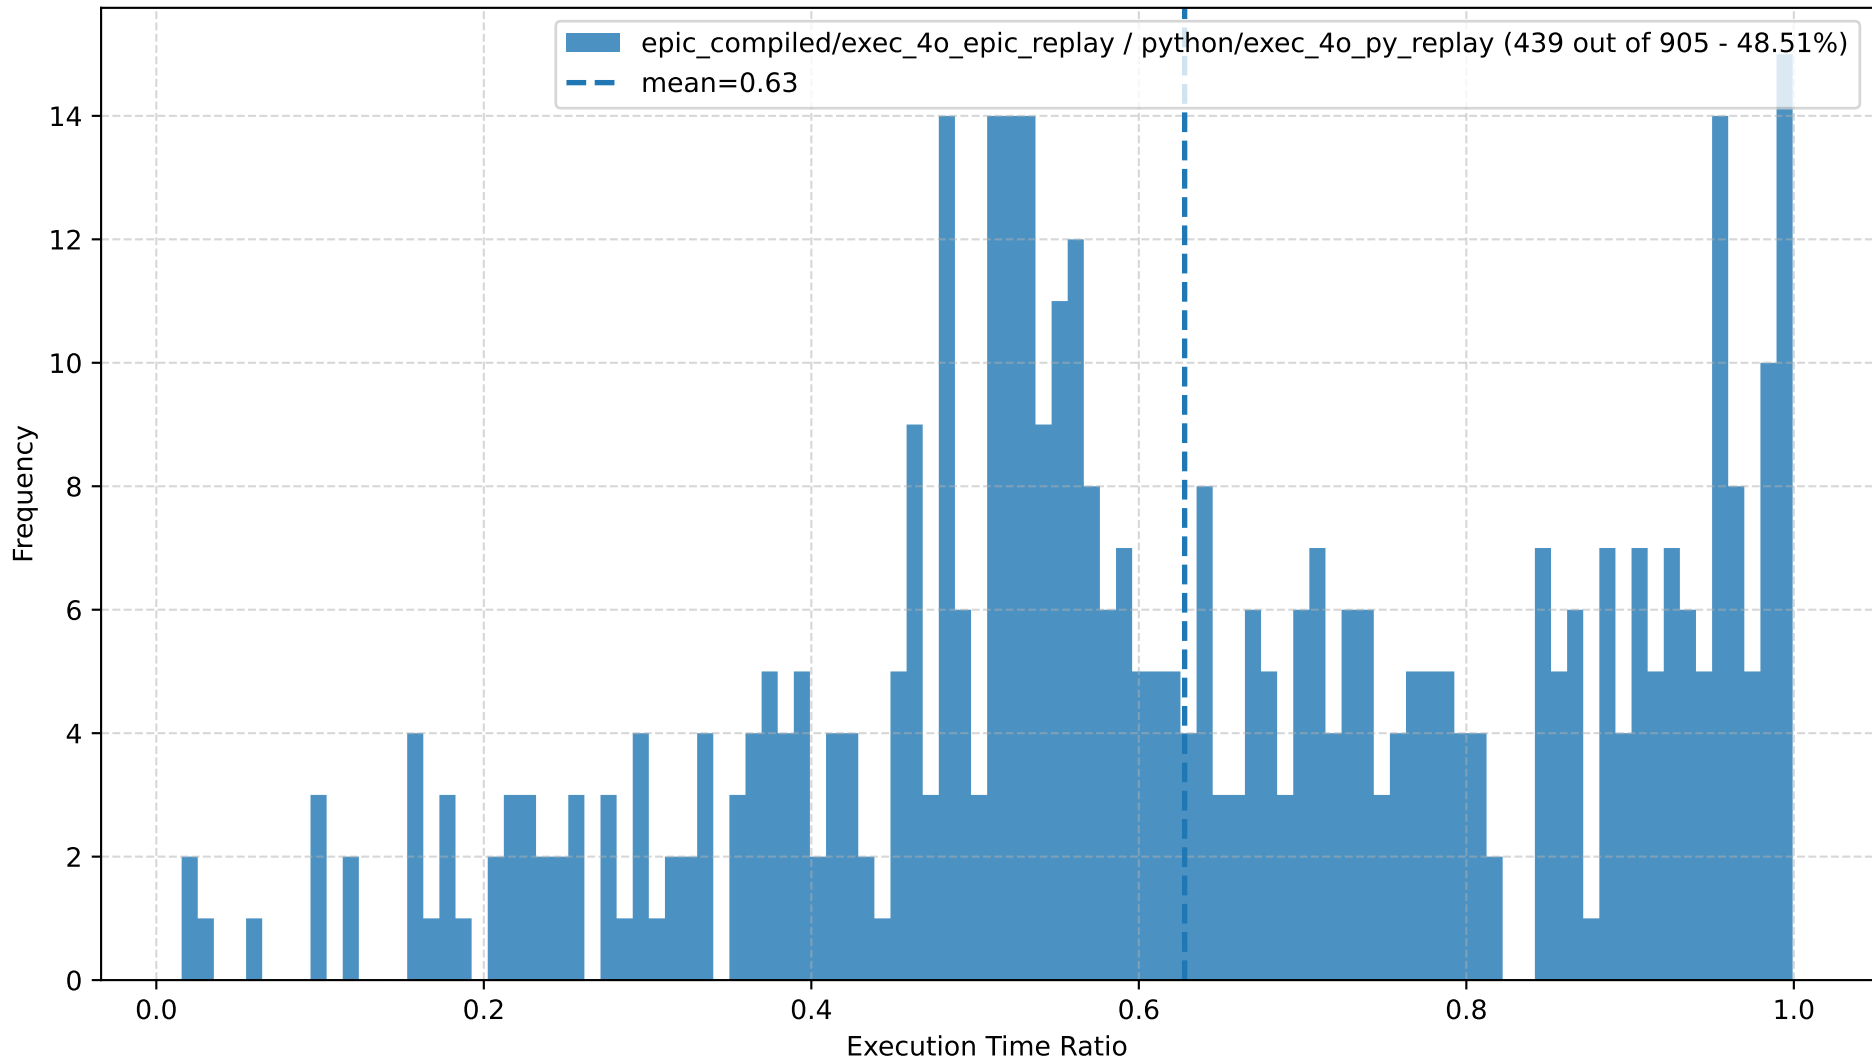

Supplement: supplementary_material [file ratio_histogram.pdf › quasar/datasets/gqa/plots/runtime/exec_4o_epic_replay/baseline_python_exec_4o_py_replay/ratio_histogram.pdf]

Execution Time Ratio (Log Scale)

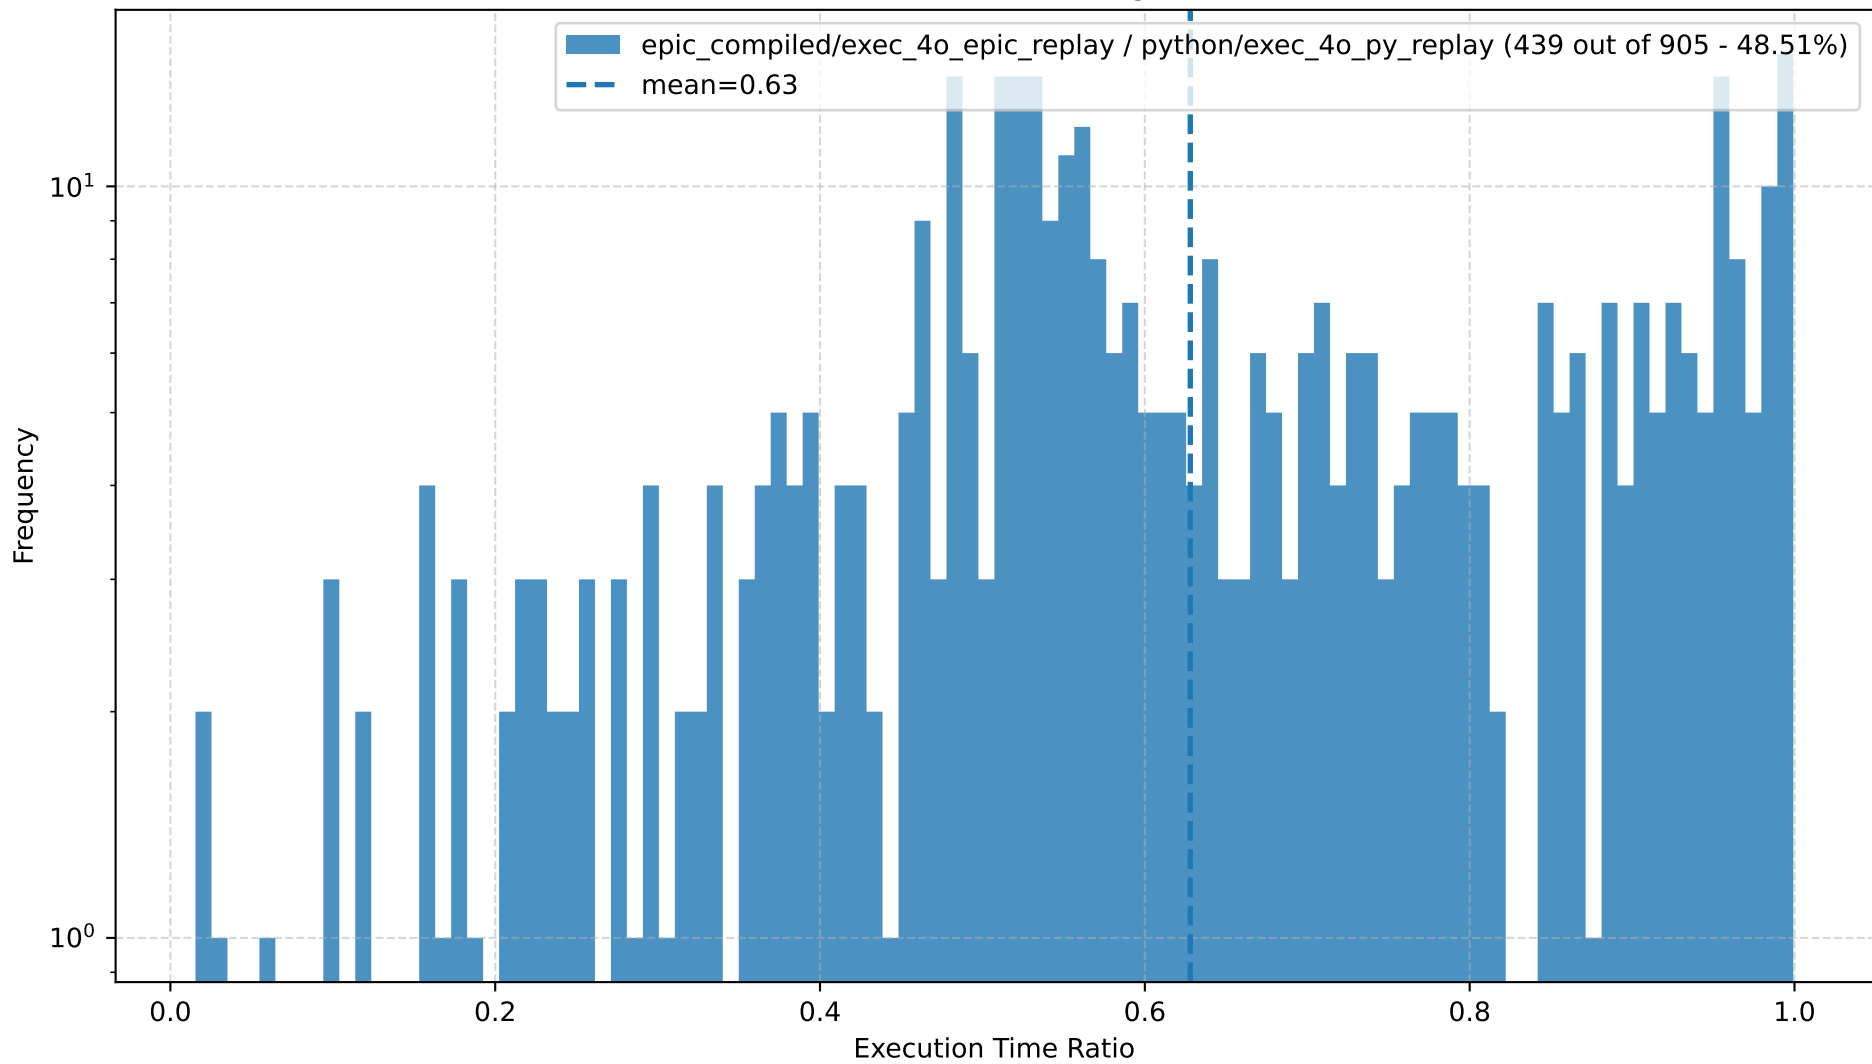

Supplement: supplementary_material [file ratio_histogram_log.pdf › quasar/datasets/gqa/plots/runtime/exec_4o_epic_replay/baseline_python_exec_4o_py_replay/ratio_histogram_log.pdf]

Execution Time Comparison (Box Plot)



Supplement: supplementary_material [file runtime_boxplot.pdf › quasar/datasets/gqa/plots/runtime/exec_4o_epic_replay/baseline_python_exec_4o_py_replay/runtime_boxplot.pdf]

Execution Time Comparison (Density Plot)

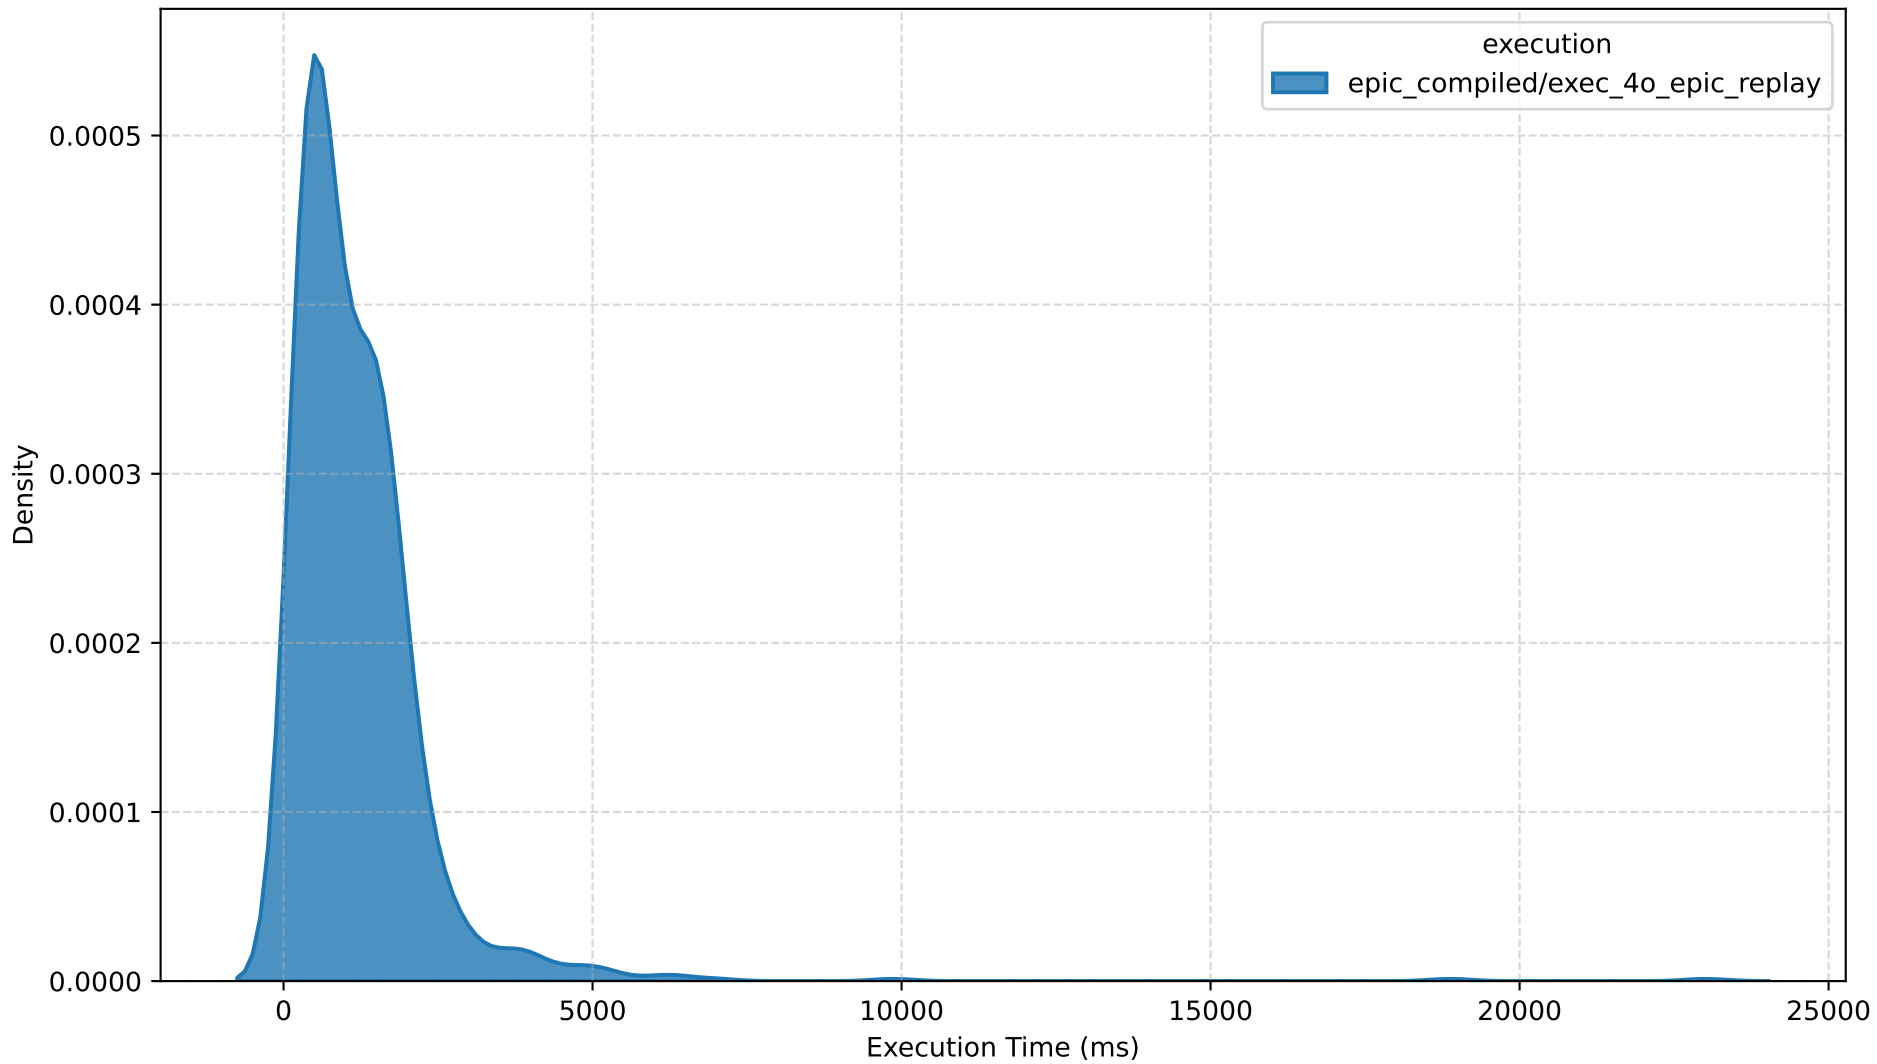

Supplement: supplementary_material [file runtime_density.pdf › quasar/datasets/gqa/plots/runtime/exec_4o_epic_replay/baseline_python_exec_4o_py_replay/runtime_density.pdf]

Execution Time Comparison (Histogram)



Supplement: supplementary_material [file runtime_histogram.pdf › quasar/datasets/gqa/plots/runtime/exec_4o_epic_replay/baseline_python_exec_4o_py_replay/runtime_histogram.pdf]
